# Supplementary material for: Live-cell imaging of multiple endogenous mRNAs permits the direct observation of RNA granule dynamics
Source: Royal Society of Chemistry journal article supplement (doi:10.1039/c8cc03805h), 2018-01-01

## Electronic Supplementary Information

### Live-Cell Imaging of Multiple Endogenous mRNAs Permits Direct Observation of RNA Granule Dynamics

Kenji Yatsuzuka,<sup>a</sup> Shin-ichi Sato,<sup>\*a</sup> Kathleen Beverly Pe,<sup>a</sup> Yousuke Katsuda,<sup>‡a</sup>

Ippei Takashima,<sup>a</sup> Mizuki Watanabe <sup>§a</sup> and Motonari Uesugi <sup>\*ab</sup>

<sup>a</sup>*Institute for Chemical Research and <sup>b</sup>Institute for Integrated Cell-Material Sciences  
(WPI-iCeMS), Kyoto University, Uji, Kyoto 611-0011, Japan*

#### *Present Addresses*

<sup>‡</sup>Division of Materials Science, Faculty of Advanced Science and Technology,  
Kumamoto University, Kumamoto 860-8555, Japan

<sup>§</sup>Faculty of Pharmaceutical Sciences, Hokkaido University, Kita-12, Nishi-6, Kita-ku,  
Sapporo 060-0812, Japan

\*Correspondence should be addressed to M.U. (uesugi@scl.kyoto-u.ac.jp), and S.S.  
(ssato@scl.kyoto-u.ac.jp).

## Supplementary Contents

### Supplementary Figures

|            |      |
|------------|------|
| Figure S1  | S-3  |
| Figure S2  | S-4  |
| Figure S3  | S-5  |
| Figure S4  | S-6  |
| Figure S5  | S-7  |
| Figure S6  | S-8  |
| Figure S7  | S-9  |
| Figure S8  | S-10 |
| Figure S9  | S-11 |
| Figure S10 | S-12 |
| Figure S11 | S-13 |
| Figure S12 | S-14 |
| Figure S13 | S-15 |
| Figure S14 | S-16 |

### Supplementary Tables

|          |      |
|----------|------|
| Table S1 | S-17 |
| Table S2 | S-18 |
| Table S3 | S-19 |
| Table S4 | S-20 |

### Supplementary Videos

### Supplementary Methods

|                                                       |      |
|-------------------------------------------------------|------|
| Chemical Synthesis                                    | S-24 |
| General procedures                                    | S-35 |
| Fluorescence measurement                              | S-35 |
| In vitro selection procedures for DNB binding aptamer | S-36 |
| K <sub>d</sub> determination                          | S-36 |
| Cell culture and DNA transfection                     | S-36 |
| Fixed cell imaging                                    | S-37 |
| Live-cell imaging                                     | S-37 |

### References

### NMR spectra

## Supplementary Figures

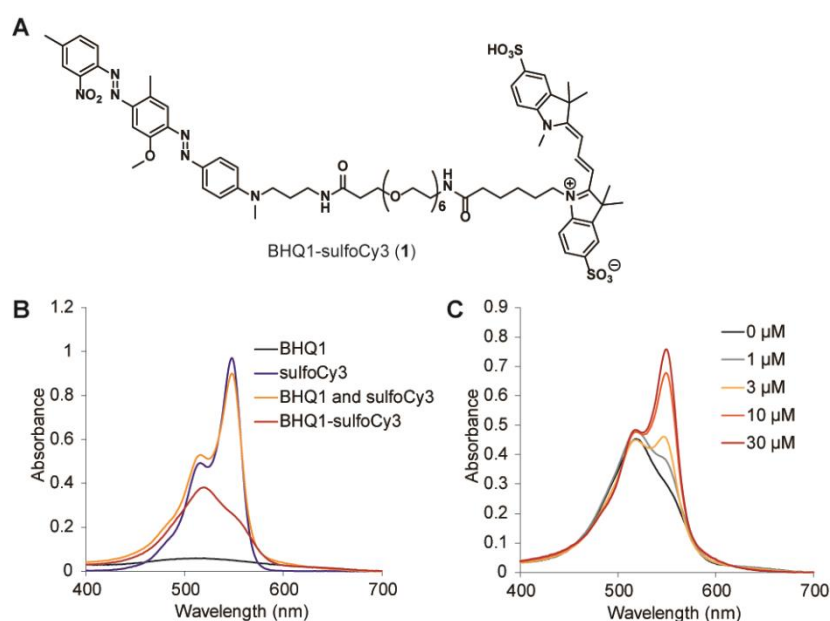

**Figure S1.** Chemical properties of probe **1**. (A) Chemical structure of probe **1**. (B) Absorption spectra of BHQ1, sulfoCy3, a 1:1 mixture of BHQ1 and sulfoCy3, and BHQ1-sulfoCy3 conjugate probe **1** [5  $\mu$ M each] in a binding buffer (10 mM Tris-HCl, 100 mM KCl, 5 mM MgCl<sub>2</sub>, pH 7.6). (C) Absorption spectra of probe **1** [5  $\mu$ M] in the presence of various concentrations of A1 aptamer.

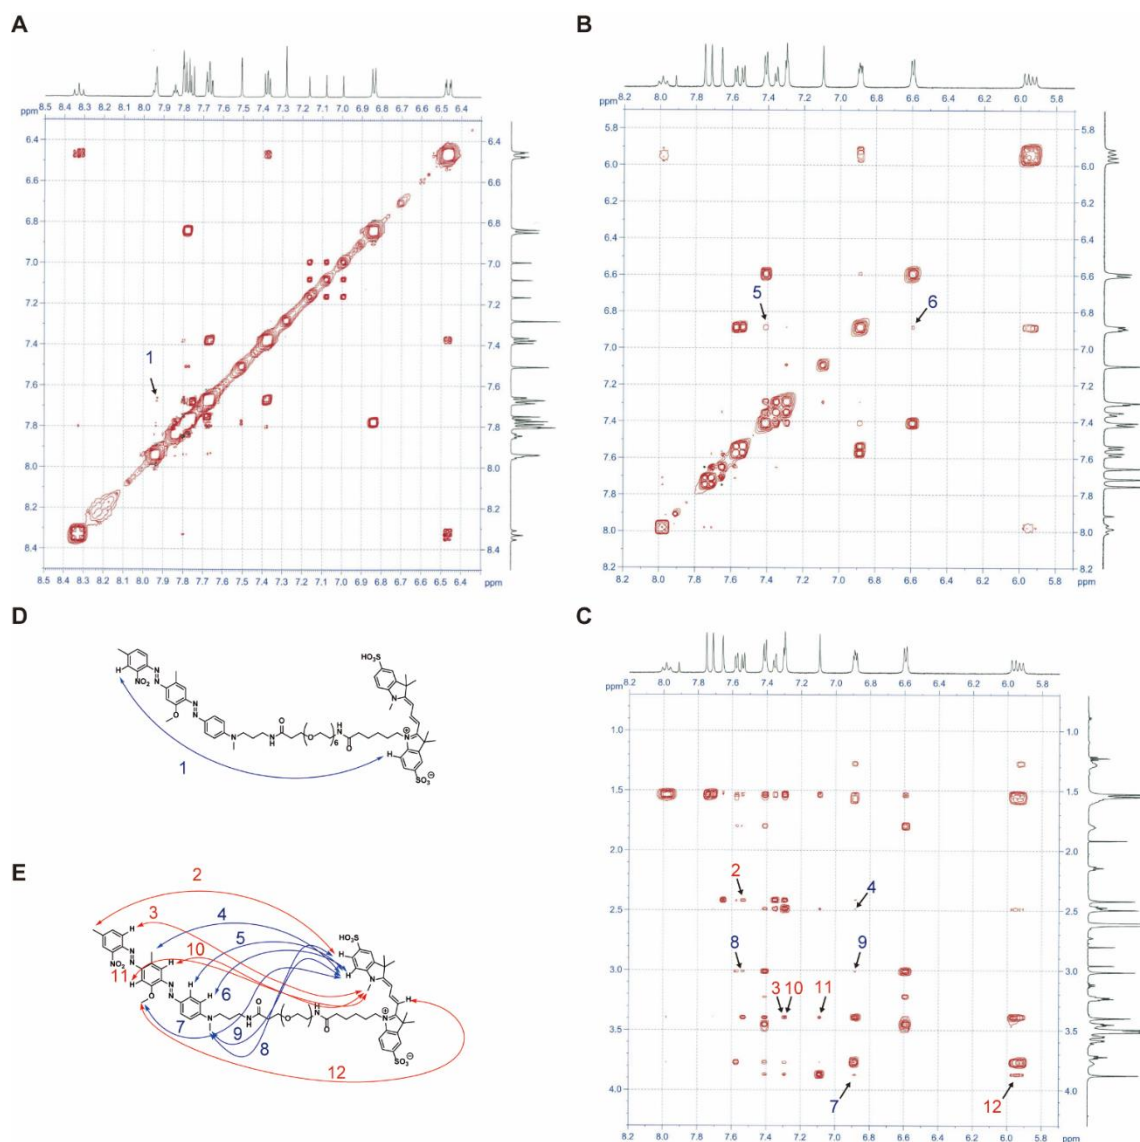

**Figure S2.** NOESY analysis of probe **1**. (A,B) Expanded aromatic regions of NOESY spectra of probe **1** in DMSO- $d_6$  (A) and in 50% (v/v) D<sub>2</sub>O/DMSO- $d_6$  (B); (C) Expanded aromatic to aliphatic regions of NOESY spectra of probe **1** in 50% (v/v) D<sub>2</sub>O/DMSO- $d_6$ ; (D,E) Observed NOE interactions between BHQ1 and sulfoCy3 in DMSO- $d_6$  (D) and in 50% (v/v) D<sub>2</sub>O/DMSO- $d_6$  (E). Blue arrows and red arrows indicate locations of weak and strong NOEs, respectively.



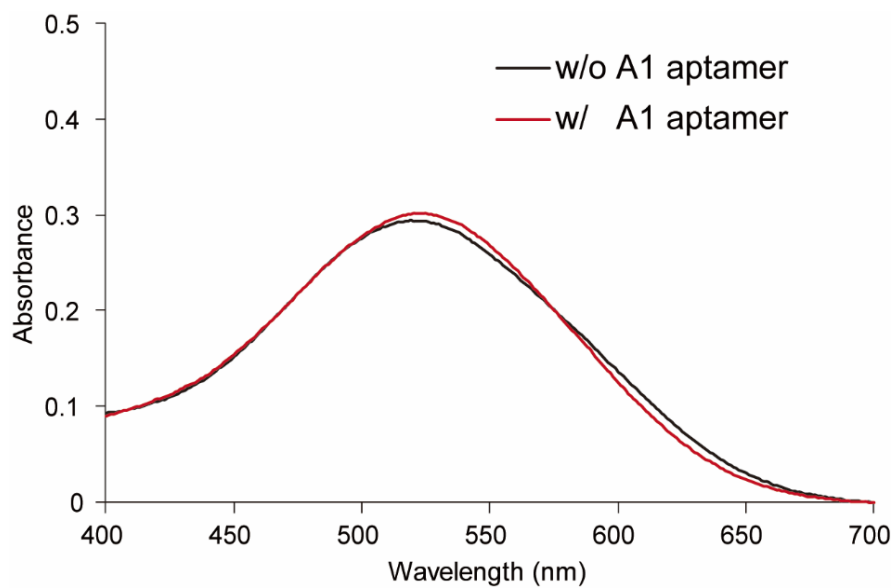

**Figure S3.** Absorption spectrum of BHQ1. Absorption spectra of BHQ1 [10  $\mu$ M] in the absence (black) and presence (red) of A1 aptamer [30  $\mu$ M] in binding buffer (10 mM Tris-HCl, 100 mM KCl, 5 mM MgCl<sub>2</sub>, pH 7.6).

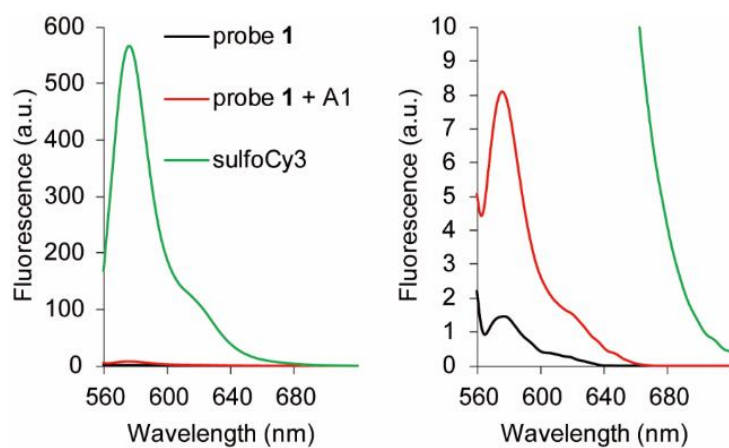

**Figure S4.** Full size (left) and enlargement (right) of fluorescence emission spectra of the probe **1** with (red) and without (black) the A1 aptamer, and sulfoCy3 (green) in binding buffer (10 mM Tris-HCl, 100 mM KCl, 5 mM MgCl<sub>2</sub>, pH 7.6).

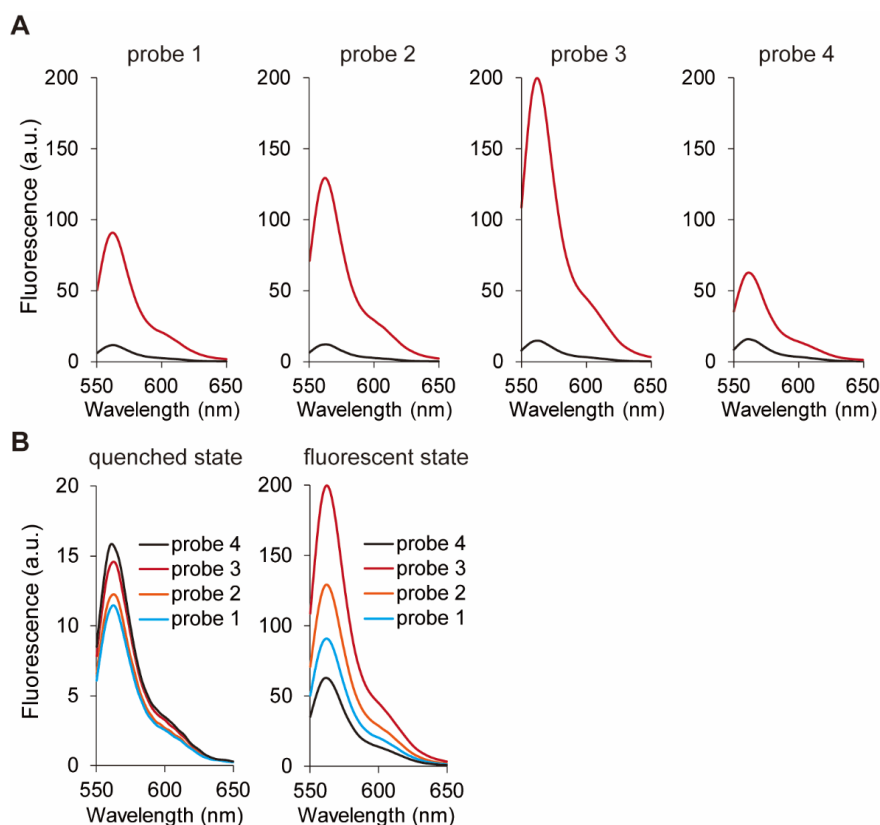

**Figure S5.** Fluorescence emission spectra of BHQ1-sulfoCy3 conjugate probes. (A) Fluorescence intensity of the probes [ $2\ \mu\text{M}$ ] with different linker lengths, in the absence (black) and presence (red) of an A1 aptamer [ $30\ \mu\text{M}$ ] in binding buffer (10 mM Tris-HCl, 100 mM KCl, 5 mM  $\text{MgCl}_2$ , pH 7.6). (B) Fluorescence intensity of each probe in quenched and fluorescent states.

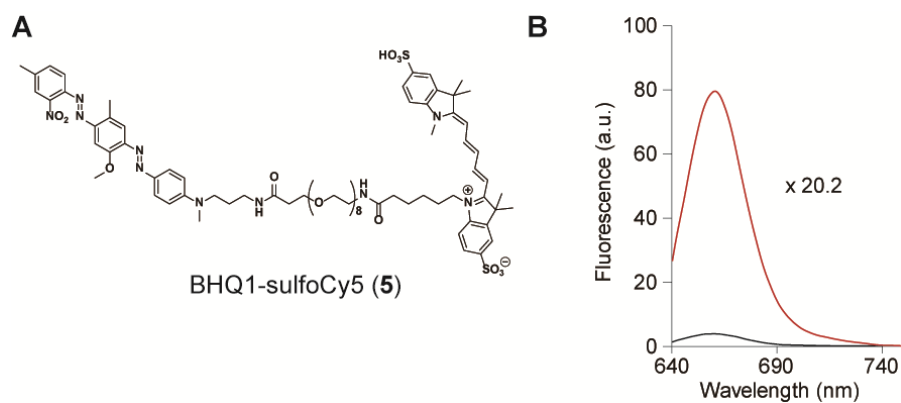

**Figure S6.** Probe **5**. (A) Chemical structure of BHQ1-sulfoCy5 conjugate probe **5**. (B) Fluorescence emission spectra of the probe in the absence (black) and presence (red) of A1 aptamer.

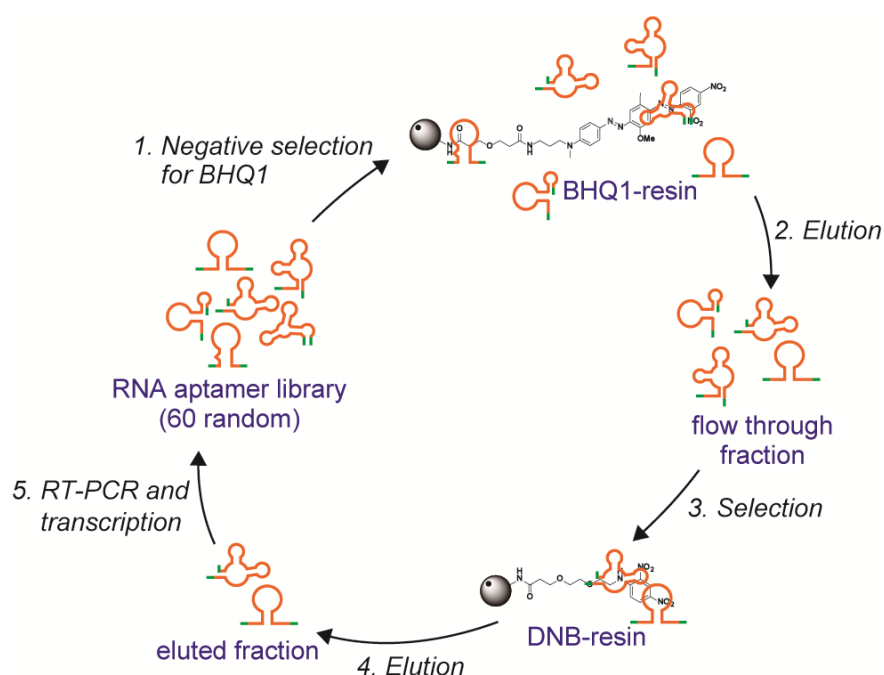

**Figure S7.** *In vitro* selection of DNB aptamer. To obtain an RNA aptamer for DNB, we carried out in vitro selection of an RNA library comprising 60-base random sequences. The sequences that potentially exhibit cross-responses to BHQ1 were removed from the library using BHQ1-immobilized resins (steps 1 and 2). The unbound RNAs were further treated with DNB-immobilized resins (step 3). After extensive washing, DNB-binding sequences were eluted with free DNB (step 4). The next-generation library of the collected RNAs was regenerated by subsequent reverse transcription, polymerase chain reaction, and transcription (step 5).

**A**

| Clone | Sequence                                                                                            |
|-------|-----------------------------------------------------------------------------------------------------|
| DNB1  | CGCGUGUGCACACC <b>GUCGACGUG</b> CGUGGCCUUGUGACGGGCACUUG <b>CAAUGUGGUG</b> AAGCAAGCACAUUUAAGUCCGUUC  |
| DNB2  | CGCGUGUGCACACC <b>GUGGACGUG</b> UUCGAGAUAAAGCGAC <b>CAAUGUGGUG</b> CGCCACUACGUGUAAGUACCAAGCUGGUCGUC |
| DNB3  | CGCGUGUGCACACC <b>GUCGACGUG</b> UUCGAGAUAAAGCGAA <b>CAAUGUGGUG</b> CGGCACUACGUGUAAGUACCAAGCUGGUCGUC |
| DNB4  | CGCGUGUGCACACC AUGUGUAAA AUUUCGCGUAGGCGACAAU <b>AAUGUGGUG</b> UAUCGAUAAAGCGAUGCACAUGUCCGUUC         |

**B**

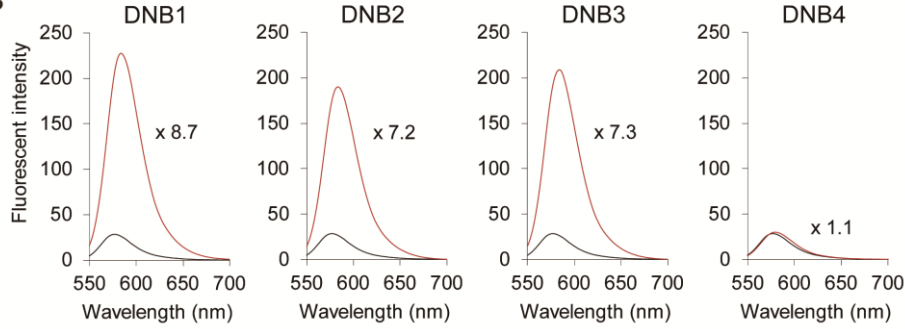

**C**

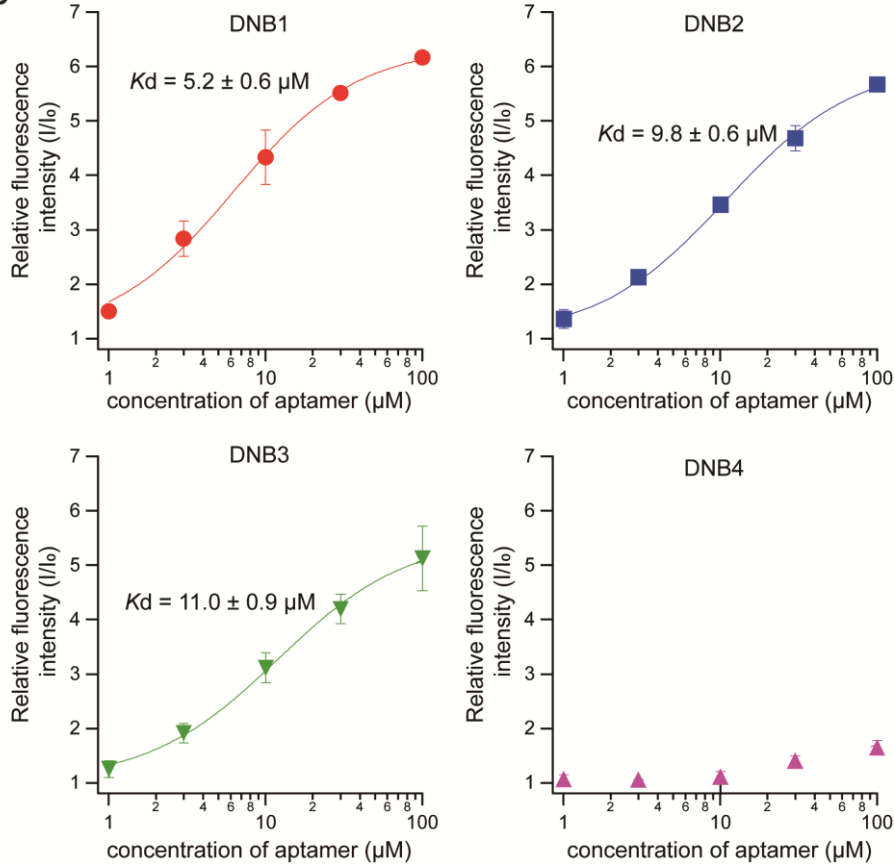

**Figure S8.** DNB aptamers. (A) Converged sequences from in vitro selection for DNB-binding aptamers (DNB1-4). (B) Fluorescence emission spectra of probe **6** in the presence of each DNB aptamer. (C) Fluorescence intensity changes following binding of clones DNB1-4 to probe **6** and  $K_d$  value of each aptamer. Relative fluorescence intensity is means  $\pm$  SD of at least three independent experiments.

| Name | Sequence                                                                 |
|------|--------------------------------------------------------------------------|
| Tg   | GGGAUUCUCGCGACAUUACAAGCUUGGAUCCC                                         |
| RT1  | GGGAUCCAAGCUUUUACCGUCGACGUGCGGCUUGUGACGGGCACUUGCAAUGUGGUGUCCGACGGAGAAUUC |
| RT2  | GGGAUCCAAGCUUUUACCGUCGACGUGCGGCUUGUGACGGGCACUUGCAAUGUGGUGUCCGACGGAGAAUUC |
| RT3  | GGGAUCCAAGCUUUUACCGUCGACGUGCGGCUUGUGACGGGCACUUGCAAUGUGGUGUCCGACGGAGAAUUC |
| RT4  | GGGAUCCAAGCUUUUACCGUCGACGUGCGGCUUGUGACGGGCACUUGCAAUGUGGUGUCCGACGGAGAAUUC |
| RT5  | GGGAUCCAAGCUUUUACCGUCGACGUGCGGCUUGUGACGGGCACUUGCAAUGUGGUGUCCGACGGAGAAUUC |
| RT6  | GGGAUCCAAGCUUUUACCGUCGACGUGCGGCUUGUGACGGGCACUUGCAAUGUGGUGUCCGACGGAGAAUUC |
| RT7  | GGGAUCCAAGCUUUUACCGUCGACGUGCGGCUUGUGACGGGCACUUGCAAUGUGGUGUCCGACGGAGAAUUC |

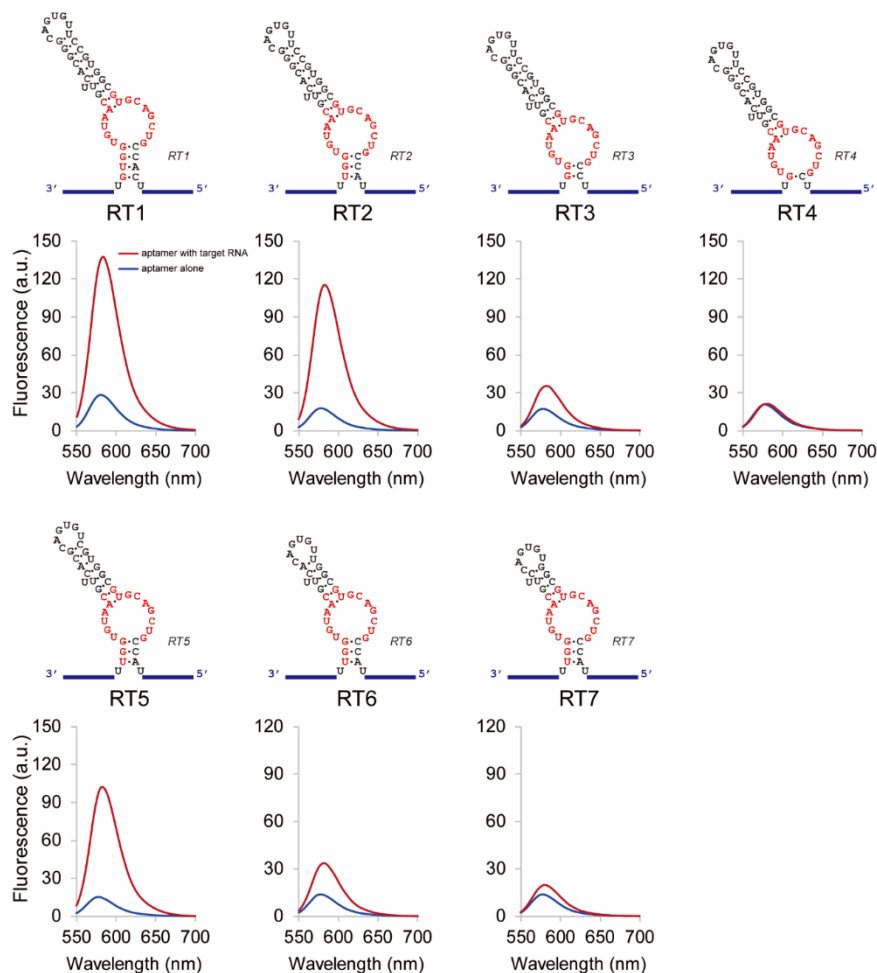

**Figure S9.** Restoration of the fluorescence ability of DNB-RT aptamers. Fluorescence intensity of probe **6** with each aptamer in the absence and presence of the target RNA.

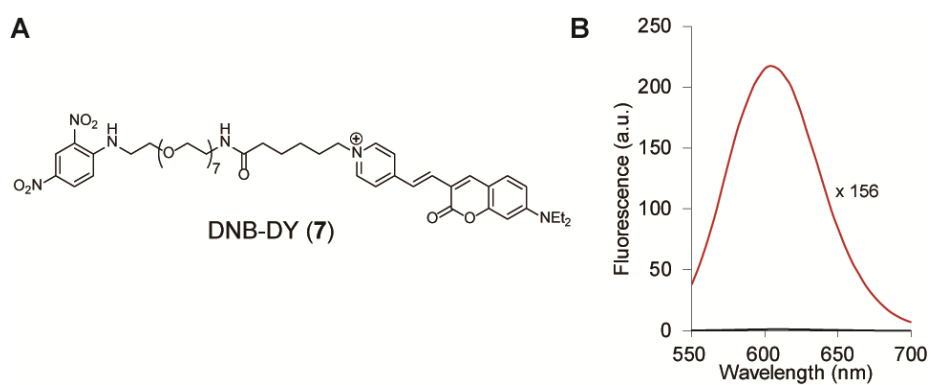

**Figure S10.** Probe **7**. (A) Chemical structure of DNB-DY conjugate probe **7**. (B) Fluorescence emission spectra of probe **7** in the absence (black) and presence (red) of the DNB1 aptamer.



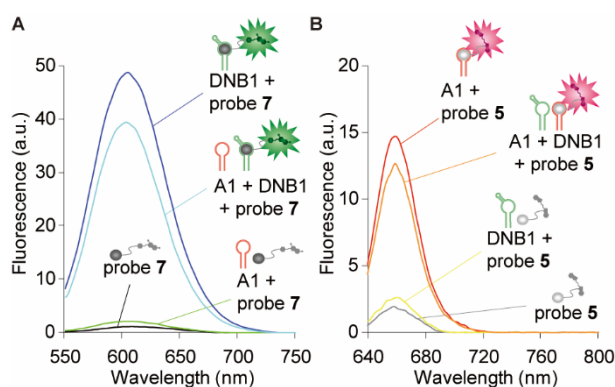

**Figure S11.** Estimation of the cross response of aptamers to fluorescent probes. (A) Cross response of probe **7** to each aptamer. (B) Cross response of probe **5** to each aptamer. A1 aptamer and DNB1 aptamer have no cross response to the BHQ1-conjugated probe (**5**) and the DNB-conjugated probe (**7**), respectively.

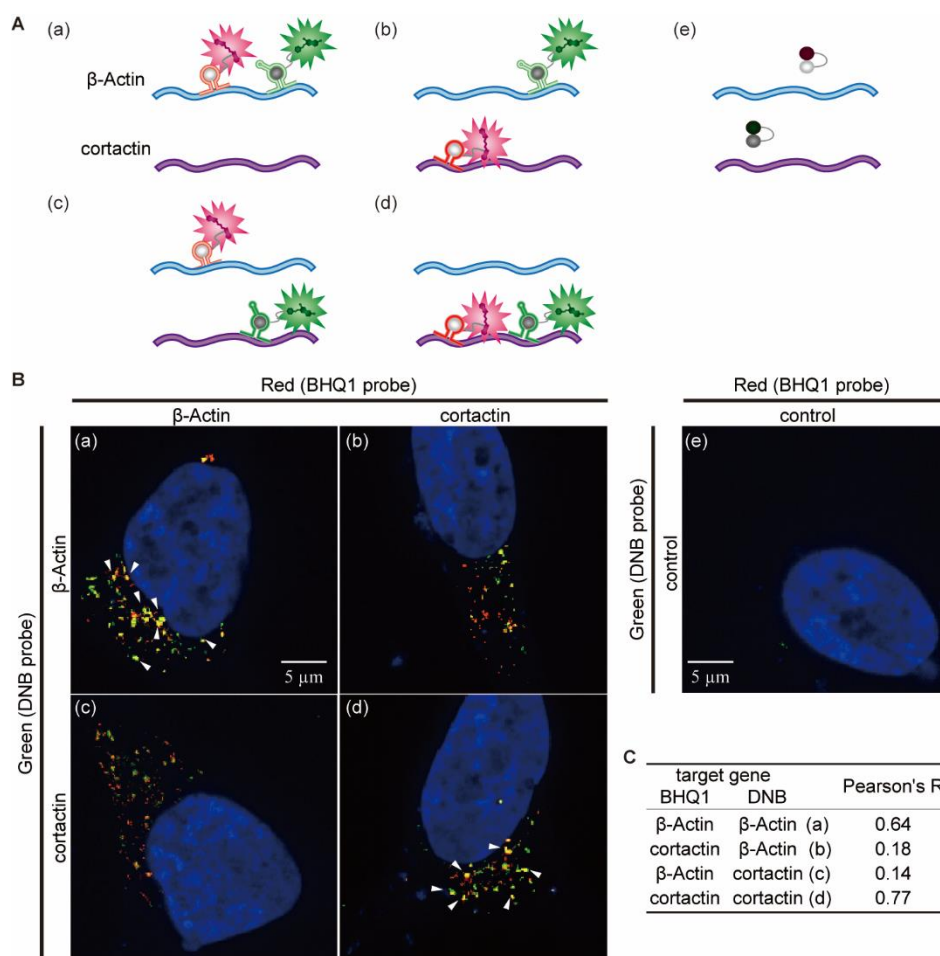

**Figure S12.** Multicolor imaging of endogenous  $\beta$ -actin mRNA and cortactin mRNA in fixed HeLa cells. (A) Schematic illustration of the experiments. (B) Real experimental images. (a) Both probe **5** (red dots) and probe **7** (green dots) were targeted to  $\beta$ -actin mRNA by their corresponding aptamers; (b, c) probe **5** (red dots) and probe **7** (green dots) were targeted to different mRNAs; (d) both probe **5** (red dots) and probe **7** (green dots) were targeted to cortactin mRNA. (e) A control experimental image. Cells were treated with probe **5** and probe **7** and without aptamers. Staining of the nuclei with DAPI is shown in blue. (C) Assessment of colocalization between green and red fluorescent dots. Pearson's correlation coefficient values (Pearson's R) were quantified by ImageJ.

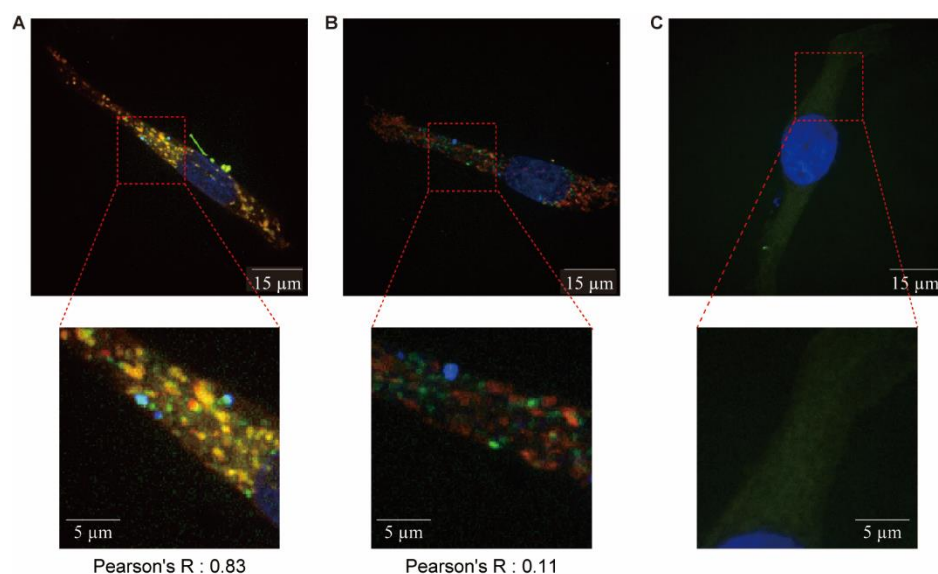

**Figure S13.** Multicolor imaging of endogenous mRNAs in living HeLa cells. (A)  $\beta$ -actin mRNA with BHQ1 aptamer paired with BHQ1-Cy5 probe **8** (red dots), and DNB aptamer paired with DNB-DY probe **7** (green dots). (B)  $\beta$ -actin mRNA with BHQ1 aptamer paired with BHQ1-Cy5 probe **8** (red dots); cortactin mRNA with DNB aptamer paired with DNB-DY probe **7** (green dots). (C) Background fluorescence of BHQ1-Cy5 probe **8** (red dots) and DNB-DY probe **7** (green dots) without aptamer expression. Staining of the nuclei with Hoechst 33342 is shown in blue. Co-localisation between BHQ1-Cy5 probe **8** (red dots) and DNB-DY probe **7** was quantified by ImageJ. Pearson's correlation coefficient values (Pearson's R) are shown at the bottom.



## Supplementary Tables

**Table 1. Signal-to-background ratios of BHQ1-sulfoCy3 conjugate probes with different linker lengths.** Probes [2  $\mu$ M] and A1 aptamer [30  $\mu$ M] in binding buffer (10 mM Tris-HCl, 100 mM KCl, 5 mM MgCl<sub>2</sub>, pH 7.6).

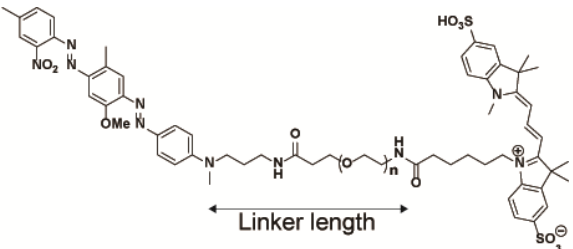

| probe    | n = | Length (Å) | signal-to-background ratio |
|----------|-----|------------|----------------------------|
| <b>1</b> | 6   | 38         | 7.9                        |
| <b>2</b> | 8   | 45         | 10.5                       |
| <b>3</b> | 12  | 59         | 13.7                       |
| <b>4</b> | 4   | 30         | 4.0                        |

**Table S2. Signal-to-background ratio of BHQ1-conjugated probes with different fluorophores.**

Probes [2  $\mu$ M] and A1 aptamer [30  $\mu$ M] in binding buffer (10 mM Tris-HCl, 100 mM KCl, 5 mM MgCl<sub>2</sub>, pH 7.6).

| 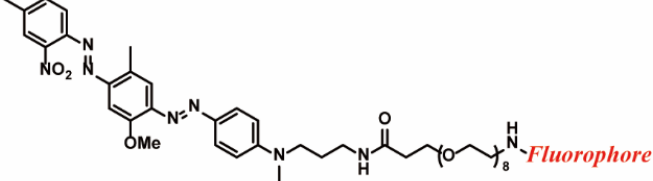 |                                                                                     |                            |
|------------------------------------------------------------------------------------|-------------------------------------------------------------------------------------|----------------------------|
| Fluorophore                                                                        |                                                                                     | signal-to-background ratio |
| sulfoCy3<br>(3)                                                                    |    | 10.5                       |
| sulfoCy5<br>(5)                                                                    |    | 20.2                       |
| ATTO465<br>(S4)                                                                    |   | 2.4                        |
| BODIPY 558/568<br>(S5)                                                             |  | 1                          |
| TAMRA<br>(S6)                                                                      |  | 2.2                        |
| NBD-X<br>(S7)                                                                      |  | 3.6                        |
| DEAC<br>(S8)                                                                       |  | 4.4                        |

**Table S3. Signal-to-background ratio of DNB-conjugated probes with different fluorophores.**

Probes [2  $\mu$ M] and DNB1 aptamer [30  $\mu$ M] in binding buffer (10 mM Tris-HCl, 100 mM KCl, 5 mM MgCl<sub>2</sub>, pH 7.6).

| Fluorophore               |  | n | signal-to-background ratio |
|---------------------------|--|---|----------------------------|
| TAMRA<br>(6)              |  | 2 | 11.0                       |
| DEAC<br>(S9)              |  | 2 | 2.4                        |
| Marina Blue<br>(S10)      |  | 2 | 3                          |
| fluorescein<br>(S11)      |  | 2 | 1.5                        |
| Oregon Green 488<br>(S12) |  | 2 | 1.5                        |
| Rhodamine Green<br>(S13)  |  | 2 | 5.7                        |
| (S14)                     |  | 2 | 52.4                       |
| DY<br>(7)                 |  | 7 | 85.5                       |

**Table S4. DNA oligonucleotides.**

| For in vitro selection of DNB aptamer                                      |                                                                               |
|----------------------------------------------------------------------------|-------------------------------------------------------------------------------|
| template                                                                   | GCTAATACGACTCACTATAGGGAATTCCGCGTGTGCACACC-N60-GTCCGTTGGGATCCTCATGG            |
| forward primer for selection                                               | GCTAATACGACTCACTATAGGGAATTCCGCGTGTGCACACC                                     |
| reverse primer for selection                                               | CCATGAGGATCCGAACGGAC                                                          |
| For evaluation of probe-binding activity for short versions of DNB aptamer |                                                                               |
| forward primer for DNB short                                               | GCTAATACGACTCACTATAGTGTGCACACCGTCGACGTG                                       |
| reverse primer for DNB short                                               | ATGTGCTTGCTTCACCACAT                                                          |
| DNB short mut template1 forward                                            | GTCTCCACACCGTCGACGTGCGGTGCCTTGTGACGGGCACTTG                                   |
| DNB short mut template1 reverse                                            | CAAGTGCCCGTCACAAGGCACCGCACGTGACGGTGTGGAGAC                                    |
| DNB short mut template2 forward                                            | TGCCTTGTGACGGGCACTTGCAATGTGGTGAAGCAACCACAT                                    |
| DNB short mut template2 reverse                                            | ATGTGGTTGCTTCACCACATTGCAAGTGCCCGTCACAAGGCA                                    |
| forward primer for DNB short mut                                           | GCTAATACGACTCACTATAGGGTCTCCACACCGTCGACGTG                                     |
| reverse primer for DNB short mut                                           | ATGTGGTTGCTTCACCACAT                                                          |
| For conversion of DNB binding aptamer to RNA-responsive form               |                                                                               |
| RNA target forward                                                         | GCTAATACGACTCACTATAGGGAATTCTCCGTCGACATTAACAAGCTTGGATCCC                       |
| RNA target reverse                                                         | GGGATCCAAGCTTGTTAATGTCGACGGAGAATTCCTATAGTGAGTCGTATTAGC                        |
| RT1 template forward                                                       | GGGATCCAAGCTTGTTTACCGTCGACGTGCGGTGCCTTGTGACGGGCACTTGCAATGTGGTGTTCGACGGAGAATTC |
| RT1 template reverse                                                       | GAATTCTCCGTCGAACACCACATTGCAAGTGCCCGTCACAAGGCACCGCACGTGACGGTGAAACAAGCTTGGATCCC |
| RT2 template forward                                                       | GGGATCCAAGCTTGTTTACCGTCGACGTGCGGTGCCTTGTGACGGGCACTTGCAATGTGGTTTCGACGGAGAATTC  |
| RT2 template reverse                                                       | GAATTCTCCGTCGAAACCACATTGCAAGTGCCCGTCACAAGGCACCGCACGTGACGGTAAACAAGCTTGGATCCC   |
| RT3 template forward                                                       | GGGATCCAAGCTTGTTTCCGTCGACGTGCGGTGCCTTGTGACGGGCACTTGCAATGTGGTTCGACGGAGAATTC    |
| RT3 template reverse                                                       | GAATTCTCCGTCGAACCACATTGCAAGTGCCCGTCACAAGGCACCGCACGTGACGGAAACAAGCTTGGATCCC     |
| RT4 template forward                                                       | GGGATCCAAGCTTGTTTCGTCGACGTGCGGTGCCTTGTGACGGGCACTTGCAATGTGTTCGACGGAGAATTC      |
| RT4 template reverse                                                       | GAATTCTCCGTCGAACACATTGCAAGTGCCCGTCACAAGGCACCGCACGTGACGAAACAAGCTTGGATCCC       |
| RT5 template forward                                                       | GGGATCCAAGCTTGTTTACCGTCGACGTGCGGTGCTGTGACGCACTTGCAATGTGGTTTCGACGGAGAATTC      |
| RT5 template reverse                                                       | GAATTCTCCGTCGAAACCACATTGCAAGTGCGTCACAGCACCGCACGTGACGGTAAACAAGCTTGGATCCC       |
| RT6 template forward                                                       | GGGATCCAAGCTTGTTTACCGTCGACGTGCGGTGTGACACTTGCAATGTGGTTTCGACGGAGAATTC           |
| RT6 template reverse                                                       | GAATTCTCCGTCGAAACCACATTGCAAGTGTACAACCGCACGTGACGGTAAACAAGCTTGGATCCC            |
| RT7 template forward                                                       | GGGATCCAAGCTTGTTTACCGTCGACGTGCGGTGTGACCTTGCAATGTGGTTTCGACGGAGAATTC            |
| RT7 template reverse                                                       | GAATTCTCCGTCGAAACCACATTGCAAGTGCACACCGCACGTGACGGTAAACAAGCTTGGATCCC             |
| forward primer for RT                                                      | GCTAATACGACTCACTATAGGGATCCAAGCTTGTTT                                          |
| reverse primer for RT                                                      | GGGAATTCTCCGTCGAA                                                             |



**Table S4-Continued**

---

For preparation of RNA aptamers that are responsive to RNA targets

---

|                                                             |                                                                                        |
|-------------------------------------------------------------|----------------------------------------------------------------------------------------|
| template for BHQ1 binding aptamer to $\beta$ -actin forward | TAATACGACTCACTATAGGGGAGCAATGATGGCCTAGATAAAATCGGAGCTTGATCTTCATT                         |
| template for BHQ1 binding aptamer to $\beta$ -actin reverse | AATGAAGATCAAGCTCCGAATTTATCTAGGCCATCATTGCTCCCCCTATAGTGAGTCGTATTA                        |
| template for DNB binding aptamer to $\beta$ -actin forward  | TAATACGACTCACTATAGGGATAGGAATCCTACCGTCGACGTGCGGTGCTGTGACGCACTTGCAATGTGGTTGACC<br>CATGCC |
| template for DNB binding aptamer to $\beta$ -actin reverse  | GGCATGGGTCAACCACATTGCAAGTGCCTCACAGCACCACGTCGACGGTAGGATTCCCTATCCCTATAGTGAGTC<br>GTATTA  |
| template for BHQ1 binding aptamer to cortactin forward      | TAATACGACTCACTATAGGGTACTGTCTTCTGGCCTAGATAAAATCGGAGCTTAGGCAGAGGA                        |
| template for BHQ1 binding aptamer to cortactin reverse      | TCCTCTGCCTAAGCTCCGAATTTATCTAGGCCAGAAGACAGTACCCTATAGTGAGTCGTATTA                        |
| template for DNB binding aptamer to cortactin forward       | TAATACGACTCACTATAGGGAAGGATGATGTACCGTCGACGTGCGGTGCTGTGACGCACTTGCAATGTGGTTAATG<br>CACCTC |
| template for DNB binding aptamer to cortactin reverse       | GAGGTGCATTAACCACATTGCAAGTGCCTCACAGCACCACGTCGACGGTACATCATCCTTCCCTATAGTGAGTC<br>GTATTA   |

---

For preparation of aptamer expression plasmids

---

|                                                           |                                                                             |
|-----------------------------------------------------------|-----------------------------------------------------------------------------|
| insert for BHQ1 binding aptamer to $\beta$ -actin forward | GATCCCCGAGCAATGATGGCCTAGATAAAATCGGAGCTTGATCTTCATTTTTTTA                     |
| insert for BHQ1 binding aptamer to $\beta$ -actin reverse | AGCTTAAAAAATGAAGATCAAGCTCCGAATTTATCTAGGCCATCATTGCTCCGGG                     |
| insert for DNB binding aptamer to $\beta$ -actin forward  | CCCCGGAGCAATGATACCGTCGACGTGCGGTGCTGTGACGCACTTGCAATGTGGTTGATCTTCATTTTT       |
| insert for DNB binding aptamer to $\beta$ -actin reverse  | AAAAATGAAGATCAACCACATTGCAAGTGCCTCACAGCACCACGTCGACGGTATCATTGCTCCGGGG         |
| insert for BHQ1 binding aptamer to cortactin forward      | GATCCCCTACTGTCTTCTGGCCTAGATAAAATCGGAGCTTAGGCAGAGGATTTTTA                    |
| insert for BHQ1 binding aptamer to cortactin reverse      | AGCTTAAAAATCCTCTGCCTAAGCTCCGAATTTATCTAGGCCAGAAGACAGTAGGG                    |
| insert for DNB binding aptamer to cortactin forward       | GATCCCCAAGGATGATGTACCGTCGACGTGCGGTGCTGTGACGCACTTGCAATGTGGTTAATGCACCTCTTTTTA |
| insert for DNB binding aptamer to cortactin reverse       | AGCTTAAAAAGAGGTGCATTAACCACATTGCAAGTGCCTCACAGCACCACGTCGACGGTACATCATCCTTGGG   |

---

## Supplementary Movies

**Movie S1.** Time-lapse multicolor images of  $\beta$ -actin mRNA granules (green and red dots) in live cells. Images were captured every 1 minutes for 7 minutes; playback is at 2 frames per second. Staining of the nuclei with Hoechst 33342 is shown in blue.

**Movie S2.** Time-lapse multicolor images of  $\beta$ -actin mRNA granules (green and red dots) in live cells. Images were captured every 1 minutes for 15 minutes; playback is at 2 frames per second. Staining of the nuclei with Hoechst 33342 is shown in blue.

**Movie S3.** Time-lapse multicolor images of  $\beta$ -actin (red dots) and cortactin (green dots) mRNA granules in live cells. Images were captured every 30 seconds for 15 minutes; playback is at 2 frames per second. Staining of the nuclei with Hoechst 33342 is shown in blue.

**Movie S4.** Time-lapse multicolor images of  $\beta$ -actin (red dots) and cortactin (green dots) mRNA granules in live cells. Images were captured every 30 seconds for 5 minutes; playback is at 2 frames per second. Staining of the nuclei with Hoechst 33342 is shown in blue.

**Movie S5.** Time-lapse multicolor images of  $\beta$ -actin (red dots) and cortactin (green dots) mRNA granules in live cells. Images were captured every 1 minutes for 15 minutes; playback is at 2 frames per second. Staining of the nuclei with Hoechst 33342 is shown in blue.

**Movie S6.** Time-lapse multicolor images of  $\beta$ -actin (red dots) and cortactin (green dots) mRNA granules in live cells under a cellular stress condition. The cells shown in **Movie S3** were further treated with NaAsO<sub>2</sub> (500  $\mu$ M). Images were captured every 15 seconds for 6 minutes; playback is at 2 frames per second. Staining of the nuclei with Hoechst 33342 is shown in blue.

**Movie S7.** Time-lapse multicolor images of  $\beta$ -actin (red dots) and cortactin (green dots) mRNA granules in live cells under cellular stress induced by adding NaAsO<sub>2</sub> (500  $\mu$ M). Images were captured every 12 seconds for 10 minutes; playback is at 2 frames per second. Staining of the nuclei with Hoechst 33342 is shown in blue.

**Movie S8.** Time-lapse multicolor images of  $\beta$ -actin (red dots) and cortactin (green dots) mRNA granules in live cells under cellular stress induced by adding NaAsO<sub>2</sub> (500  $\mu$ M). Images were captured every 30 seconds for 13 minutes; playback is at 2 frames per second. Staining of the nuclei with Hoechst 33342 is shown in blue.

**Movie S9.** Time-lapse images without any aptamers in live cells. Images were captured every 12 seconds for 6 minutes; playback is at 2 frames per second. Staining of the nuclei with Hoechst 33342 is shown in blue.

## Supplementary Methods

### Chemical Synthesis

**General.** The solvents and chemicals for chemical syntheses were used as purchased, with no further purification. Synthetic method of probe **1** was described in our previous research<sup>[1]</sup>. Methoxytrityl-*N*-dPEG<sub>n</sub>-TFP ester reagents were purchased from Quanta BioDesign, Ltd. (Ohio, USA). SulfoCy3-NHS-ester Cy5-NHS-ester and sulfoCy5-NHS ester were purchased from Lumiprobe Co. (Florida, USA). TAMRA-SE was purchased from AAT Bioquest, Inc. (California, USA). ATTO465 NHS was purchased from ATTO-TEC GmbH (Siegen, Germany). DEAC-SE was purchased from AnaSpec, Inc. (California, USA). NDB-X-SE was purchased from Setareh Biotech, LLC. (Oregon, USA). 5-Carboxyfluorescein-*N*-hydroxysuccinimide ester was purchased from Toronto Research Chemicals (Ontario, Canada). BODIPY 558/568 NHS, Marina Blue SE and Oregon Green 488 carboxylic acid were purchased from Thermo Fisher Scientific Inc. (Massachusetts, USA). BHQ-1 amine<sup>[2]</sup>, Rhodamine Green-5-carboxylic acid<sup>[3]</sup>, and DY (deSO<sub>3</sub>-DY520-XL)<sup>[4]</sup> were synthesized according to the previous reports. All other solvents and chemicals were purchased from Wako Pure Chemical Industries, Ltd. (Osaka, Japan), Watanabe Chemical Industries, Ltd. (Hiroshima, Japan), Tokyo Chemical Industry Co., Ltd. (Tokyo, Japan) or Nacalai Tesque, Inc. (Kyoto, Japan).

High-performance liquid chromatography (HPLC) was performed with Shimadzu Prominence HPLC system. The synthetic molecules were purified by reversed-phase HPLC. HPLC conditions were as follows: GL science Inertsil® ODS-3 column (5 μm, 20 × 100 mm); solvent gradient, A, 0.1% trifluoroacetic acid (TFA) in H<sub>2</sub>O; B, 0.1% TFA in acetonitrile with gradient indicated below; flow rate, 4.0 mL/min; detector, 220/254/350/480/550/650 nm. HPLC grade reagents were used. NMR spectra were recorded on Bruker Avance III 600 (600 MHz), or JEOL JNM-ECP300 (300 MHz) NMR systems. High-resolution mass spectra were obtained using a Bruker FT-ICR MS Solarix in ESI mode.

### General procedure for synthesis of BHQ1-peg<sub>n</sub>-NH<sub>2</sub> intermediates S1-S3.

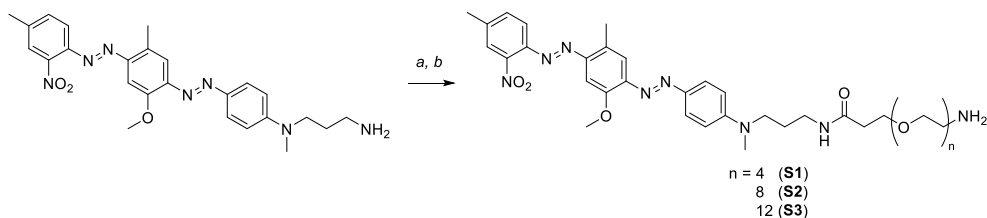

**Reagents and conditions:** a) Methoxytrityl-*N*-dPEG<sub>n</sub>-TFP ester, *i*Pr<sub>2</sub>NEt, DMSO, rt; b) TFA, rt.

Methoxytrityl-*N*-dPEG<sup>®</sup><sub>n</sub>-TFP ester (15 μmol) was added to a solution of BHQ1 amine (4.75 mg, 10 μmol) and *i*Pr<sub>2</sub>NEt (6.80 μL, 40 μmol) in DMSO (50 μL). After stirring for 3 h at room temperature, H<sub>2</sub>O (300 μL) and hexane (500 μL) were added to the mixture, and the resulting mixture was centrifuged (21,500 ×g for 10 min). After removal of supernatant, residual solid or oil was washed with H<sub>2</sub>O (500 μL). The residue was dried *in vacuo* and used for next step without further purification.

The dried residue was dissolved in TFA (400 μL). After stirring for 2 h at room temperature, the mixture was dried *in vacuo*. Resulting crude mixture was purified by preparative HPLC.

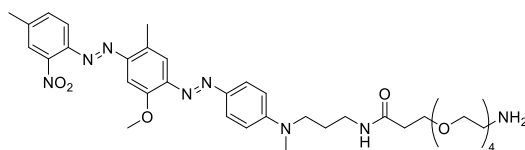

S1

**BHQ1-peg<sub>4</sub>-NH<sub>2</sub> (S1).** Methoxytrityl-*N*-dPEG<sup>®</sup><sub>4</sub>-TFP ester (10.3 mg, 15 μmol) converted according to the general procedure described above. Purification by HPLC (0–3 min: B, 55%; 3–15 min: B, 55–61% at RT, *t*<sub>R</sub> = 11.9 min) gave **S1** as a TFA salt (60% yield). <sup>1</sup>H-NMR (600 MHz, DMSO-*d*<sub>6</sub>) δ: 7.95–7.92 (2H, m), 7.79 (2H, d, *J* = 9.0 Hz), 7.76 (1H, d, *J* = 7.8 Hz), 7.71 (3H, brs), 7.70–7.67 (1H, m), 7.51 (1H, d, *J* = 0.6 Hz), 7.29 (1H, s), 6.85 (2H, d, *J* = 9.0 Hz), 3.92 (3H, s), 3.62 (2H, t, *J* = 6.6 Hz), 3.58 (2H, t, *J* = 4.8 Hz), 3.57–3.52 (4H, m), 3.51–3.46 (10H, m), 3.13 (2H, q, *J* = 6.6 Hz), 3.06 (3H, s), 3.00–2.94 (2H, m), 2.63 (3H, s), 2.54 (3H, s), 2.34 (2H, t, *J* = 6.6 Hz), 1.72 (2H, quint, *J* = 7.2 Hz). <sup>13</sup>C-NMR (150 MHz, DMSO-*d*<sub>6</sub>) δ: 170.02, 157.60, 157.40, 154.25, 151.68, 150.04, 146.29, 144.60, 143.43, 142.53, 142.19, 133.81, 132.12, 125.39, 124.18, 119.98, 118.39, 111.36, 99.10, 69.622, 69.616, 69.58, 69.53, 69.50, 69.42, 66.77, 66.54, 55.85, 49.30, 38.53, 38.21, 36.12, 36.07, 26.44, 20.58, 16.17. MS (ESI) calculated for C<sub>36</sub>H<sub>51</sub>N<sub>8</sub>O<sub>8</sub> [M+H]<sup>+</sup> 723.3824, observed 723.3821.

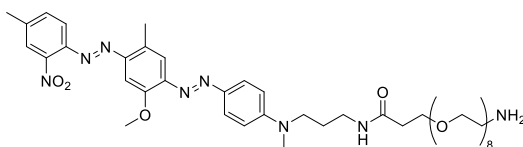

S2

**BHQ1-peg<sub>8</sub>-NH<sub>2</sub> (S2).** Methoxytrityl-*N*-dPEG<sup>®</sup><sub>8</sub>-TFP ester (12.9 mg, 15 μmol) converted according to the general procedure described above. Purification by HPLC (0–3 min: B, 55%; 3–23 min: B, 55–65% at RT, *t*<sub>R</sub> = 20.6 min) gave **S2** as a TFA salt (57% yield). <sup>1</sup>H-NMR (600 MHz, DMSO-*d*<sub>6</sub>) δ: 7.95–7.93 (1H, m), 7.92 (1H, t, *J* = 6.0 Hz), 7.90 (2H, d, *J* = 9.6 Hz), 7.76 (1H, d, *J* = 8.4 Hz), 7.71 (3H, brs), 7.70–7.67 (1H, m), 7.51 (1H, d, *J* = 0.6 Hz), 7.29 (1H, s), 6.85 (2H, d, *J* = 9.6 Hz), 3.92 (3H, s), 3.62 (2H, t, *J* = 6.6 Hz), 3.59 (2H, t, *J* = 4.8 Hz), 3.57–3.46 (30H, m), 3.13 (2H, q, *J* = 6.6 Hz), 3.06 (3H, s), 2.97 (2H, q, *J* = 6.0 Hz), 2.63 (3H, d, *J* = 0.6 Hz), 2.54 (3H, s), 2.34 (2H, t, *J* = 6.6 Hz).

Hz), 1.72 (2H, quint,  $J = 7.2$  Hz).  $^{13}\text{C}$ -NMR (150 MHz,  $\text{DMSO-}d_6$ )  $\delta$ : 169.99, 154.25, 151.68, 150.02, 146.29, 144.62, 143.43, 142.52, 142.19, 133.81, 132.12, 125.39, 124.18, 119.98, 118.38, 111.35, 99.09, 69.65, 69.63, 69.61, 69.58, 69.55, 69.51, 69.43, 66.79, 66.56, 55.84, 49.30, 39.97, 38.20, 36.12, 36.11, 26.44, 20.58, 16.16. MS (ESI) calculated for  $\text{C}_{44}\text{H}_{67}\text{N}_8\text{O}_{12}$   $[\text{M}+\text{H}]^+$  899.4873, observed 899.4873.

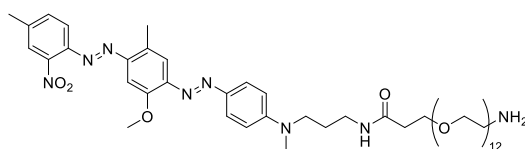

**S3**

**BHQ1-peg<sub>12</sub>-NH<sub>2</sub> (S3).** Methoxytrityl-*N*-dPEG<sup>®</sup><sub>12</sub>-TFP ester (15.6 mg, 15  $\mu\text{mol}$ ) converted according to the general procedure described above. Purification by HPLC (0–3 min: B, 60%; 3–17 min: B, 60–67% at RT,  $t_R = 14.9$  min) gave **S3** as a TFA salt (49% yield).  $^1\text{H}$ -NMR (600 MHz,  $\text{DMSO-}d_6$ )  $\delta$ : 7.94–7.93 (1H, m), 7.92 (1H, t,  $J = 6.0$  Hz), 7.90 (2H, d,  $J = 9.0$  Hz), 7.76 (1H, d,  $J = 7.8$  Hz), 7.73 (3H, brs), 7.70–7.67 (1H, m), 7.51 (1H, d,  $J = 0.6$  Hz), 7.29 (1H, s), 6.85 (2H, d,  $J = 9.0$  Hz), 3.92 (3H, s), 3.62 (2H, t,  $J = 6.6$  Hz), 3.59 (2H, t,  $J = 5.4$  Hz), 3.58–3.54 (4H, m), 3.52–3.47 (42H, m), 3.13 (2H, q,  $J = 6.6$  Hz), 3.06 (3H, s), 2.98 (2H, q,  $J = 6.0$  Hz), 2.63 (3H, d,  $J = 0.6$  Hz), 2.54 (3H, s), 2.34 (2H, t,  $J = 6.6$  Hz), 1.72 (2H, quint,  $J = 7.2$  Hz).  $^{13}\text{C}$ -NMR (150 MHz,  $\text{DMSO-}d_6$ )  $\delta$ : 169.99, 157.83, 157.62, 154.26, 151.68, 150.02, 146.30, 144.62, 143.43, 142.51, 142.19, 133.81, 132.13, 125.39, 124.17, 119.98, 118.39, 111.36, 99.08, 69.65, 69.64, 69.62, 69.59, 69.56, 69.52, 69.44, 66.80, 66.56, 55.84, 49.30, 43.67, 38.54, 38.20, 36.13, 36.11, 26.44, 20.58, 16.16. MS (ESI) calculated for  $\text{C}_{52}\text{H}_{83}\text{N}_8\text{NaO}_{16}$   $[\text{M}+\text{H}+\text{Na}]^{2+}$  549.2907, observed 549.2908.

#### General procedure for synthesis of BHQ1-fluorophore conjugated probes 2-5, 8, S4-S8.

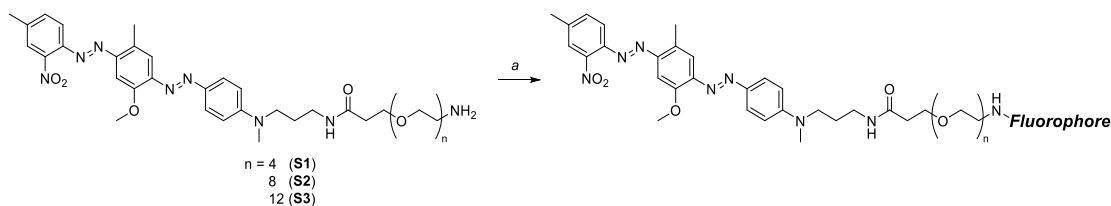

**Reagents and conditions:** a) fluorophore-NHS ester,  $i\text{Pr}_2\text{NEt}$ , DMSO, rt.

Fluorophore-NHS ester (1.1–1.5 eq.) was added to a solution of BHQ1-peg<sub>n</sub>-NH<sub>2</sub> (1 eq.) and  $i\text{Pr}_2\text{NEt}$  (4 eq.) in DMSO (20  $\mu\text{L}$ ). After stirring for 3–12 h at room temperature, the mixture was diluted with acetonitrile/ $\text{H}_2\text{O}$ /TFA (600  $\mu\text{L}$ , 47.5:47.5:5 solution) and the mixture was purified by preparative HPLC.

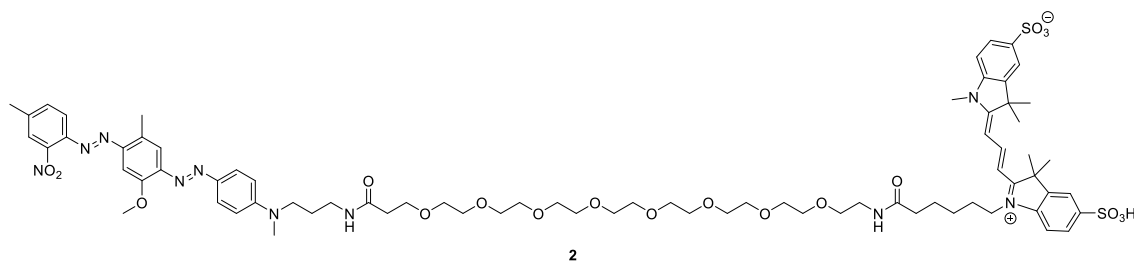

**BHQ1-peg<sub>8</sub>-sulfoCy3 (2).** BHQ1-peg<sub>8</sub>-NH<sub>2</sub> (**S2**) (0.50 μmol) and sulfoCy3-NHS (0.551 mg, 0.75 μmol) were converted according to the general procedure described above. Purification by HPLC (0–3 min: B, 45%; 3–20.5 min: B, 45–58% at RT,  $t_R$  = 22.0 min) gave **2** (22% yield). MS (ESI) calculated for C<sub>74</sub>H<sub>100</sub>N<sub>10</sub>Na<sub>2</sub>O<sub>19</sub>S<sub>2</sub> [M+2Na]<sup>2+</sup> 771.3196, observed 771.3183.

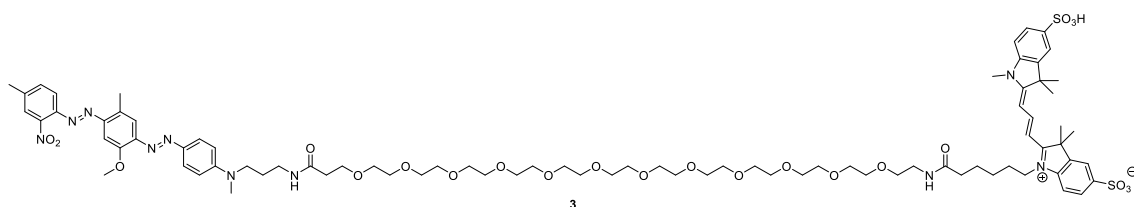

**BHQ1-peg<sub>12</sub>-sulfoCy3 (3).** BHQ1-peg<sub>12</sub>-NH<sub>2</sub> (**S3**) (0.50 μmol) and sulfoCy3-NHS (0.551 mg, 0.75 μmol) were converted according to the general procedure described above. Purification by HPLC (0–3 min: B, 45%; 3–28 min: B, 45–55% at RT,  $t_R$  = 24.9 min) gave **3** (16% yield). MS (ESI) calculated for C<sub>82</sub>H<sub>116</sub>N<sub>10</sub>Na<sub>2</sub>O<sub>23</sub>S<sub>2</sub> [M+2Na]<sup>2+</sup> 859.3720, observed 859.3703.

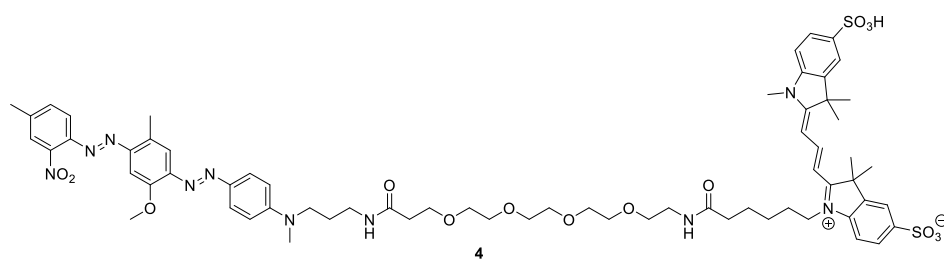

**BHQ1-peg<sub>4</sub>-sulfoCy3 (4).** BHQ1-peg<sub>4</sub>-NH<sub>2</sub> (**S1**) (0.25 μmol) and sulfoCy3-NHS (0.276 mg, 0.38 μmol) were converted according to the general procedure described above. Purification by HPLC (0–3 min: B, 50%; 3–23 min: B, 50–70% at RT,  $t_R$  = 18.2 min) gave **4** (19% yield). MS (ESI) calculated for C<sub>66</sub>H<sub>84</sub>N<sub>10</sub>Na<sub>2</sub>O<sub>15</sub>S<sub>2</sub> [M+2Na]<sup>2+</sup> 683.2672, observed 683.2670.

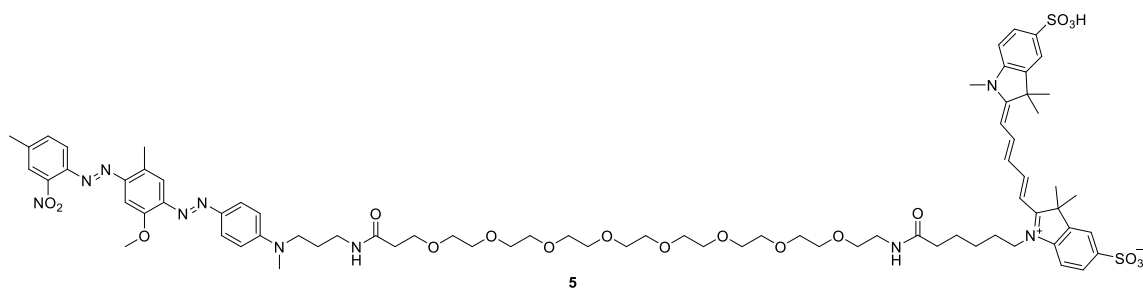

**BHQ1-peg<sub>8</sub>-sulfoCy5 (5).** BHQ1-peg<sub>8</sub>-NH<sub>2</sub> (**S2**) (0.25 μmol) and sulfoCy5-NHS (0.248 mg, 0.33 μmol) were converted according to the general procedure described above. Purification by HPLC (0–3 min: B, 45%; 3–21 min: B, 45–61% at RT,  $t_R$  = 19.2 min) gave **5** (79% yield). <sup>1</sup>H-NMR (600 MHz, DMSO-*d*<sub>6</sub>) δ: 8.34 (2H, dd, 13.2, 13.2), 7.94–7.90 (2H, m), 7.82–7.78 (1H, m), 7.81 (1H, s), 7.78 (2H, d,  $J$  = 9.0 Hz), 7.76 (1H, d,  $J$  = 8.4 Hz), 7.69–7.66 (1H, m), 7.66–7.62 (2H, m), 7.50 (1H, d,  $J$  = 0.6 Hz), 7.33–7.28 (2H, m), 7.28 (1H, s), 6.84 (2H, d,  $J$  = 9.0 Hz), 6.55 (1H, dd,  $J$  = 13.2, 13.2 Hz), 6.29 (1H, d,  $J$  = 13.2 Hz), 6.24 (1H, d,  $J$  = 13.2 Hz), 4.06 (2H, t,  $J$  = 7.2 Hz), 3.91 (3H, s), 3.61 (2H, t,  $J$  = 6.6 Hz), 3.58 (3H, s), 3.53–3.46 (32H, m), 3.40–3.30 (16H, m), 3.19–3.11 (4H, m), 3.05 (3H, s), 2.62 (3H, s), 2.33 (2H, t,  $J$  = 6.6 Hz), 2.05 (2H, t,  $J$  = 7.2 Hz), 1.75–1.65 (2H, m), 1.53 (2H, quint,  $J$  = 7.2 Hz), 1.37–1.29 (2H, m), 1.28–1.23 (2H, m). MS (ESI) calculated for C<sub>76</sub>H<sub>102</sub>N<sub>10</sub>NaO<sub>19</sub>S<sub>2</sub> [M+Na]<sup>2+</sup> 784.3274, observed 784.3270. Quantum yield (φ): 0.31%. Molar extinction coefficient (ε): 271000.

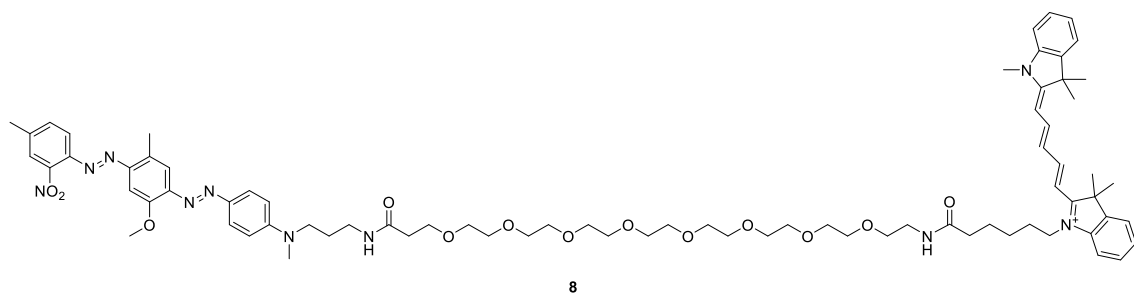

**BHQ1-peg<sub>8</sub>-Cy5 (8).** BHQ1-peg<sub>8</sub>-NH<sub>2</sub> (**S2**) (0.50 μmol) and Cy5-NHS (0.370 mg, 0.60 μmol) were converted according to the general procedure described above. Purification by HPLC (0–3 min: B, 55%; 3–33 min: B, 55–80% at RT,  $t_R$  = 29.1 min) gave **8** (76% yield). MS (ESI) calculated for C<sub>76</sub>H<sub>103</sub>N<sub>10</sub>NaO<sub>13</sub> [M+Na]<sup>2+</sup> 693.3796, observed 693.3791. Quantum yield (φ): 0.29%. Molar extinction coefficient (ε): 250000.



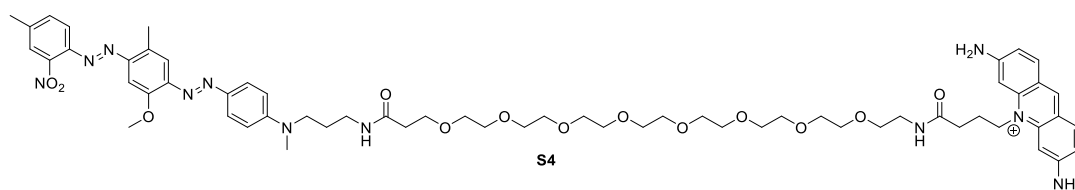

**BHQ1-peg<sub>8</sub>-ATTO465 (S4).** BHQ1-peg<sub>8</sub>-NH<sub>2</sub> (**S2**) (0.50 μmol) and ATTO465-NHS (0.271 mg, 0.55 μmol) were converted according to the general procedure described above. Purification by HPLC (0–3 min: B, 50%; 3–23 min: B, 50–60% at RT,  $t_R$  = 21.2 min) gave **S4** (83% yield). MS (ESI) calculated for C<sub>61</sub>H<sub>83</sub>N<sub>11</sub>O<sub>13</sub> [M+H]<sup>2+</sup> 588.8080, observed 588.8081.

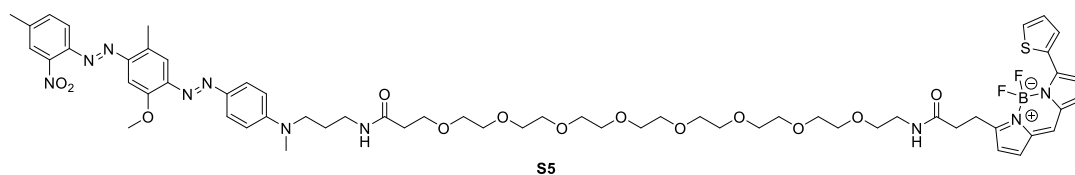

**BHQ1-peg<sub>8</sub>-BODIPY 558/568 (S5).** BHQ1-peg<sub>8</sub>-NH<sub>2</sub> (**S2**) (0.50 μmol) and BODIPY 558/568-NHS (0.266 mg, 0.60 μmol) were converted according to the general procedure described above. Purification by HPLC (0–3 min: B, 70%; 3–23 min: B, 70–78% at RT,  $t_R$  = 20.1 min) gave **S5** (4.7% yield). MS (ESI) calculated for C<sub>60</sub>H<sub>77</sub>BF<sub>2</sub>N<sub>10</sub>O<sub>13</sub>S [M+H]<sup>2+</sup> 613.2721, observed 613.2720.

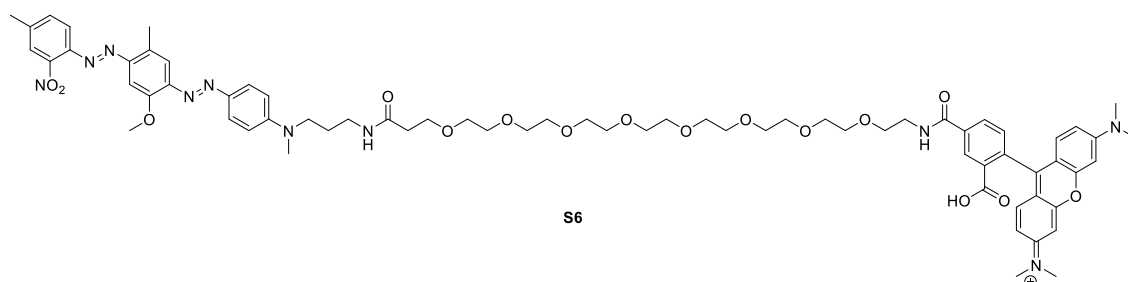

**BHQ1-peg<sub>8</sub>-TAMRA (S6).** BHQ1-peg<sub>8</sub>-NH<sub>2</sub> (**S2**) (0.50 μmol) and TAMRA-SE (0.271 mg, 0.55 μmol) were converted according to the general procedure described above. Purification by HPLC (0–3 min: B, 50%; 3–23 min: B, 50–60% at RT,  $t_R$  = 23.7 min) gave **S6** (quant.). MS (ESI) calculated for C<sub>69</sub>H<sub>87</sub>N<sub>10</sub>NaO<sub>16</sub> [M+Na]<sup>2+</sup> 667.3094, observed 667.3090.

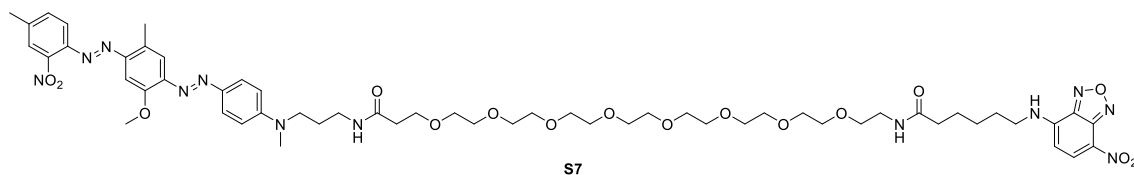

**BHQ1-peg<sub>8</sub>-NBD-X (S7).** BHQ1-peg<sub>8</sub>-NH<sub>2</sub> (**S2**) (0.25 μmol) and NBD-X-SE (0.147 mg, 0.38 μmol) were converted according to the general procedure described above. Purification by HPLC (0–3 min: B, 60%; 3–28 min: B, 60–85% at RT,  $t_R$  = 26.5 min) gave **S7** (14% yield). MS (ESI) calculated for C<sub>56</sub>H<sub>80</sub>N<sub>12</sub>O<sub>16</sub> [M+2H]<sup>2+</sup> 588.2902, observed 588.2904.

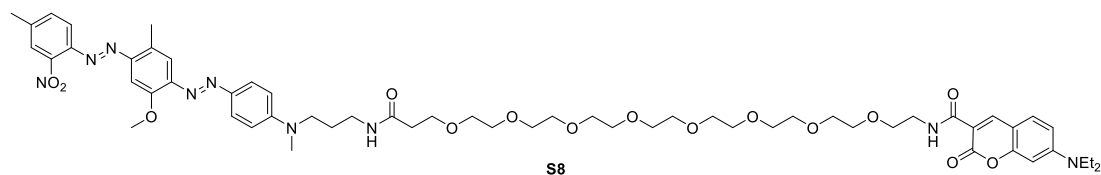

**BHQ1-peg<sub>8</sub>-DEAC (S8).** BHQ1-peg<sub>8</sub>-NH<sub>2</sub> (**S2**) (0.25  $\mu$ mol) and DEAC-SE (0.134 mg, 0.38  $\mu$ mol) were converted according to the general procedure described above. Purification by HPLC (0–3 min: B, 70%; 3–27 min: B, 70–86% at RT,  $t_s$  = 9.54 min) gave **S7** (12% yield). MS (ESI) calculated for C<sub>58</sub>H<sub>79</sub>N<sub>9</sub>NaO<sub>15</sub> [M+Na]<sup>+</sup> 1164.5588, observed 1164.5580.

#### Synthesis of DNB-peg<sub>2</sub>-fluorophore conjugated probes 6, S9–S14.

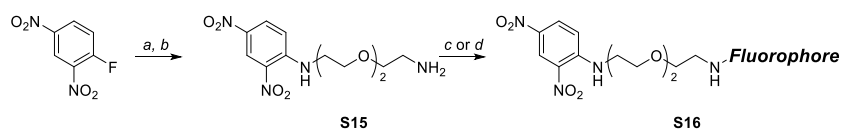

**Reagents and conditions:** a) BocNH-PEG<sub>2</sub>-NH<sub>2</sub>, *i*Pr<sub>2</sub>NEt, CH<sub>2</sub>Cl<sub>2</sub>, rt; b) 4 M HCl/AcOEt, rt; c) fluorophore-NHS ester, *i*Pr<sub>2</sub>NEt, DMSO, rt; d) fluorophore-CO<sub>2</sub>H, HATU, HOAt, *i*Pr<sub>2</sub>NEt, DMSO, rt.

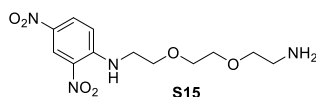

**DNB-peg<sub>2</sub>-NH<sub>2</sub> (S15).** 2,4-dinitrofluorobenzene (106  $\mu$ L 0.85 mmol) was added to a solution of BocNH-PEG<sub>n</sub>-NH<sub>2</sub> (233 mg, 0.94 mmol) and *i*Pr<sub>2</sub>NEt (288  $\mu$ L 1.7 mmol) in CH<sub>2</sub>Cl<sub>2</sub> (5 mL). After stirring for 2 h at room temperature, 0.2 M HCl aq. (20 mL) was added to the mixture, and the resulting mixture was extracted with CH<sub>2</sub>Cl<sub>2</sub> (10 mL  $\times$  3). The combined organic layer was washed with brine (10 mL), dried over Na<sub>2</sub>SO<sub>4</sub>, filtered, and evaporated. The residue was purified by silica gel column chromatography using hexane/AcOEt (77:23 to 19:81) as eluent, to give DNB-peg<sub>2</sub>-NHBoc (322 mg, 92% yield). <sup>1</sup>H-NMR (300 MHz, CDCl<sub>3</sub>)  $\delta$ : 9.15 (1H, d,  $J$  = 2.8 Hz), 8.82 (1H, brs), 8.29 (1H, dd,  $J$  = 2.8, 9.3), 6.94 (1H, d,  $J$  = 9.3), 4.97 (1H, brs), 3.84 (2H, t,  $J$  = 5.4), 3.75–3.50 (m, 8H), 3.33 (2H, q,  $J$  = 4.8), 1.43 (9H, s).

DNB-peg<sub>2</sub>-NHBoc (322 mg, 0.78 mmol) was dissolved in 4 M HCl/AcOEt (5 mL) and stirred at room temperature for 3 h. The resulting solid was collected by filtration to give **S15** as a HCl salt (236 mg, 86% yield). <sup>1</sup>H-NMR (300 MHz, DMSO-*d*<sub>6</sub>)  $\delta$ : 8.87 (1H, d,  $J$  = 2.4 Hz), 8.87–8.83 (1H, m), 8.28 (1H, dd,  $J$  = 2.4, 9.6 Hz), 7.97 (3H, brs), 7.30 (1H, d,  $J$  = 9.6 Hz), 3.75–3.66 (4H, m), 3.65–3.55 (6H, m), 2.94 (2H, q,  $J$  = 5.4 Hz). MS (ESI) calculated for C<sub>12</sub>H<sub>19</sub>N<sub>4</sub>O<sub>6</sub> [M+H]<sup>+</sup> 315.1299, observed 315.1299.

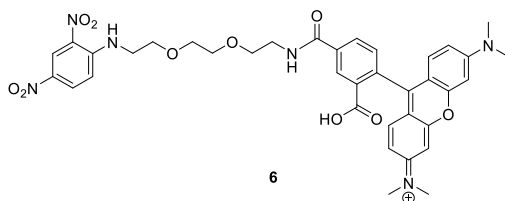

**NB-peg<sub>2</sub>-TAMRA (6).** TAMRA-SE (0.158 mg, 0.30  $\mu\text{mol}$ ) was added to a solution of DNB-peg<sub>2</sub>-NH<sub>2</sub> (**S15**) (0.0875 mg, 0.25  $\mu\text{mol}$ ) and *i*Pr<sub>2</sub>NEt (0.170  $\mu\text{L}$  1.0  $\mu\text{mol}$ ) in DMSO (20  $\mu\text{L}$ ). After stirring for 12 h at room temperature, the mixture was diluted with acetonitrile/H<sub>2</sub>O/TFA (600  $\mu\text{L}$ , 47.5:47.5:5 solution) and the mixture was purified by preparative HPLC (0–3 min: B, 40%; 3–21 min: B, 40–49% at RT,  $t_R$  = 20.9 min) gave **6** (84% yield). <sup>1</sup>H-NMR (600 MHz, DMSO-*d*<sub>6</sub>)  $\delta$ : 13.31 (1H, brs), 8.92–8.87 (1H, m), 8.85 (1H, t,  $J$  = 5.4 Hz), 8.83 (1H, d,  $J$  = 2.4 Hz), 8.63 (1H, brs), 8.26 (1H, d,  $J$  = 7.8 Hz), 8.23 (1H, ddd,  $J$  = 0.6, 2.4, 9.6 Hz), 7.51 (1H, brs), 7.26 (1H, d,  $J$  = 9.6 Hz), 7.23–6.64 (5H, m), 6.53 (1H, m), 3.72 (2H, t,  $J$  = 5.4 Hz), 3.65 (2H, t,  $J$  = 5.4 Hz), 3.65–3.59 (4H, m), 3.59 (2H, t,  $J$  = 6.0 Hz), 3.53–3.45 (2H, m), 3.22 (12H, brs). MS (ESI) calculated for C<sub>37</sub>H<sub>39</sub>N<sub>6</sub>O<sub>10</sub> [M]<sup>+</sup> 727.2722, observed 727.2714.

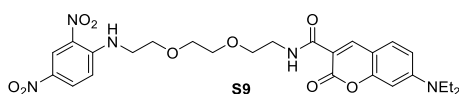

**DNB-peg<sub>2</sub>-DEAC (S9).** DEA-SE (0.128 mg, 0.30  $\mu\text{mol}$ ) was added to a solution of DNB-peg<sub>2</sub>-NH<sub>2</sub> (**S15**) (0.0875 mg, 0.25  $\mu\text{mol}$ ) and *i*Pr<sub>2</sub>NEt (0.170  $\mu\text{L}$  1.0  $\mu\text{mol}$ ) in DMSO (20  $\mu\text{L}$ ). After stirring for 10 h at room temperature, the mixture was diluted with acetonitrile/H<sub>2</sub>O/TFA (600  $\mu\text{L}$ , 47.5:47.5:5 solution) and the mixture was purified by preparative HPLC (0–3 min: B, 45%; 3–33 min: B, 45–75% at RT,  $t_R$  = 32.0 min) gave **S9** (41% yield). MS (ESI) calculated for C<sub>26</sub>H<sub>31</sub>N<sub>5</sub>NaO<sub>9</sub> [M+Na]<sup>+</sup> 580.2014, observed 580.2014.

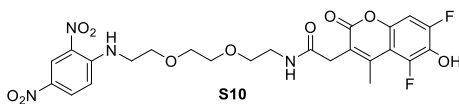

**DNB-peg<sub>2</sub>-Marina Blue (S10).** Marina Blue-SE (0.110 mg, 0.30  $\mu\text{mol}$ ) was added to a solution of DNB-peg<sub>2</sub>-NH<sub>2</sub> (**S15**) (0.0875 mg, 0.25  $\mu\text{mol}$ ) and *i*Pr<sub>2</sub>NEt (0.170  $\mu\text{L}$  1.0  $\mu\text{mol}$ ) in DMSO (20  $\mu\text{L}$ ). After stirring for 10 h at room temperature, the mixture was diluted with acetonitrile/H<sub>2</sub>O/TFA (600  $\mu\text{L}$ , 47.5:47.5:5 solution) and the mixture was purified by preparative HPLC (0–3 min: B, 45%; 3–28 min: B, 45–70% at RT,  $t_R$  = 18.5 min) gave **S10** (41% yield). MS (ESI) calculated for C<sub>24</sub>H<sub>24</sub>F<sub>2</sub>N<sub>4</sub>NaO<sub>10</sub> [M+Na]<sup>+</sup> 589.1353, observed 589.1353.

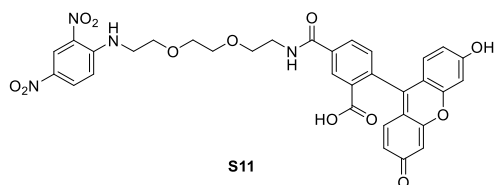

**DNB-peg<sub>2</sub>-fluorescein (S11).** 5-Carboxyfluorescein-N-hydroxysuccinimide Ester (0.142 mg, 0.30  $\mu$ mol) was added to a solution of DNB-peg<sub>2</sub>-NH<sub>2</sub> (**S15**) (0.0875 mg, 0.25  $\mu$ mol) and *i*Pr<sub>2</sub>NEt (0.170  $\mu$ L 1.0  $\mu$ mol) in DMSO (20  $\mu$ L). After stirring for 10 h at room temperature, the mixture was diluted with acetonitrile/H<sub>2</sub>O/TFA (600  $\mu$ L, 47.5:47.5:5 solution) and the mixture was purified by preparative HPLC (0–3 min: B, 45%; 3–28 min: B, 45–70% at RT,  $t_R$  = 20.2 min) gave **S11** (53% yield). MS (ESI) calculated for C<sub>33</sub>H<sub>28</sub>N<sub>4</sub>NaO<sub>12</sub> [M+Na]<sup>+</sup> 695.1596, observed 695.1594.

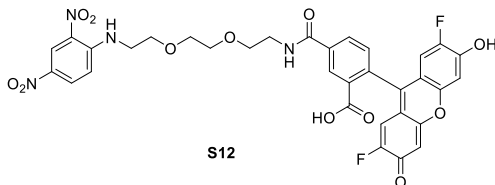

**DNB-peg<sub>2</sub>-Oregon Green 488 (S12).** *i*Pr<sub>2</sub>NEt (0.170  $\mu$ L 1.0  $\mu$ mol) was added to a solution of Oregon Green 488 carboxylic acid (0.124 mg, 0.30  $\mu$ mol), HATU (0.190 mg, 0.50  $\mu$ mol), HOAt (0.0681 mg, 0.50  $\mu$ mol) and DNB-peg<sub>2</sub>-NH<sub>2</sub> (**S15**) (0.0875 mg, 0.25  $\mu$ mol) in DMSO (20  $\mu$ L). After stirring for 10 h at room temperature, the mixture was diluted with acetonitrile/H<sub>2</sub>O/TFA (600  $\mu$ L, 47.5:47.5:5 solution) and the mixture was purified by preparative HPLC (0–3 min: B, 45%; 3–28 min: B, 45–70% at RT,  $t_R$  = 21.9 min) gave **S12** (25% yield). MS (ESI) calculated for C<sub>33</sub>H<sub>26</sub>F<sub>2</sub>N<sub>4</sub>NaO<sub>12</sub> [M+Na]<sup>+</sup> 731.1407, observed 731.1406.

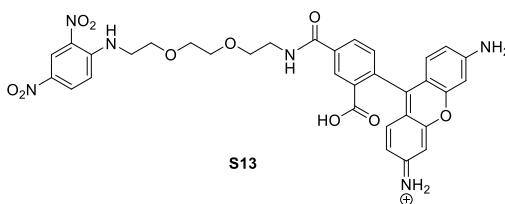

**DNB-peg<sub>2</sub>-Rhodamine Green (S13).** *i*Pr<sub>2</sub>NEt (0.170  $\mu$ L 1.0  $\mu$ mol) was added to a solution of Rhodamine Green-5-carboxylic acid (0.147 mg, 0.30  $\mu$ mol), HATU (0.190 mg, 0.50  $\mu$ mol), HOAt (0.0681 mg, 0.50  $\mu$ mol) and DNB-peg<sub>2</sub>-NH<sub>2</sub> (**S15**) (0.0875 mg, 0.25  $\mu$ mol) in DMSO (20  $\mu$ L). After stirring for 10 h at room temperature, the mixture was diluted with acetonitrile/H<sub>2</sub>O/TFA (600  $\mu$ L, 47.5:47.5:5 solution) and the mixture was purified by preparative HPLC (0–3 min: B, 40%; 3–28 min: B, 40–65% at RT,  $t_R$  = 11.9 min) gave **S13** (22% yield). MS (ESI) calculated for C<sub>33</sub>H<sub>31</sub>N<sub>6</sub>O<sub>10</sub> [M]<sup>+</sup> 671.2096, observed 671.2093.

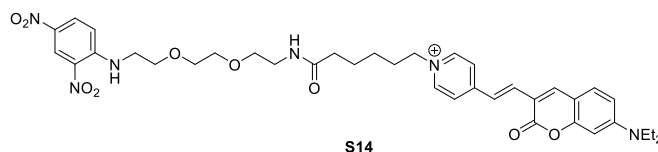

**DNB-peg<sub>2</sub>-DY (S14).** *i*Pr<sub>2</sub>NEt (0.170  $\mu$ L 1.0  $\mu$ mol) was added to a solution of deSO<sub>3</sub>-DY520-XL (0.163 mg, 0.30  $\mu$ mol), HATU (0.190 mg, 0.50  $\mu$ mol), HOAt (0.0681 mg, 0.50  $\mu$ mol) and DNB-peg<sub>2</sub>-NH<sub>2</sub> (**S15**) (0.0875 mg, 0.25  $\mu$ mol) in DMSO (20  $\mu$ L). After stirring for 16.5 h at room temperature, the mixture was diluted with acetonitrile/H<sub>2</sub>O/TFA (600  $\mu$ L, 47.5:47.5:5 solution) and the mixture was purified by preparative HPLC (0–3 min: B, 50%; 3–23 min: B, 50–60% at RT,  $t_R$  = 15.0 min) gave **S14** (62% yield).

#### Synthesis of DNB-peg<sub>7</sub>-DY conjugated probe 7.

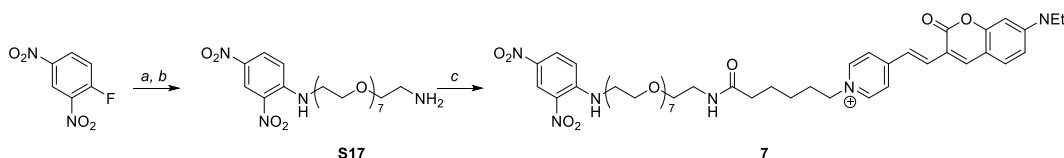

**Reagents and conditions:** a) BocNH-PEG<sub>7</sub>-NH<sub>2</sub>, *i*Pr<sub>2</sub>NEt, CH<sub>3</sub>CN, rt; b) 4 M HCl/AcOEt/AcOEt (3:1), rt; c) deSO<sub>3</sub>-DY520-XL, HATU, HOAt, *i*Pr<sub>2</sub>NEt, DMSO, rt.

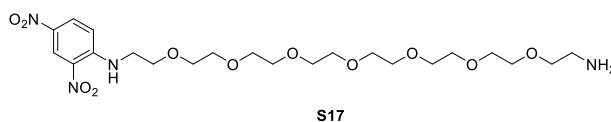

**DNB-peg<sub>7</sub>-NH<sub>2</sub> (S17).** 2,4-dinitrofluorobenzene (0.628  $\mu$ L 5.0  $\mu$ mol) was added to a solution of BocNH-PEG<sub>n</sub>-NH<sub>2</sub> (2.81 mg, 6.0  $\mu$ mol) and *i*Pr<sub>2</sub>NEt (1.70  $\mu$ L 10  $\mu$ mol) in CH<sub>3</sub>CN (50  $\mu$ L). After stirring for 2 h at room temperature, 0.2 M HCl aq. (200  $\mu$ L) was added to the mixture, and the resulting mixture was extracted with CH<sub>2</sub>Cl<sub>2</sub> (200  $\mu$ L  $\times$  4). The combined organic layer was washed with brine (100  $\mu$ L), dried over Na<sub>2</sub>SO<sub>4</sub>, filtered, and evaporated. The residue was dissolved in 4 M HCl/AcOEt (300  $\mu$ L) / AcOEt (100  $\mu$ L) and stirred at room temperature for 2 h. Hexane (2 mL) was added to the mixture, and the resulting mixture was centrifuged (21,500  $\times g$  for 10 min). After removal of supernatant, residual oil was used for next step without further purification. to give **S17** as a HCl salt. <sup>1</sup>H-NMR (600 MHz, DMSO-*d*<sub>6</sub>)  $\delta$ : 8.87 (1H, d,  $J$  = 3.0 Hz), 8.86–8.84 (1H, m), 8.27 (1H, ddd,  $J$  = 0.6, 3.0, 9.6 Hz), 7.74 (3H, brs), 7.29 (1H, d,  $J$  = 9.6 Hz), 3.71–3.65 (4H, m), 3.60–3.47 (26H, m), 2.97 (2H, t,  $J$  = 5.4 Hz). <sup>13</sup>C-NMR (150 MHz, DMSO-*d*<sub>6</sub>)  $\delta$ : 148.29, 134.81, 129.79, 129.58, 123.47, 115.60, 69.70, 69.69, 69.65, 69.64, 69.62, 69.55, 69.51, 42.57, 38.53. MS (ESI) calculated for C<sub>22</sub>H<sub>39</sub>N<sub>4</sub>O<sub>11</sub> [M+H]<sup>+</sup> 535.2610, observed 535.2607.

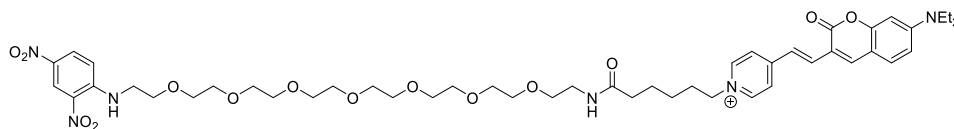

7

**DNB-peg<sub>7</sub>-DY (7).** *i*Pr<sub>2</sub>NEt (0.170  $\mu$ L 1.0  $\mu$ mol) was added to a solution of deSO<sub>3</sub>-DY520-XL (0.163 mg, 0.30  $\mu$ mol), HATU (0.190 mg, 0.50  $\mu$ mol), HOAt (0.0681 mg, 0.50  $\mu$ mol) and DNB-peg<sub>2</sub>-NH<sub>2</sub> (**S15**) (0.0875 mg, 0.25  $\mu$ mol) in DMSO (20  $\mu$ L). After stirring for 16.5 h at room temperature, the mixture was diluted with acetonitrile/H<sub>2</sub>O/TFA (600  $\mu$ L, 47.5:47.5:5 solution) and the mixture was purified by preparative HPLC (0–3 min: B, 50%; 3–23 min: B, 50–60% at RT,  $t_R$  = 15.7 min) gave **S14** as a TFA salt (62% yield). <sup>1</sup>H-NMR (600 MHz, DMSO-*d*<sub>6</sub>)  $\delta$ : 8.87–8.82 (4H, m), 8.25 (1H, ddd  $J$  = 0.6, 2.4, 9.6 Hz), 8.21 (1H, s), 8.16 (2H, d,  $J$  = 9.6 Hz), 7.85–7.81 (2H, m), 7.68 (1H, d,  $J$  = 16.2 Hz), 7.54 (1H, d,  $J$  = 9.0 Hz), 7.27 (1H, d,  $J$  = 9.6 Hz), 6.80 (1H, dd,  $J$  = 2.4, 9.0 Hz), 6.60 (1H, d,  $J$  = 2.4 Hz), 6.53 (1H, brs), 4.45 (2H, t,  $J$  = 7.2 Hz), 3.70–3.63 (4H, m), 3.59–3.56 (2H, m), 3.54–3.44 (26H, m), 3.17 (2H, q,  $J$  = 6.0 Hz), 2.07 (2H, t,  $J$  = 7.2 Hz), 1.89 (2H, quint,  $J$  = 7.2 Hz), 1.53 (2H, quint,  $J$  = 7.2 Hz), 1.28–1.18 (4H, m), 1.15 (6H, t,  $J$  = 7.2 Hz). <sup>13</sup>C-NMR (150 MHz, DMSO-*d*<sub>6</sub>)  $\delta$ : 171.83, 159.48, 156.22, 153.22, 151.90, 148.26, 145.32, 143.83, 136.87, 134.78, 130.65, 129.76, 129.53, 123.43, 123.19, 122.49, 115.55, 113.52, 109.95, 108.25, 96.12, 69.69, 69.65, 69.64, 69.63, 69.60, 69.44, 69.03, 59.20, 44.27, 38.32, 34.74, 30.12, 24.86, 24.35, 12.26. MS (ESI) calculated for C<sub>48</sub>H<sub>67</sub>N<sub>6</sub>O<sub>14</sub> [M]<sup>+</sup> 951.4710, observed 951.4707. Quantum yield ( $\phi$ ): 6.7%. Molar extinction coefficient ( $\epsilon$ ): 49244.

## General procedure

UV-vis absorption spectra in a binding buffer (10 mM Tris-HCl, 100 mM KCl, 5 mM MgCl<sub>2</sub>, pH 7.6) were measured using a U-3010 spectrophotometer (Hitachi High-Technologies Corp.). Fluorescence spectra were recorded using an LS 55 Fluorescence spectrometer (PerkinElmer Co., Ltd.). The live-cell and fixed cell imaging were performed using a CellVoyager™ CV1000 Confocal Scanner Box (Yokogawa Electric Corp.), equipped with an ultra-sensitive EMCCD C\_9100 13 camera (512 × 512 pixels) and an Olympus UPLSAPO 60XO 1.35 NA oil objective. The excitation laser wavelength and emission filter were as follows: excitation 405 and emission BP477/60 nm for detection of Hoechst signal; excitation 488 and emission BP617/73 nm for detection of probe **7** (DY); excitation 561 and emission BP617/73 nm for detection of probes **5** (sulfoCy5) and **8** (Cy5). The images were analyzed using CellVoyager™ CV1000 measurement software and NIH ImageJ, and presented as maximum-intensity projection (MIP) or the best focus single plane.

The BHQ1-binding aptamer A1 was prepared as described in a previous report<sup>[1,5]</sup>. The dsDNAs for T7 transcription of DNB-binding aptamer were PCR amplified using corresponding pUC19 plasmids as a template, with primer sets described in **Table S4** (see Method for *in vitro* selection procedures for DNB-binding aptamer). The dsDNA templates for the DNB-binding aptamer and DNB-short aptamers were prepared by PCR, amplified using pUC19-DNB1 plasmid as a template, with the primer set described in **Table S4**. The dsDNA template for the mutated version of DNB-short aptamer (DNB short mut) was prepared by PCR, amplified using dsDNA from annealing of two synthetic ssDNAs (**Table S4**) as a template, with the primer set described in **Table S4**. The dsDNA templates for the RNA aptamers and target RNAs were prepared by annealing of two synthetic ssDNAs (**Table S4**). RNAs for *in vitro* experiments were prepared by *in vitro* transcription reaction at 37°C for 12 h using T7 MegaScript kit (invitrogen), and purified using an NAP-5 column to remove unincorporated NTPs. The dsDNA templates of the RNA aptamers that were responsive to β-actin or cortactin were prepared by annealing two synthetic ssDNAs (**Table S4**). The dsDNAs were subcloned into the *Bgl* II and *Hind* III sites in pSuper.neo vector. Synthetic ssDNAs were purchased from Thermo Fisher Scientific Inc. (Massachusetts, USA).

**Fluorescence measurement.** Fluorescence spectra of each probe (2 μM) were obtained in binding buffer (10 mM Tris-HCl, 100 mM KCl, 5 mM MgCl<sub>2</sub>, pH 7.6), in the absence or presence of RNA aptamer and target RNA (annealed before mixing with probe). The excitation wavelengths and fluorescence emissions (Ex/Em) monitored for each conjugates were 520/540-700 nm for probes **1–4**, **6**, **S5**, and **S6**; 620/640-800 nm for probe **5**; 430/450-600 nm for probes **S4** and **S7**; 390/420-600 nm for probes **S8–S10**; 480/500-650 nm for probes **S11–S13**; and 500/550-800 nm for probes **7** and **S14**.

***In vitro* selection procedures for DNB binding aptamer (Figure S7).** BHQ1-immobilized affinity resin was prepared as described in a previous report<sup>[1,5]</sup>. DNB-peg<sub>2</sub>-NH<sub>2</sub> (**S15**) was immobilized to EAH Sepharose™ 4B resin, linked by diglycolic acid to give DNB-immobilized affinity resin. The dsDNA library for templates of the 1<sup>st</sup> round RNA pool was prepared by Klenow reaction of template and reverse primer (**Table S4**). The dsDNA template was converted to an RNA pool by *in vitro* transcription reaction at 37°C for 12 h, using T7 MegaScript kit (Invitrogen), and purified using an NAP-5 column. The resulting RNA pool was annealed in binding buffer (200 µL for 1<sup>st</sup> round, 100 µL for 2<sup>nd</sup> and additional rounds, 10 mM Tris-HCl, 100 mM KCl, pH 7.6). After addition of 1 µL of MgCl<sub>2</sub> solution (final concentration, 5 mM), the solution was incubated on the BHQ1-immobilized affinity resin for 15 minutes at 4°C. The unbound RNA species were drained, and the pass-through fraction was incubated on the DNB-immobilized affinity resin for 30 minutes at 4°C. The unbound RNA species were drained, and the resin was washed 8 times with a binding buffer to remove the non-binding species. Bound RNA species were eluted using binding buffer saturated with free DNB-peg<sub>2</sub>-NH<sub>2</sub> solution (1 mM), 3 times for 10 min each. The eluted fractions were pooled and precipitated with ethanol. The selected RNAs were reverse-transcribed using ReverTra Ace® (Toyobo Co., Ltd.), and the resulting cDNA was PCR-amplified with the forward and the reverse primers in **Table S4**. The DNA templates were transcribed *in vitro*, and the resulting RNAs were subjected to the next round of selection. After eight rounds of selection, enriched RNAs were reverse-transcribed, and converted to dsDNA by PCR. The resulting DNAs were ligated into pUC19 at the *Eco*RI and *Bam*HI sites, and transformed to stellar competent cells of an *E. coli* strain (Takara Bio Inc.). The resulting clones were isolated and sequenced.

**K<sub>d</sub> determination.** Probe **6** (2 µM) was dissolved in the binding buffer in the presence of RNA (0, 1, 3, 10, 30 or 100 µM), and fluorescence intensity was measured using an MTP-800 multi microplate reader (CORONA) with an Ex/Em = 550/610 nm filter set. The K<sub>d</sub> values of DNB1-DNB4 were estimated from the fluorescence titration data, using the equation:

$$F_{\text{obs}} = A \left( \frac{[6]_{\text{T}} + [\text{aptamer}]_{\text{T}} + K_{\text{d}}}{2} - \left( \frac{[6]_{\text{T}} + [\text{aptamer}]_{\text{T}} + K_{\text{d}}}{2} \right)^2 - 4[6]_{\text{T}}[\text{aptamer}]_{\text{T}} \right)^{1/2} / 2[6]_{\text{T}}$$

where *A* is the increase in fluorescence at saturating DNB1 concentration (*F* max - *F* min), *K<sub>d</sub>* is the dissociation constant, and [6]<sub>T</sub> and [aptamer]<sub>T</sub> are the total concentrations of probe **6** and aptamer DNB1-DNB4, respectively.

**Cell culture and DNA transfection.** HeLa cells were maintained in Dulbecco's modified Eagle medium (Gibco®), supplemented with 100 units/mL penicillin, 100 µg/mL streptomycin sulfate, and 10% (v/v) fetal bovine serum (Biowest), at 37°C and 5% CO<sub>2</sub> in a humidified incubator. The cells



were transfected with the aptamer expression plasmids using FuGENE HD transfection reagent (Promega), according to the manufacturer's protocol. To induce stress, 0.05 M sodium arsenite solution (Sigma-Aldrich Co., LLC) was added (final concentration, 500  $\mu$ M). The stress-induced cells were used immediately for live-cell experiments, and after 1 h incubation for fixed-cell experiments.

**Fixed cell imaging.** HeLa cells were seeded on a Poly-D-lysine coated glass-bottom ViewPlate®-96F microplate (PerkinElmer, Inc.) at  $3.0\text{--}5.0 \times 10^3$  cells per well. After day 1, cells were fixed with 4% paraformaldehyde solution (Muto Pure Chemicals Co., Ltd) at room temperature for 15 min, washed twice with PBS, and then permeabilized with methanol overnight at  $-20^\circ\text{C}$ . The cells were soaked in  $2\times$  SSC buffer (300 mM NaCl, 30 mM sodium citrate, pH 7.0) containing 50% formamide at  $50^\circ\text{C}$  for 15 min. The cells were then incubated at  $4^\circ\text{C}$  for 24 h with a  $2\times$  SSC buffer (50  $\mu$ L), containing 10  $\mu$ M aptamers, 10% dextran sulfate, 0.02% RNase-free BSA, and 40  $\mu$ g *E. coli* tRNA. Excess aptamers were washed out twice with  $2\times$  SSC buffer. The cells were then treated at  $4^\circ\text{C}$  for 5 min with probes **5** (2  $\mu$ M) and **7** (2  $\mu$ M), and DAPI (2  $\mu$ g/mL) in  $2\times$  SSC buffer (30  $\mu$ L). Excess probes were washed out with  $2\times$  SSC buffer, and the cells were observed on CV1000 microscope. The cell images were taken with a vertical range of 2  $\mu$ m, and each image stack was then projected onto a single plane.

**Live-cell imaging.** On day 0, HeLa cells were seeded on a 12-well plate at  $5.0 \times 10^4$  cells per well. On day 1, the cells were transfected with pSuper.neo vectors encoding each aptamer. On day 2, the cells were detached with 0.25% trypsin, and re-seeded at  $1.0 \times 10^4$  cells per cell on CELLVIEW™ glass bottom cell culture dishes (Greiner Bio One International GmbH, 4 compartments, 35 mm, pre-coated with advanced TC) in the complete growth medium, then incubated at  $37^\circ\text{C}$  for 10 min in a humidified 5%  $\text{CO}_2$  incubator. After the cells attached to the plate, they were stained with probes **7** (5  $\mu$ M) and **8** (5  $\mu$ M), and Hoechst 33342 (1  $\mu$ g/mL) in the complete growth medium (100  $\mu$ L), and incubated at  $37^\circ\text{C}$  for 5 min in a humidified 5%  $\text{CO}_2$  incubator. The medium was then changed to Medium 199, Hank's Balanced Salts (Gibco®), and the cells were observed on a CV1000 microscope. Live-cell images were collected as 4  $\mu$ m of vertical z-stack range (~11 focal planes), and presented as MIP. Time-lapse images were taken at 0-30 s intervals for up to 10 minutes.

## Supplementary References

- (1) Murata, A.; Sato, S.; Kawazoe, Y.; Uesugi, M. *Chem. Commun.* **2011**, 47, 4712–4714.
- (2) Jing, C.; Cornish, V. W. *ACS Chem. Biol.* **2013**, 8, 1704–1712.
- (3) Grimm, J. B.; Lavis, L. D. *Org. Lett.* **2011**, 13, 6354–6357.
- (4) Peter Czerney, Matthias Wenzel, Bernd Schweder, F. L. US20040260093A1, 2004.
- (5) Sato, S.; Yatsuzuka, K.; Katsuda, Y.; Uesugi, M. *Methods Mol. Biol.* **2018**, 1649, 305–318.

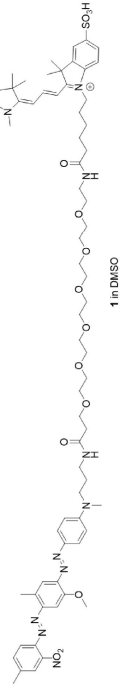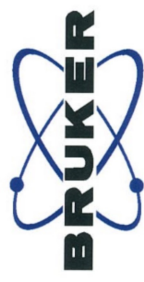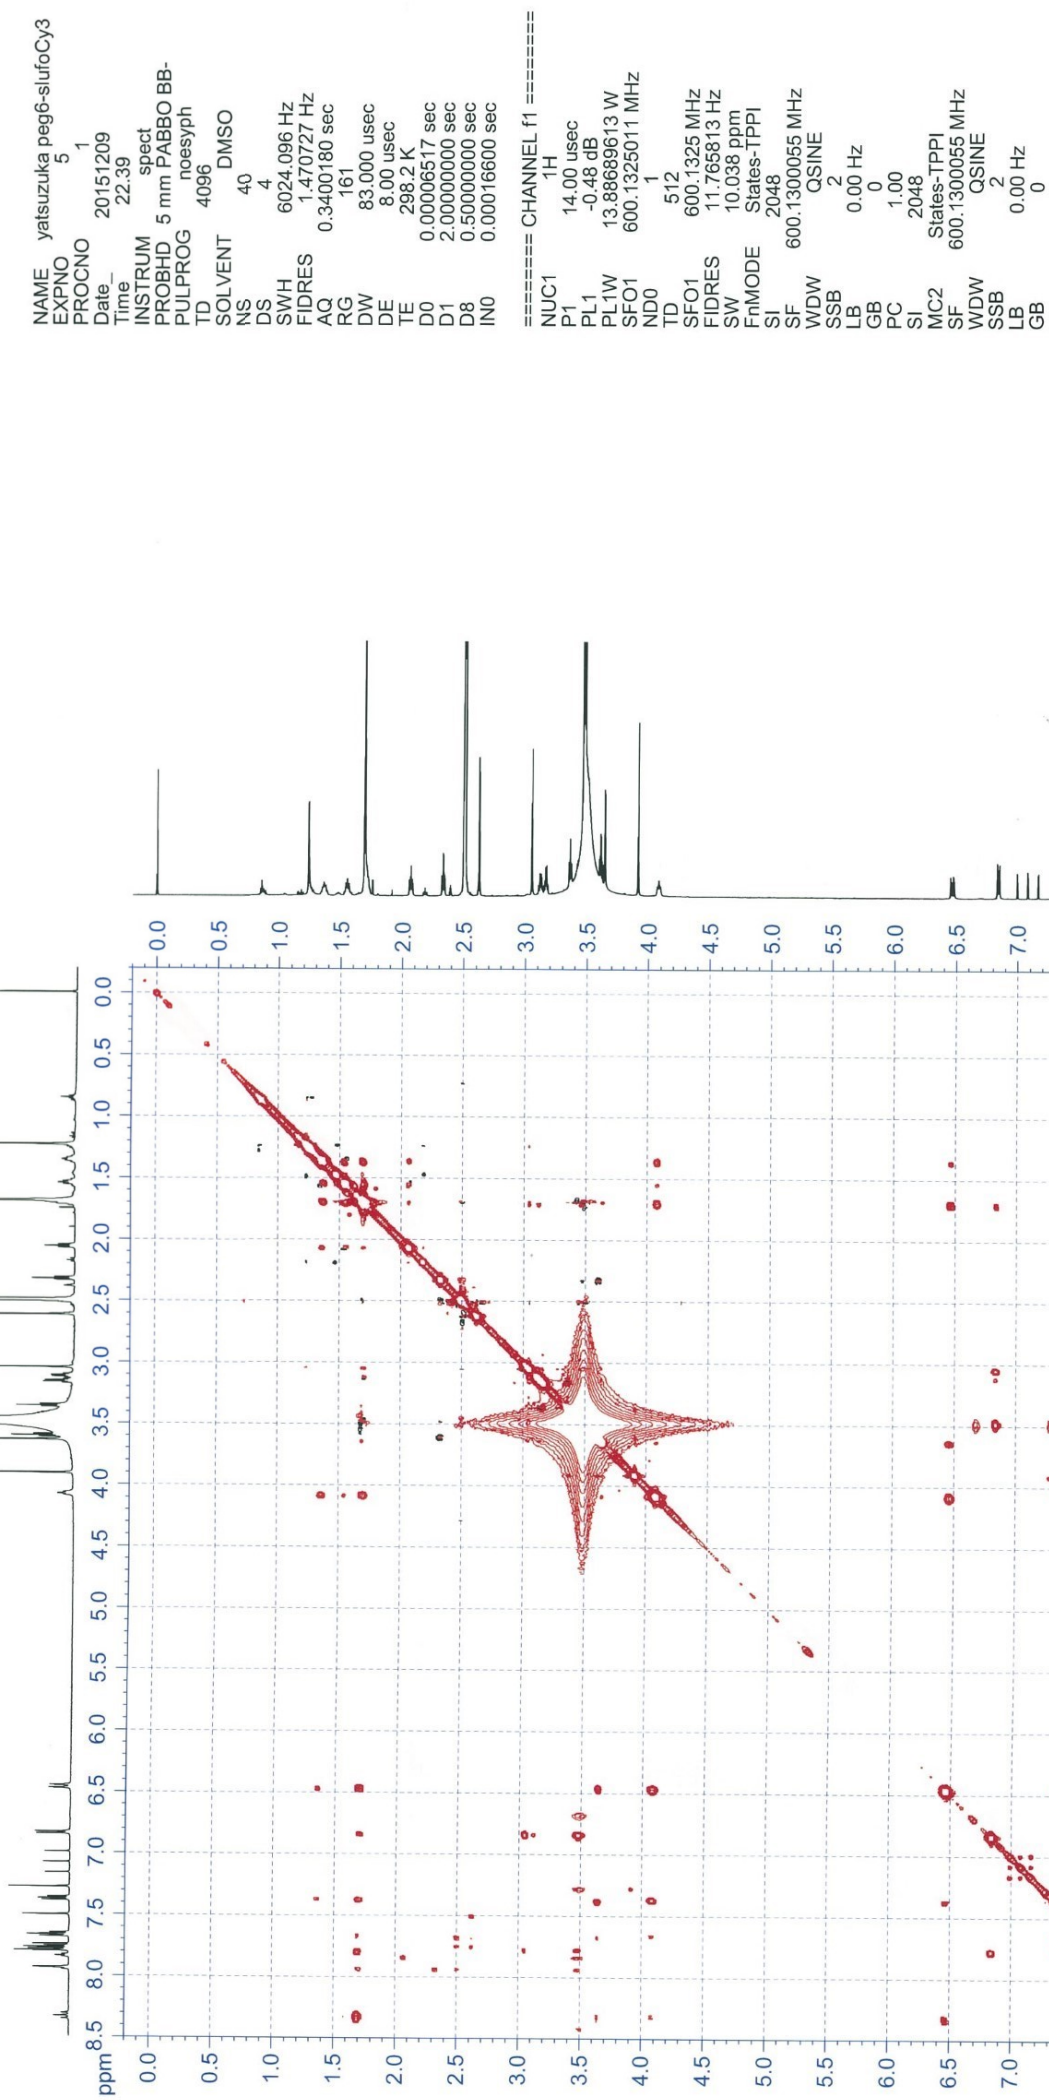

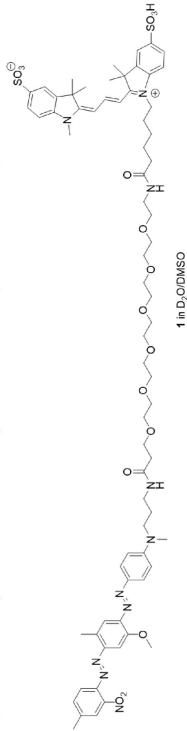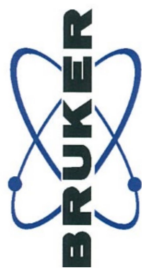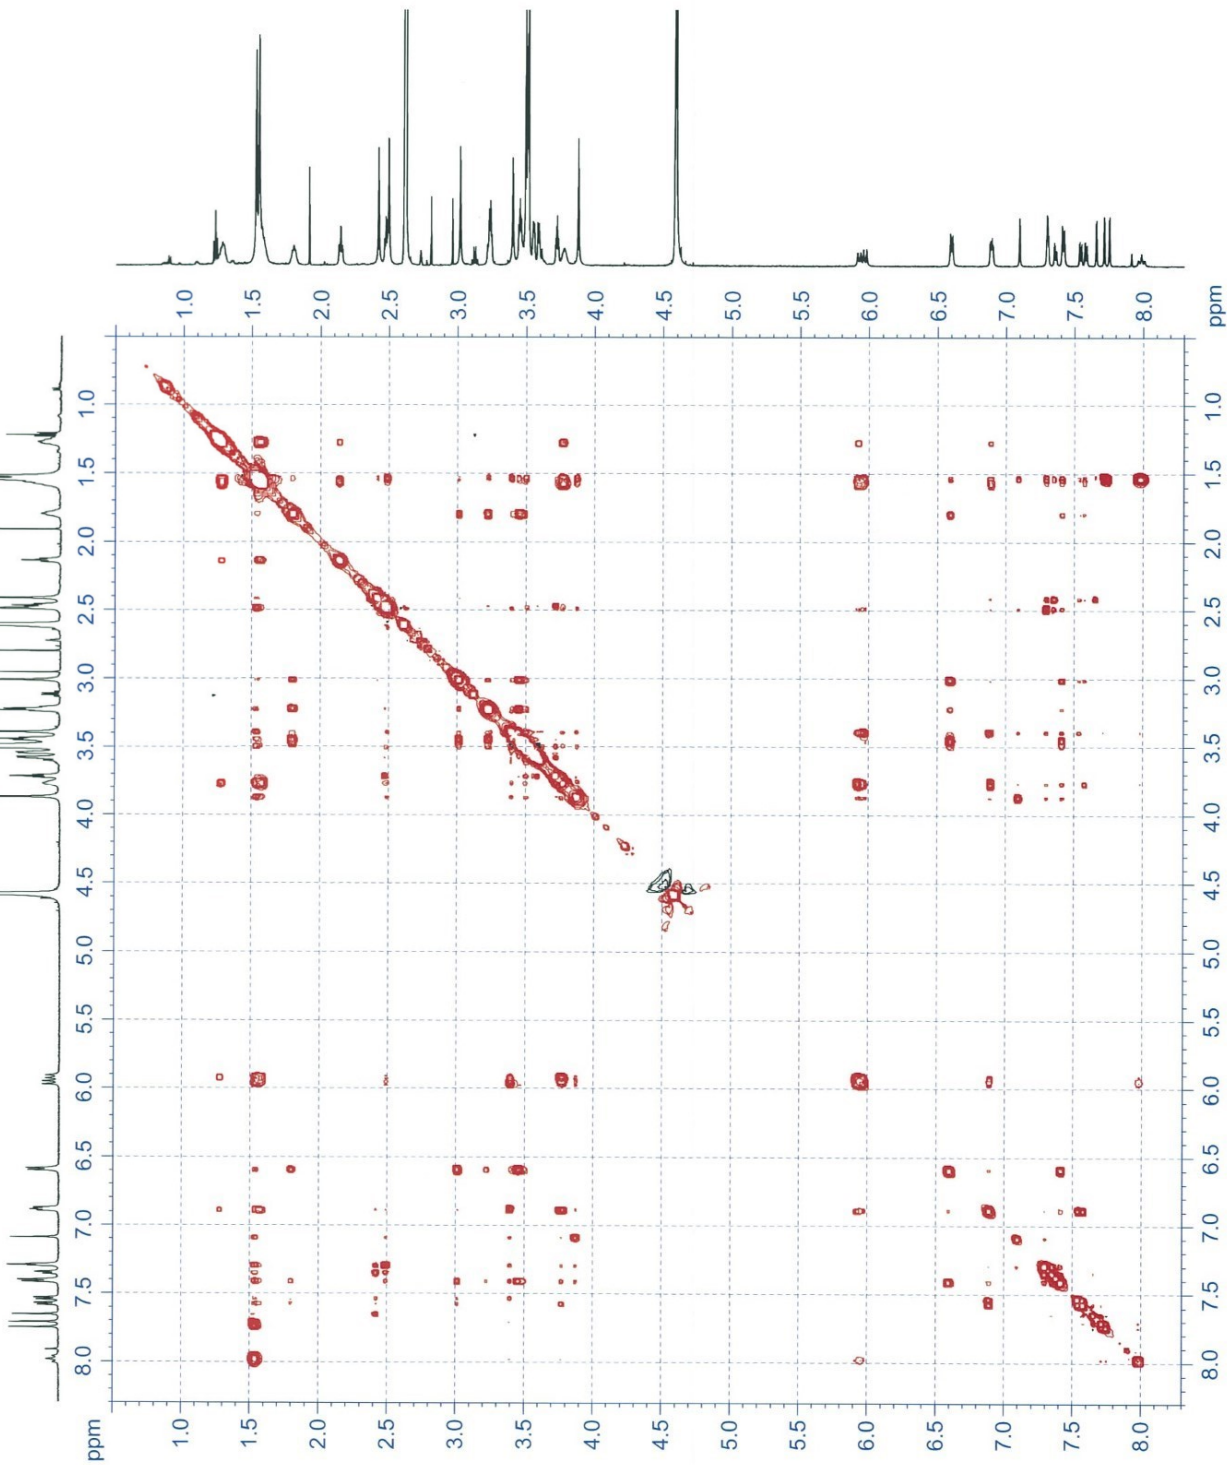

```

NAME ykzshuizhuo.B1011-pag6-sulfuCo3.5%DMSCo-H2O high
EXPNO 1
PROCNO 5
Date_ 20110311
Time 4:05
INSTRUM spect
PROBHD 5 mm PABBO BB-
PULPROG zgpg30
TD 2048
SOLVENT DMSO
DS 14
SS 14
SWH 5952.381 Hz
FIDRES 2.906439 Hz
AQ 0.1114263 sec
RG 144
DWTW 64.000 usec
DE 298.2 usec
D0 0.00006617 sec
D1 1.1 sec
D2 2.00000000 sec
D3 0.00000000 sec
D4 0.00000000 sec
IN0 0.00016800 sec
===== CHANNEL f1 =====
NUC1
P1 14.00 usec
PL1 0.00 dB
NUC2
P2 13.00 usec
PL2 0.00 dB
SFO1 60.1323098 MHz
N0 201
SFO1 600.1323 MHz
FIDRES 23.257488 Hz
AQ 0.1114263 sec
INSTRUM spect-PPH
PULPROG zgpg30
TD 1024
SI SF 600.1299407 MHz
SFO1 600.1323 MHz
SSB 2
WDW COSY
GB 0.00 Hz
PC 1.00
RG 1
SI 1024
SFO2 States-PPH
FIDRES 600.1323 MHz
AQ 0.1114263 sec
INSTRUM WDW
PULPROG GSSINE
SSB 2
WDW 0.00 Hz
GB 0

```



$$\begin{array}{l} H \\ H \\ H \end{array} \cos Y \quad \begin{array}{l} H \\ H \\ H \end{array} \cos C$$
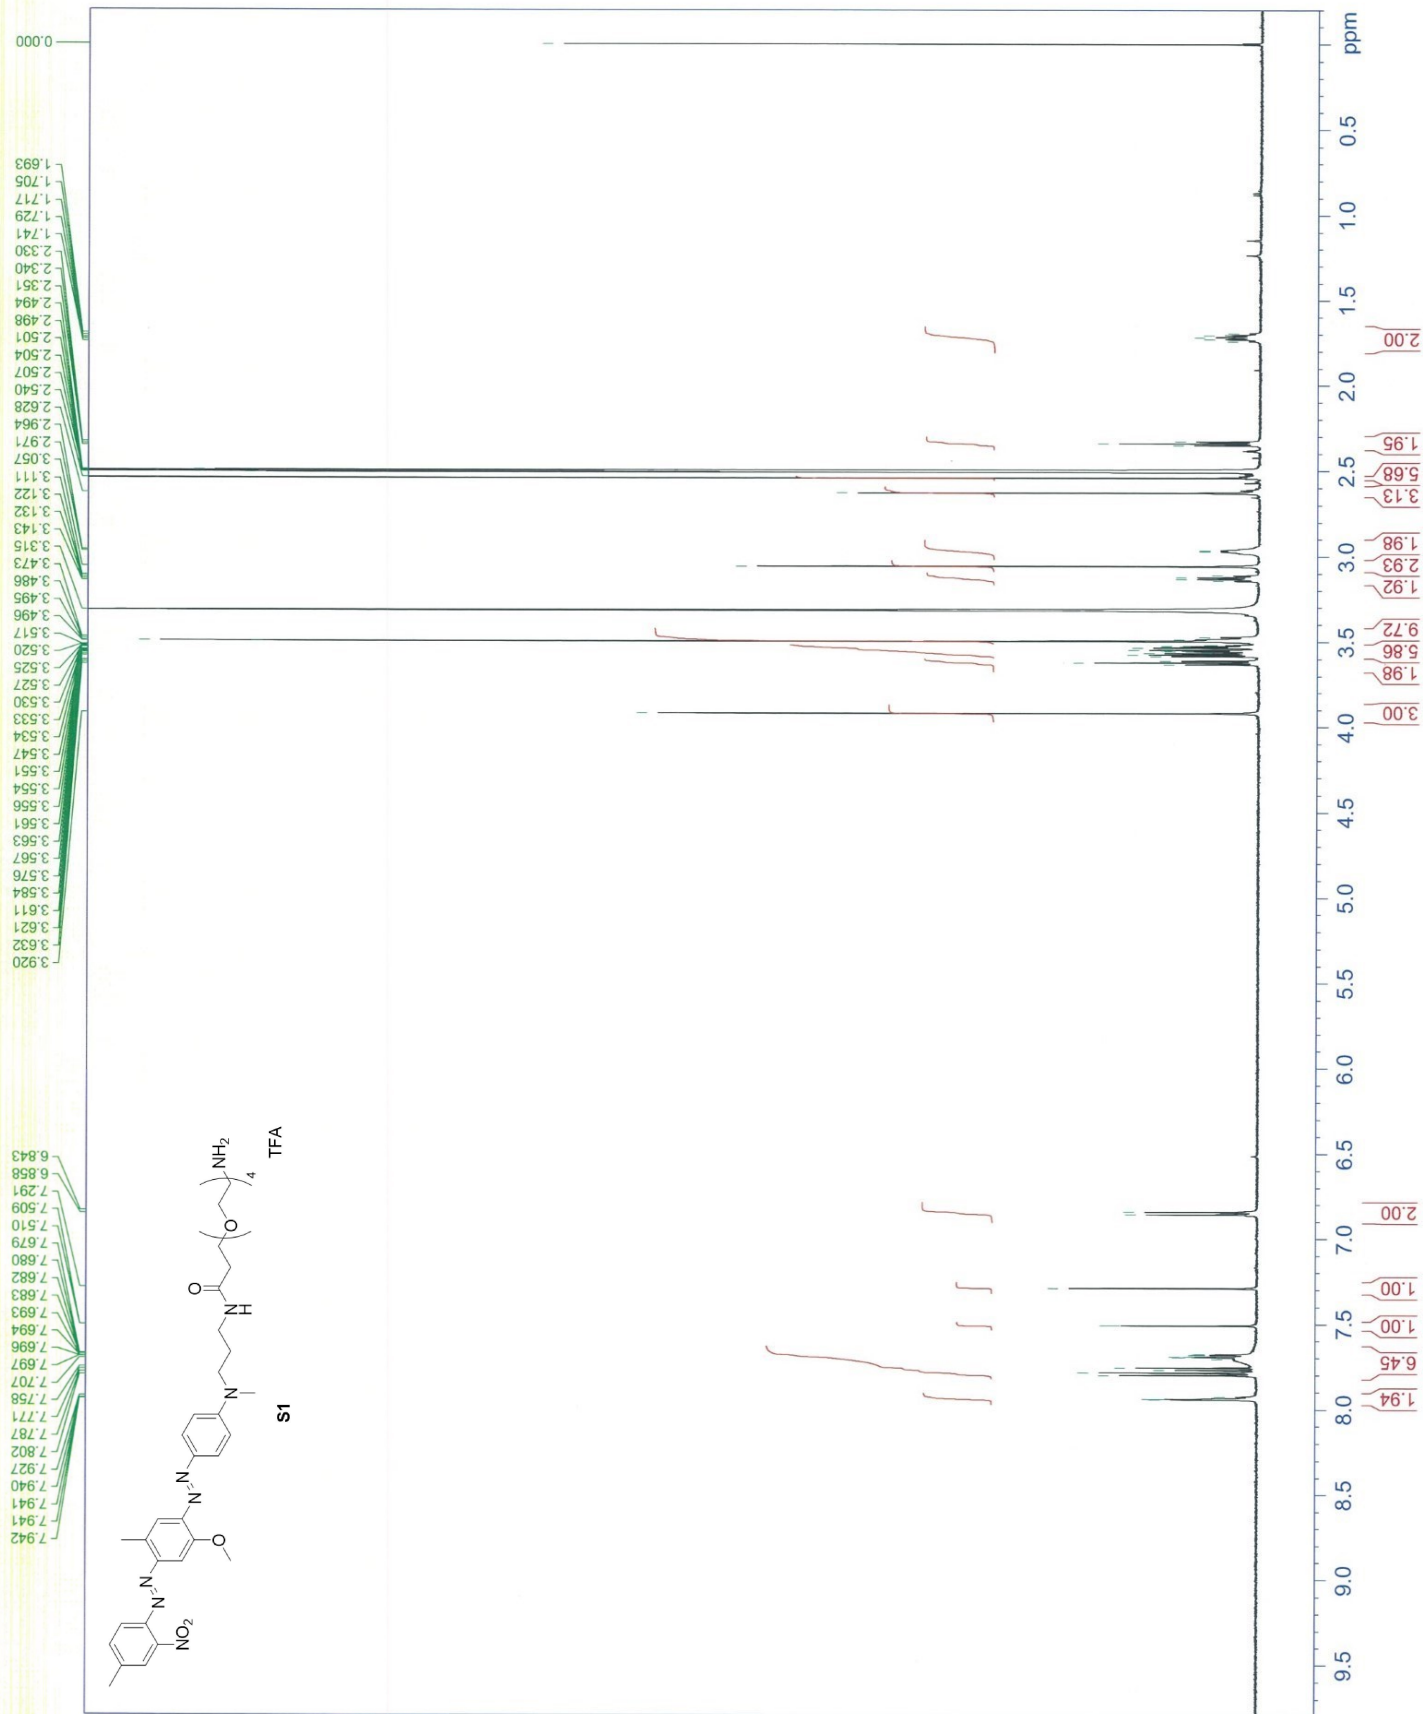

GB 0.9

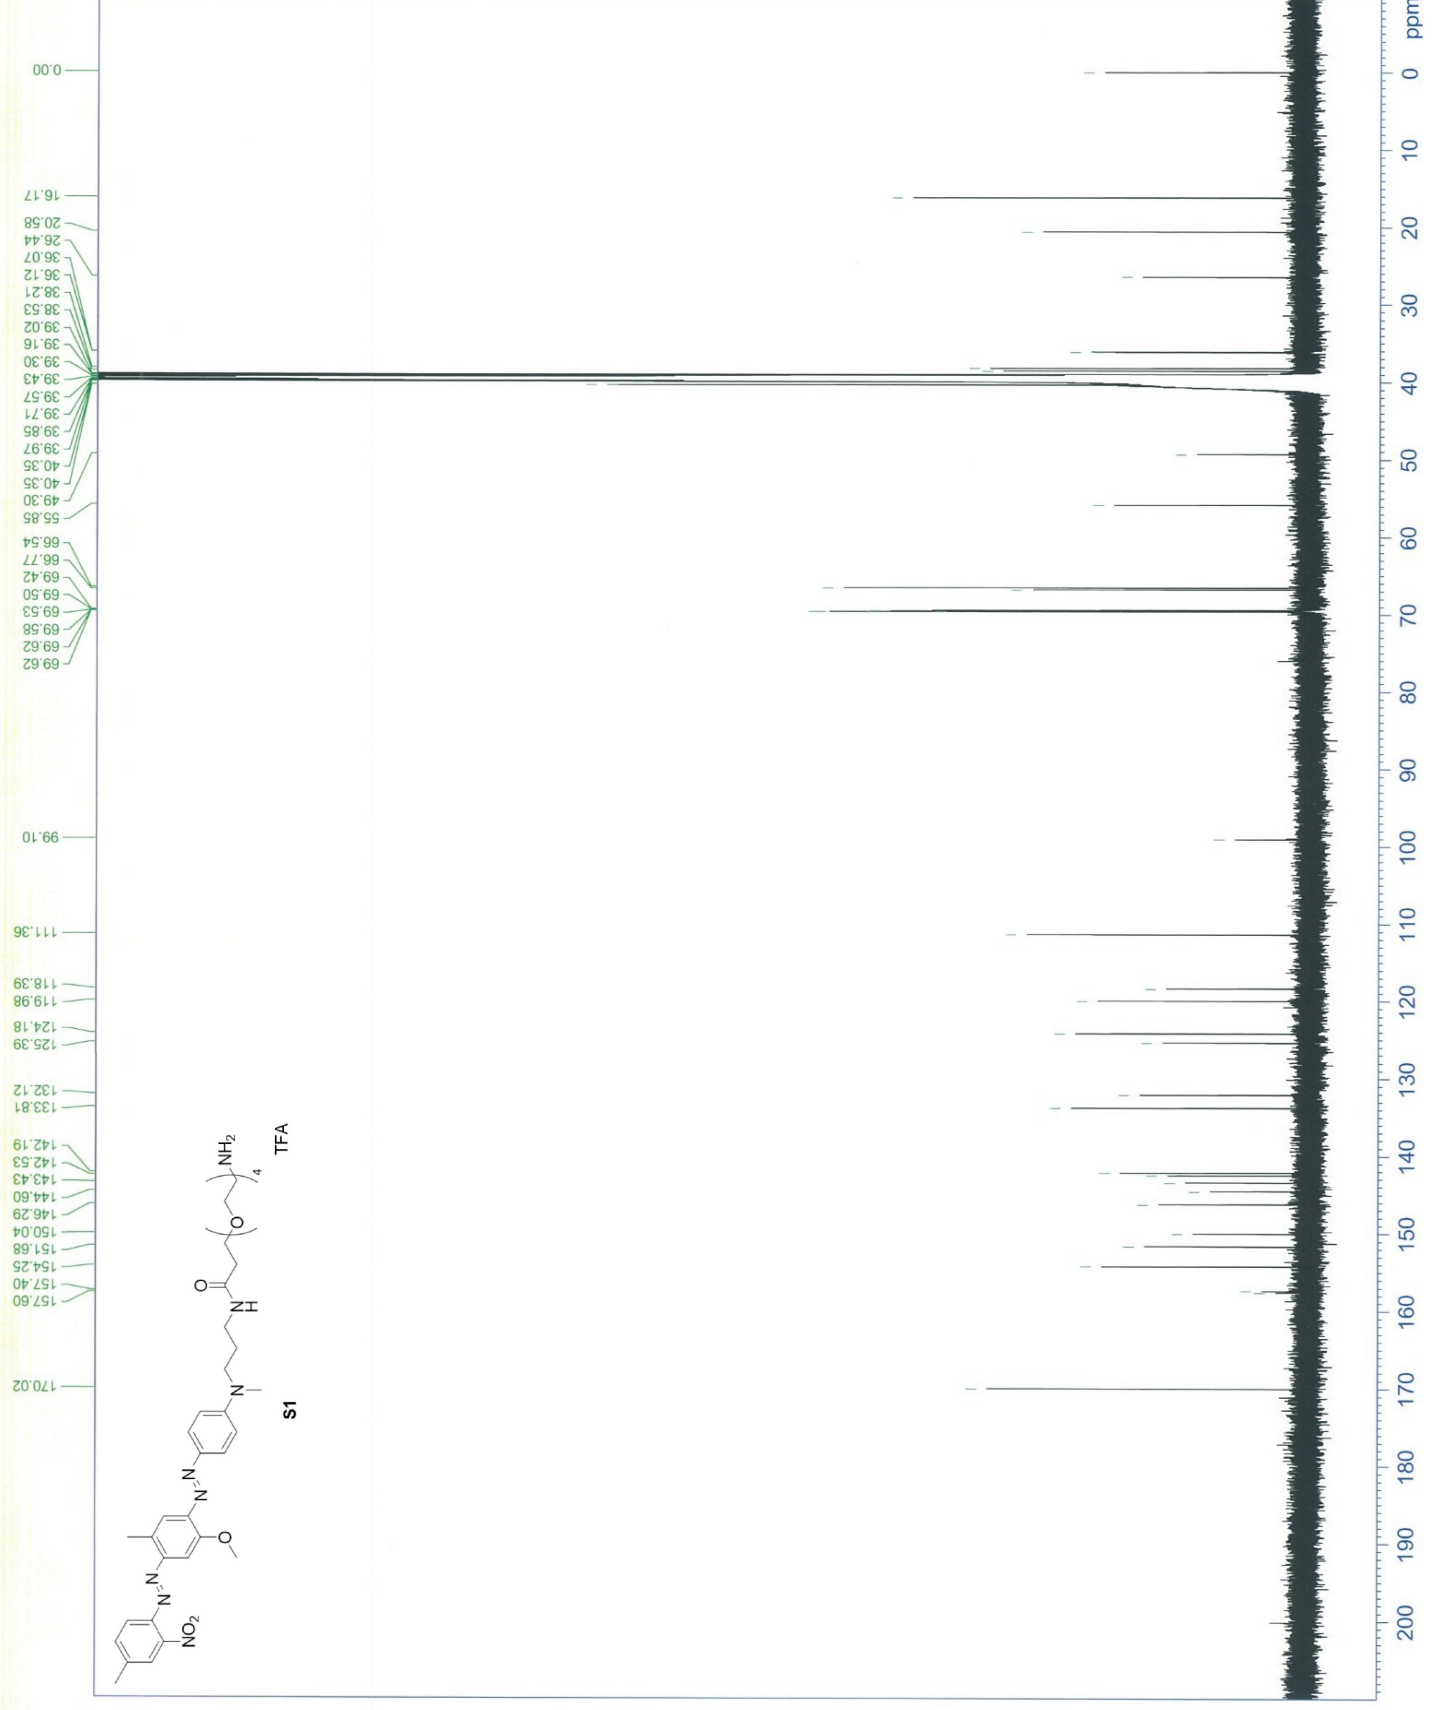

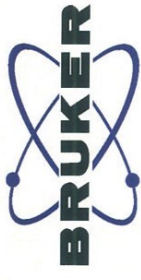

NAME yatsuzuka BHQ1-peg8  
EXPNO 1  
PROCNO 1  
Date\_ 20180206  
Time 14.30  
INSTRUM spect  
PROBHD 5 mm PABBO BB-  
PULPROG zg30  
TD 131072  
SOLVENT DMSO  
NS 128  
DS 0  
SWH 12335.526 Hz  
FIDRES 0.094113 Hz  
AQ 5.3128352 sec  
RG 203  
DW 40.533 usec  
DE 8.00 usec  
TE 298.2 K  
D1 5.00000000 sec  
TD0 1000

===== CHANNEL f1 =====  
NUC1 1H  
P1 14.00 usec  
PL1 -2.80 dB  
PL1W 23.69219017 W  
SFO1 600.1337060 MHz  
SI 65536  
SF 600.1300065 MHz  
WDW EM  
SSB 0  
LB 0.00 Hz  
GB 0  
PC 1.00

H  
13C  
DEPT135  
9 27

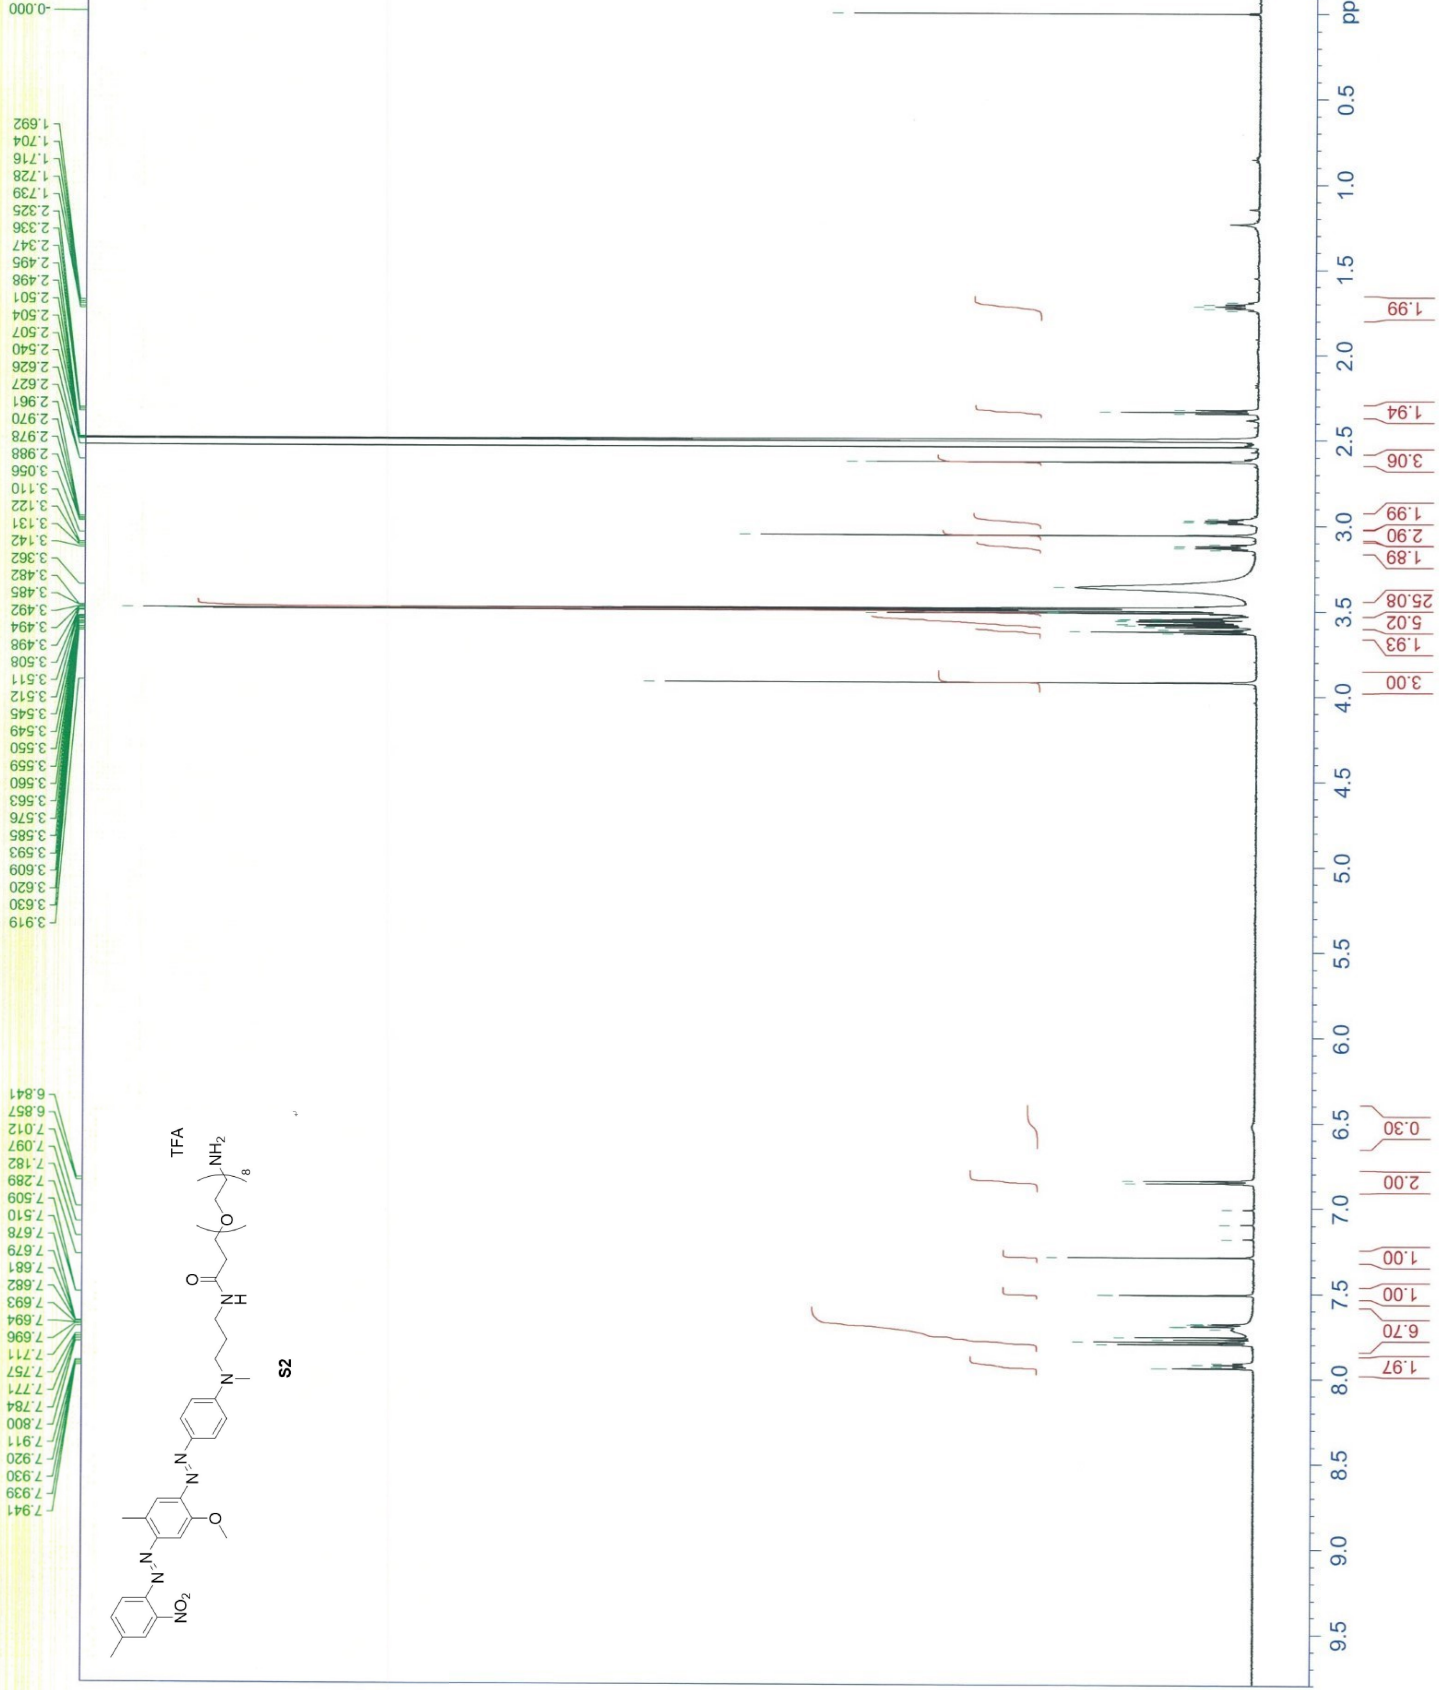



1.40 PC

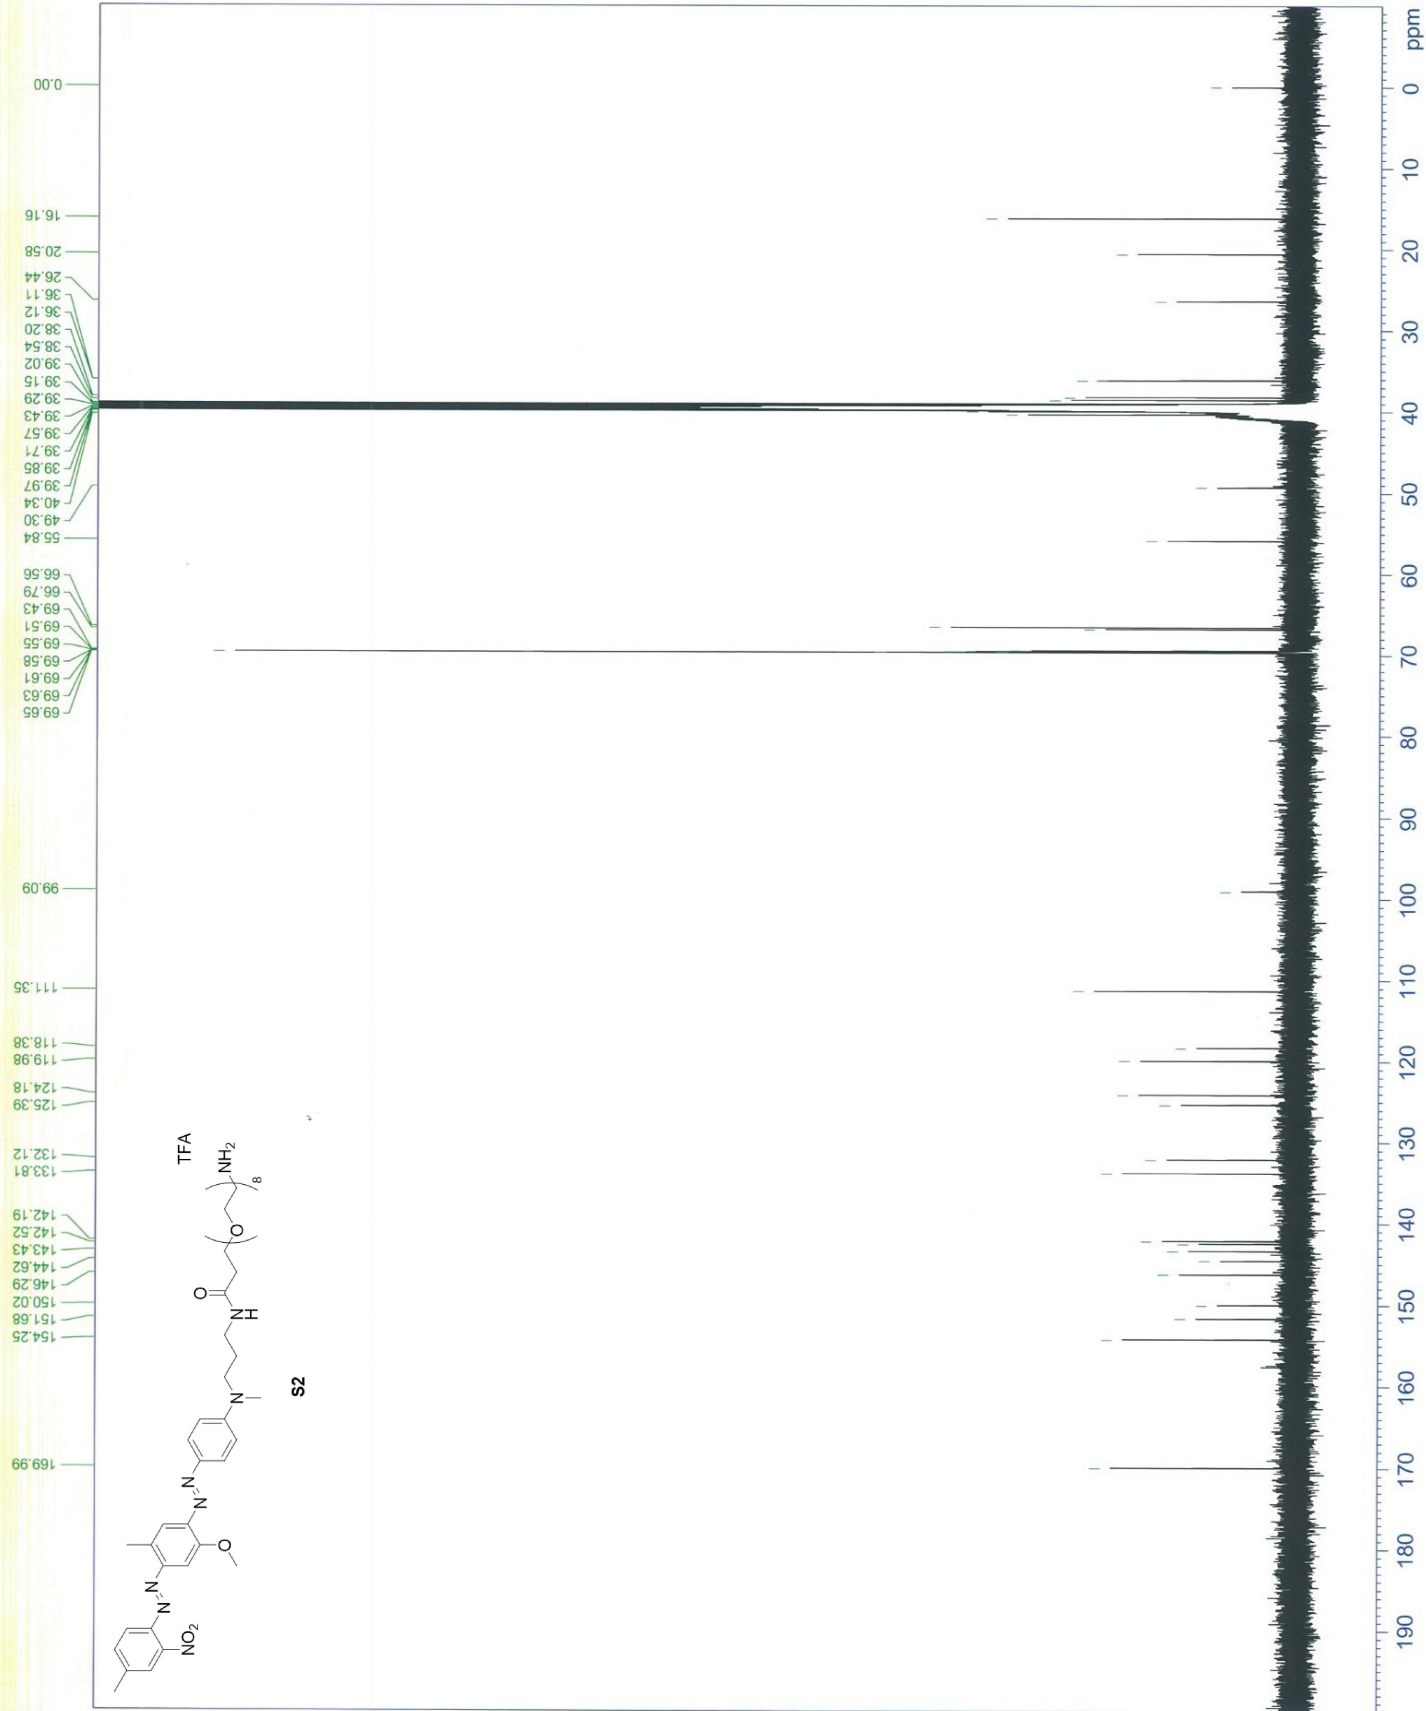



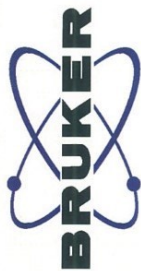

NAME yatsuzuka BHQ1-peg12

EXPNO 1

PROCNO 1

Date\_ 20180207

Time 14.05

INSTRUM spect

PROBHD 5 mm PABBO BB-

PULPROG zg30

TD 131072

SOLVENT DMSO

NS 112

DS 0

SWH 12335.526 Hz

FIDRES 0.094113 Hz

AQ 5.3128352 sec

RG 203

DW 40.533 usec

DE 8.00 usec

TE 298.2 K

D1 5.0000000 sec

TD0 1000

===== CHANNEL f1 =====

NUC1 1H

P1 14.00 usec

PL1 -2.80 dB

PL1W 23.69219017 W

SFO1 600.1337060 MHz

SI 65536

SF 600.1300061 MHz

WDW EM

SSB 0

LB 0.00 Hz

GB 0

PC 1.00

後で 13C  
DEPT135  
測定予定

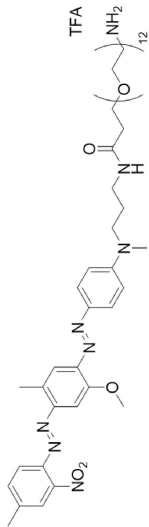

S3

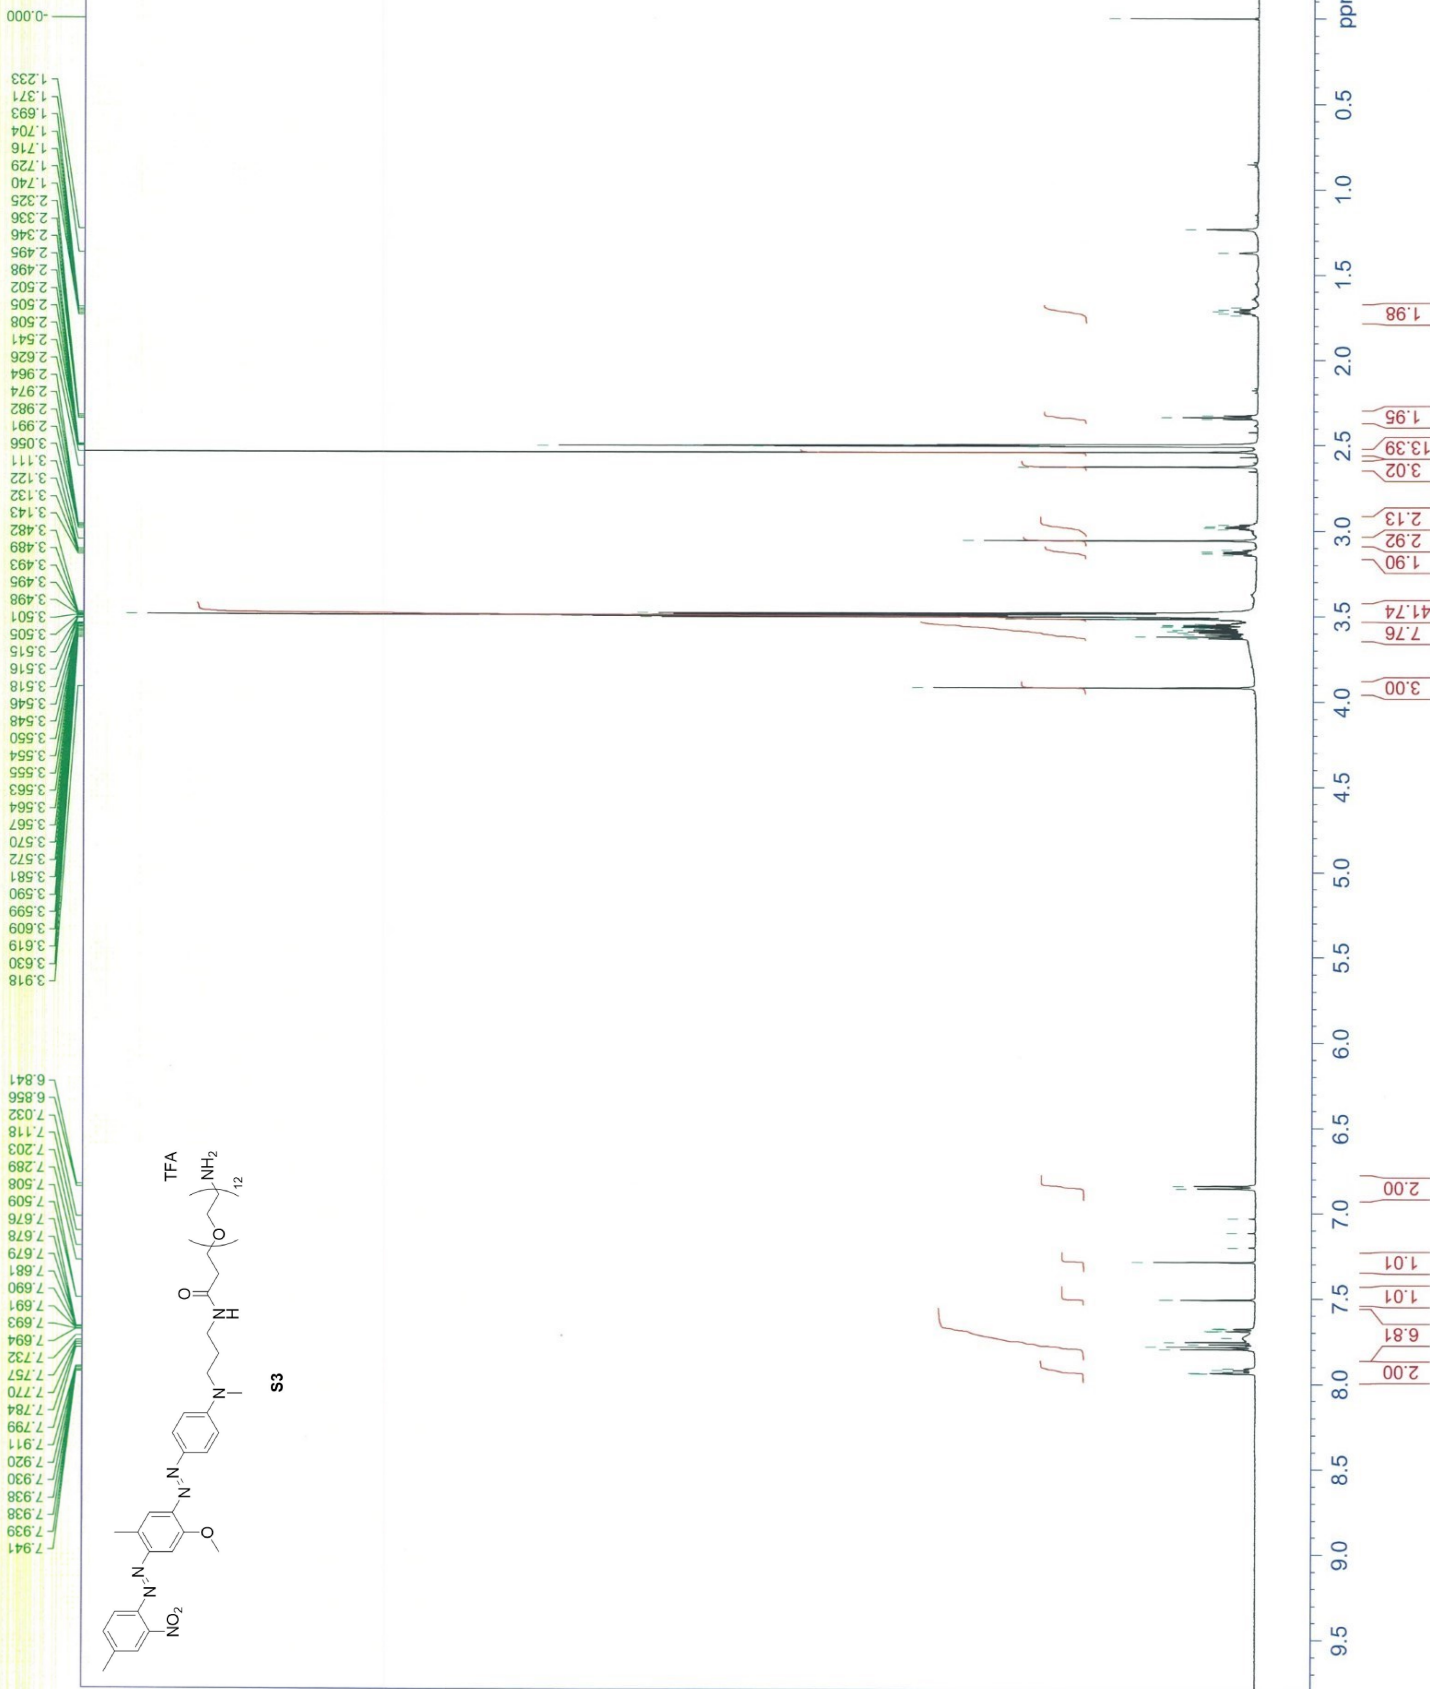

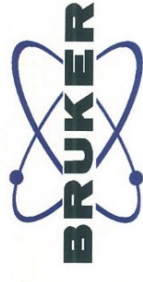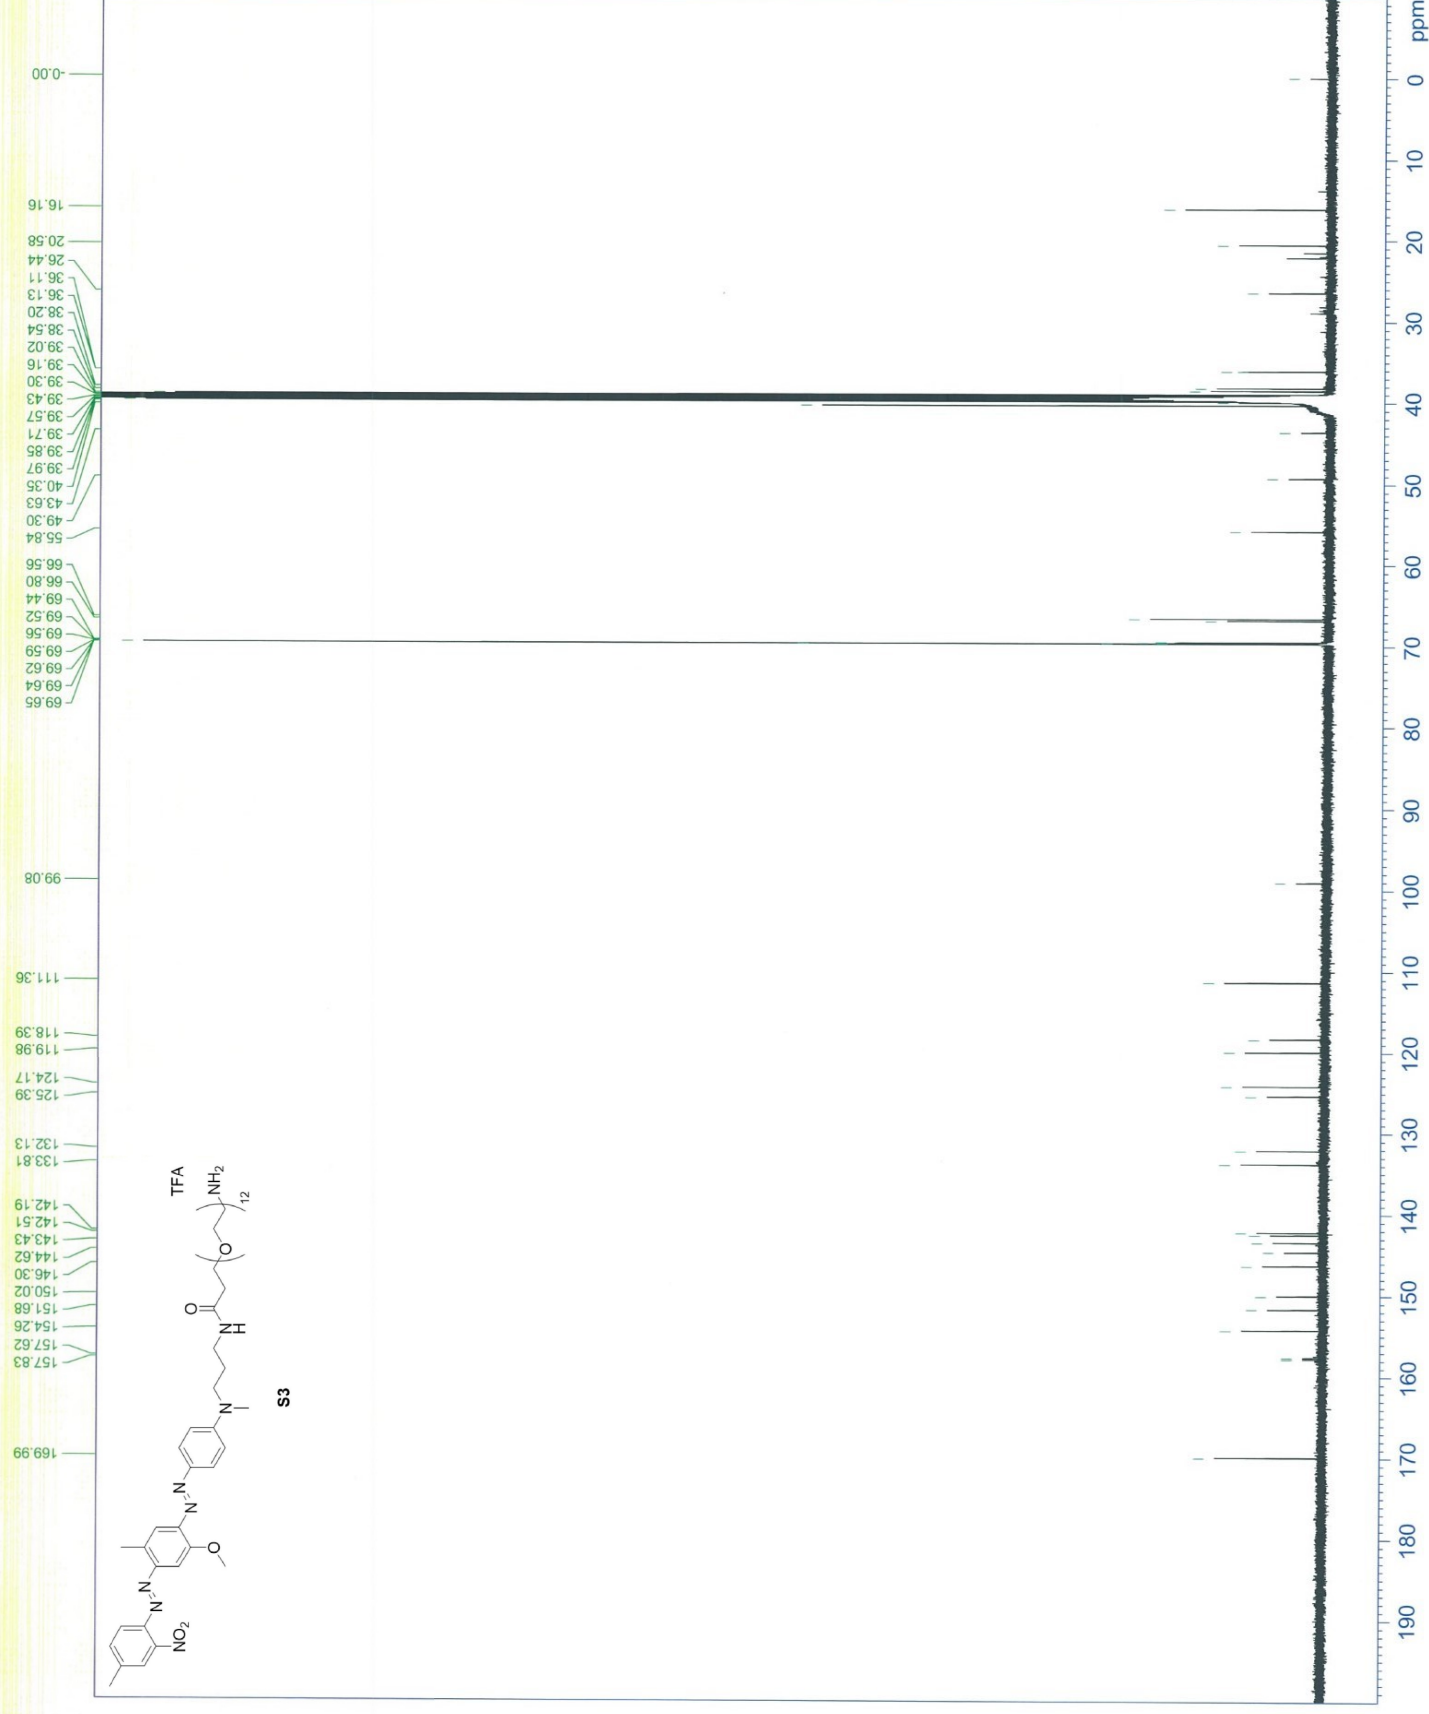

NAME yatsuzuka BHQ1-peg12

EXPNO 2

PROCNO 1

Date\_ 20180207

Time 18.23

INSTRUM spect

PROBHD 5 mm PABBO BB-

PULPROG zgpg45

TD 131072

SOLVENT DMSO

NS 16976

DS 4

SWH 48076.922 Hz

FIDRES 0.366798 Hz

AQ 1.3631988 sec

RG 203

DW 10.400 usec

DE 8.00 usec

TE 298.3 K

D1 2.00000000 sec

D11 0.03000000 sec

TD0 10000

===== CHANNEL f1 =====

NUC1 13C

P1 9.00 usec

PL1 0.17 dB

PL1W 84.78267670 W

SFO1 150.9178988 MHz

===== CHANNEL f2 =====

CPDPRG2 waltz16

NUC2 1H

PCPD2 70.00 usec

PL2 -2.80 dB

PL12 11.18 dB

PL13 13.00 dB

PL2W 23.69219017 W

PL12W 0.94755661 W

PL13W 0.62316805 W

SFO2 600.1324005 MHz

SI 131072

SF 150.9028963 MHz

WDW EM

SSB 0

LB 0.20 Hz

GB 0

PC 1.40

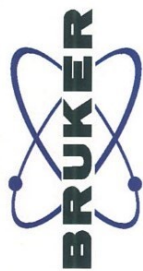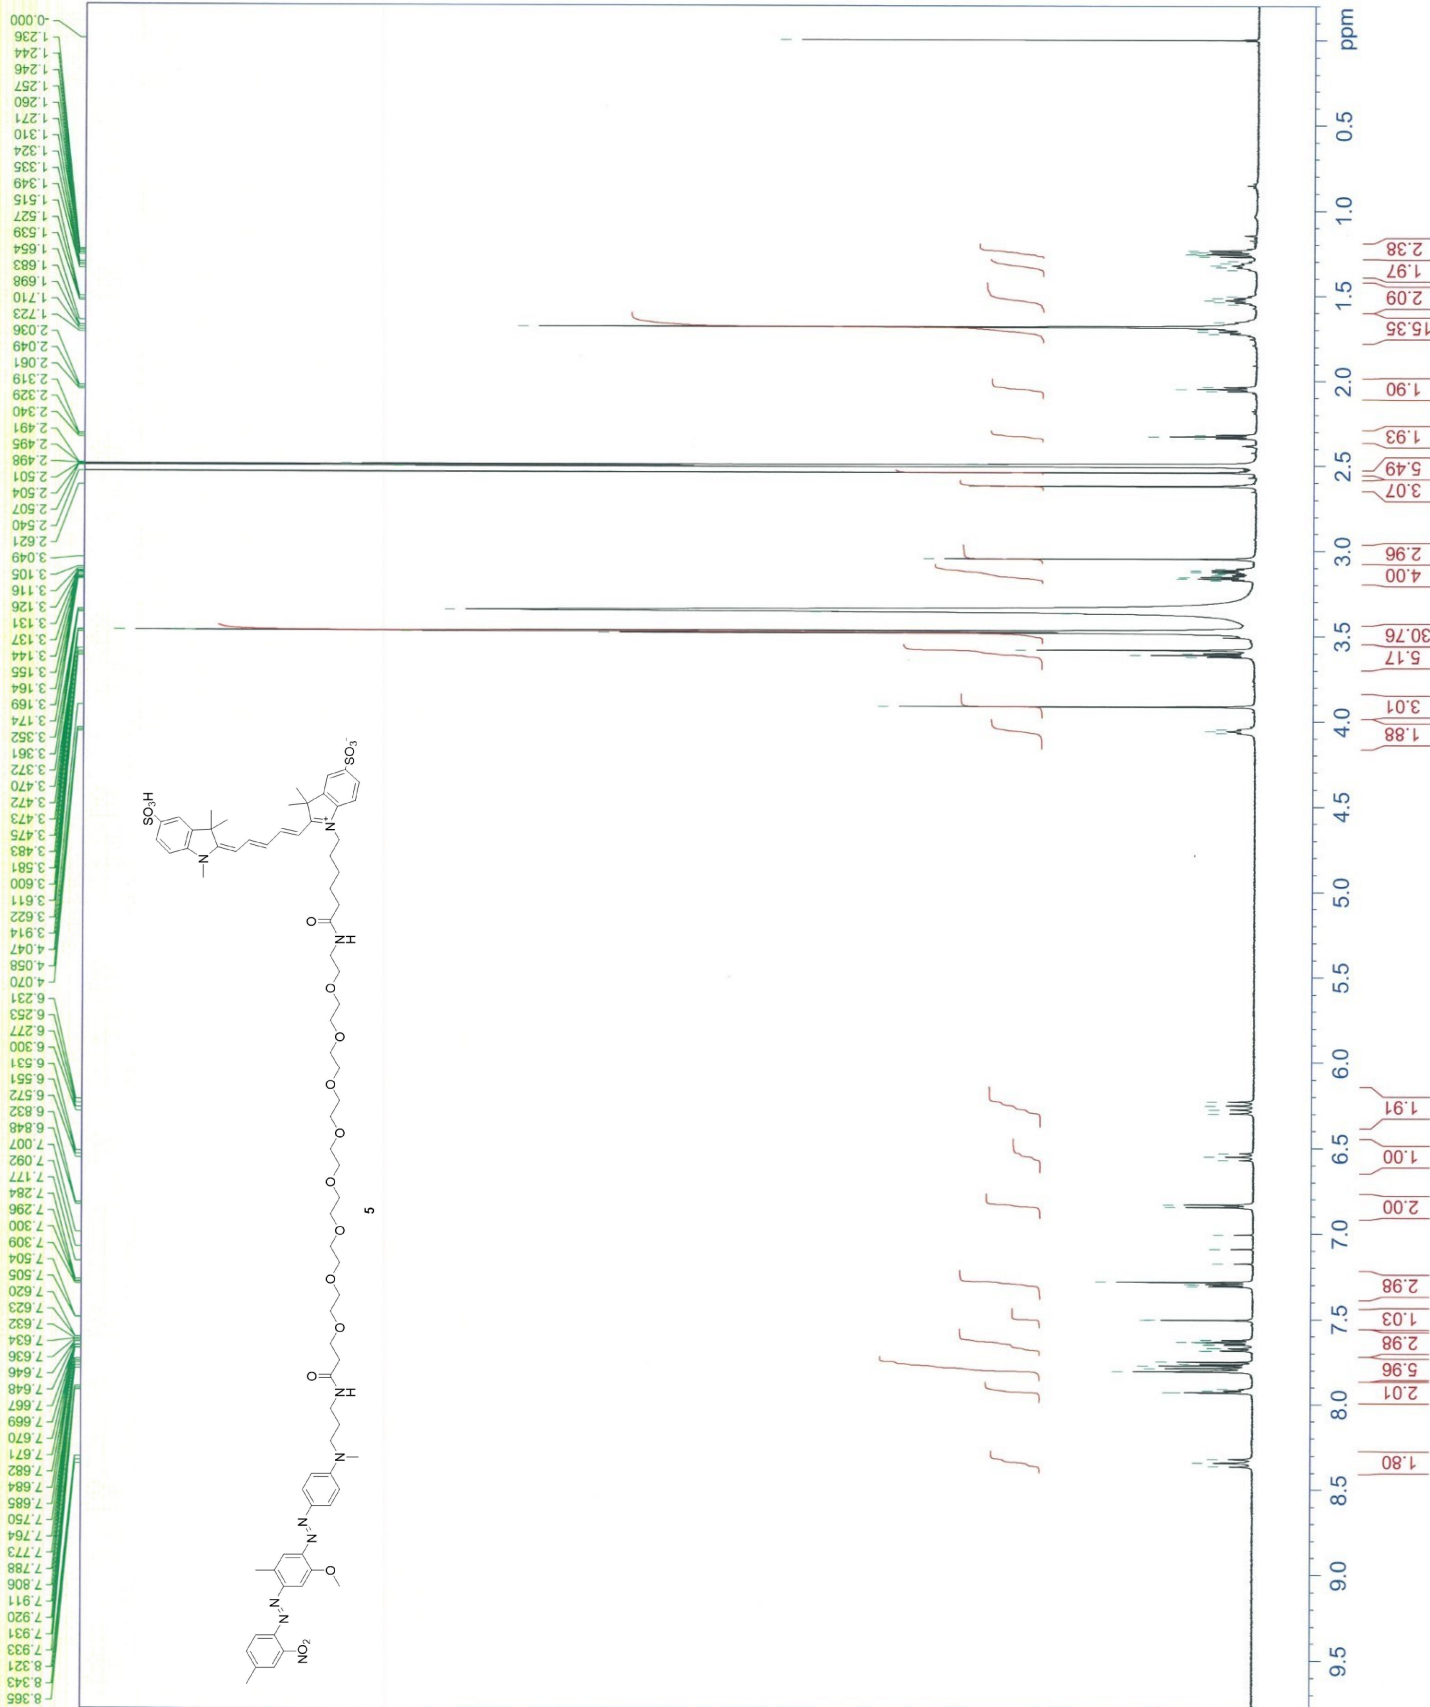

NAME yatsuzuka BHQ1-sulfoCy5

EXPNO 1

PROCNO 1

Date\_ 20180207

Time 10.50

INSTRUM spect

PROBHD 5 mm PABBO BB-

PULPROG zg30

TD 131072

SOLVENT DMSO

NS 208

DS 0

SWH 12335.526 Hz

FIDRES 0.094113 Hz

AQ 5.3128352 sec

RG 203

DW 40.533 usec

DE 8.00 usec

TE 298.2 K

D1 5.0000000 sec

TD0 1000

===== CHANNEL f1 =====

NUC1 1H

P1 14.00 usec

PL1 -2.80 dB

PL1W 23.69219017 W

SFO1 600.1337060 MHz

SI 65536

SF 600.1300063 MHz

WDW EM

SSB 0

LB 0.00 Hz

GB 0

PC 1.00

H (H COSY) 9 27



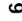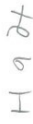

1

102

ON

DEC 2000

zg

MC

411

72

32

88

1

134

SN

90

2

M

47

NAME yatsuzuka DNB-peg7

EXPNO  
PROCNO

PROCNO 1

Date 20180202

Date\_ 20180202  
Time 16:12

Time 16.42

INSTRUM spect  
PROBHD 5 mm PABO BB-

PROBHD 5MM PABBS  
P11 PROC 7230

PULPROG zg30  
131073  
TD

TD 131072

| SOLVENT | DMSC |
|---------|------|
|---------|------|

128  
NS  
DIVERGENT  
DIVERGENT

071000

DS 0

SWH 12335.526 H

FIDRES 0.094113

AD 53128352

5.312835Z SE

RG 203

DW 40.533 use

DE 8.00  $\mu$ sec

DE  
TE

298.2 K

D1 5.00000000 se

TD0 1000

===== CHANNEL f1 =====

1H NMR

1400-1401

14.00 us

PL1 -2.80 dE

PL1W 23.692190

PLIW  
SEC01  
Z3.69Z190  
600 13370

SF-01 600.13370 05523

SI 65536

SF 600.130006

WDW  
EM

WLDW  
CCB

SSB 0

LB 0.00 Hz

GB 0

1886

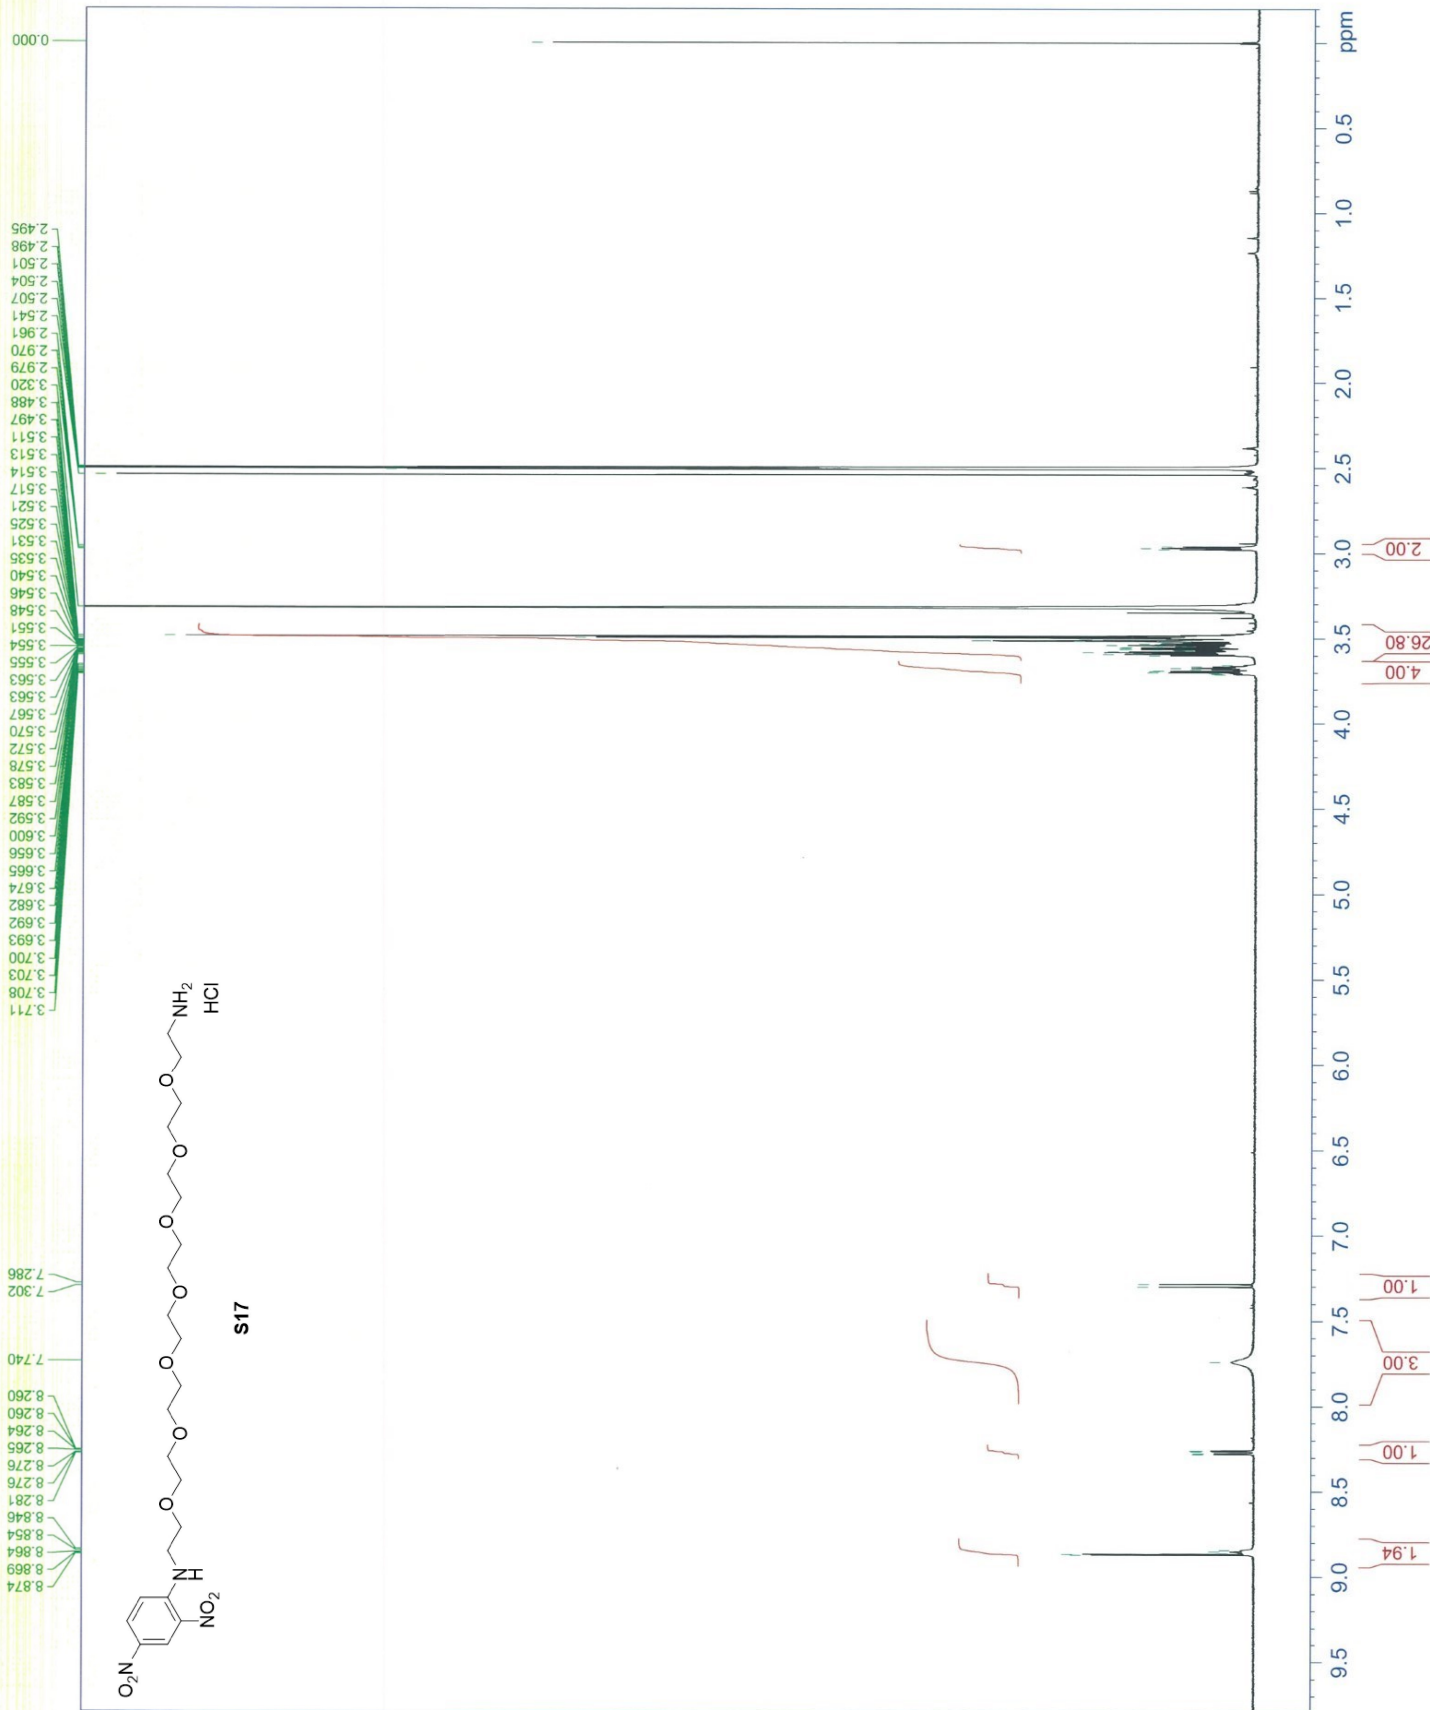

```
===== CHANNEL f1 =====
1H
P1      14.00 usec
PL1     -2.80 dB
PL1W    23.69219017 W
SFO1    600.1337060 MHz
SI      65536
SF      600.1300059 MHz
WDW     EM
SSB     0
LB      0.00 Hz
GB      0
PC      1.00
```

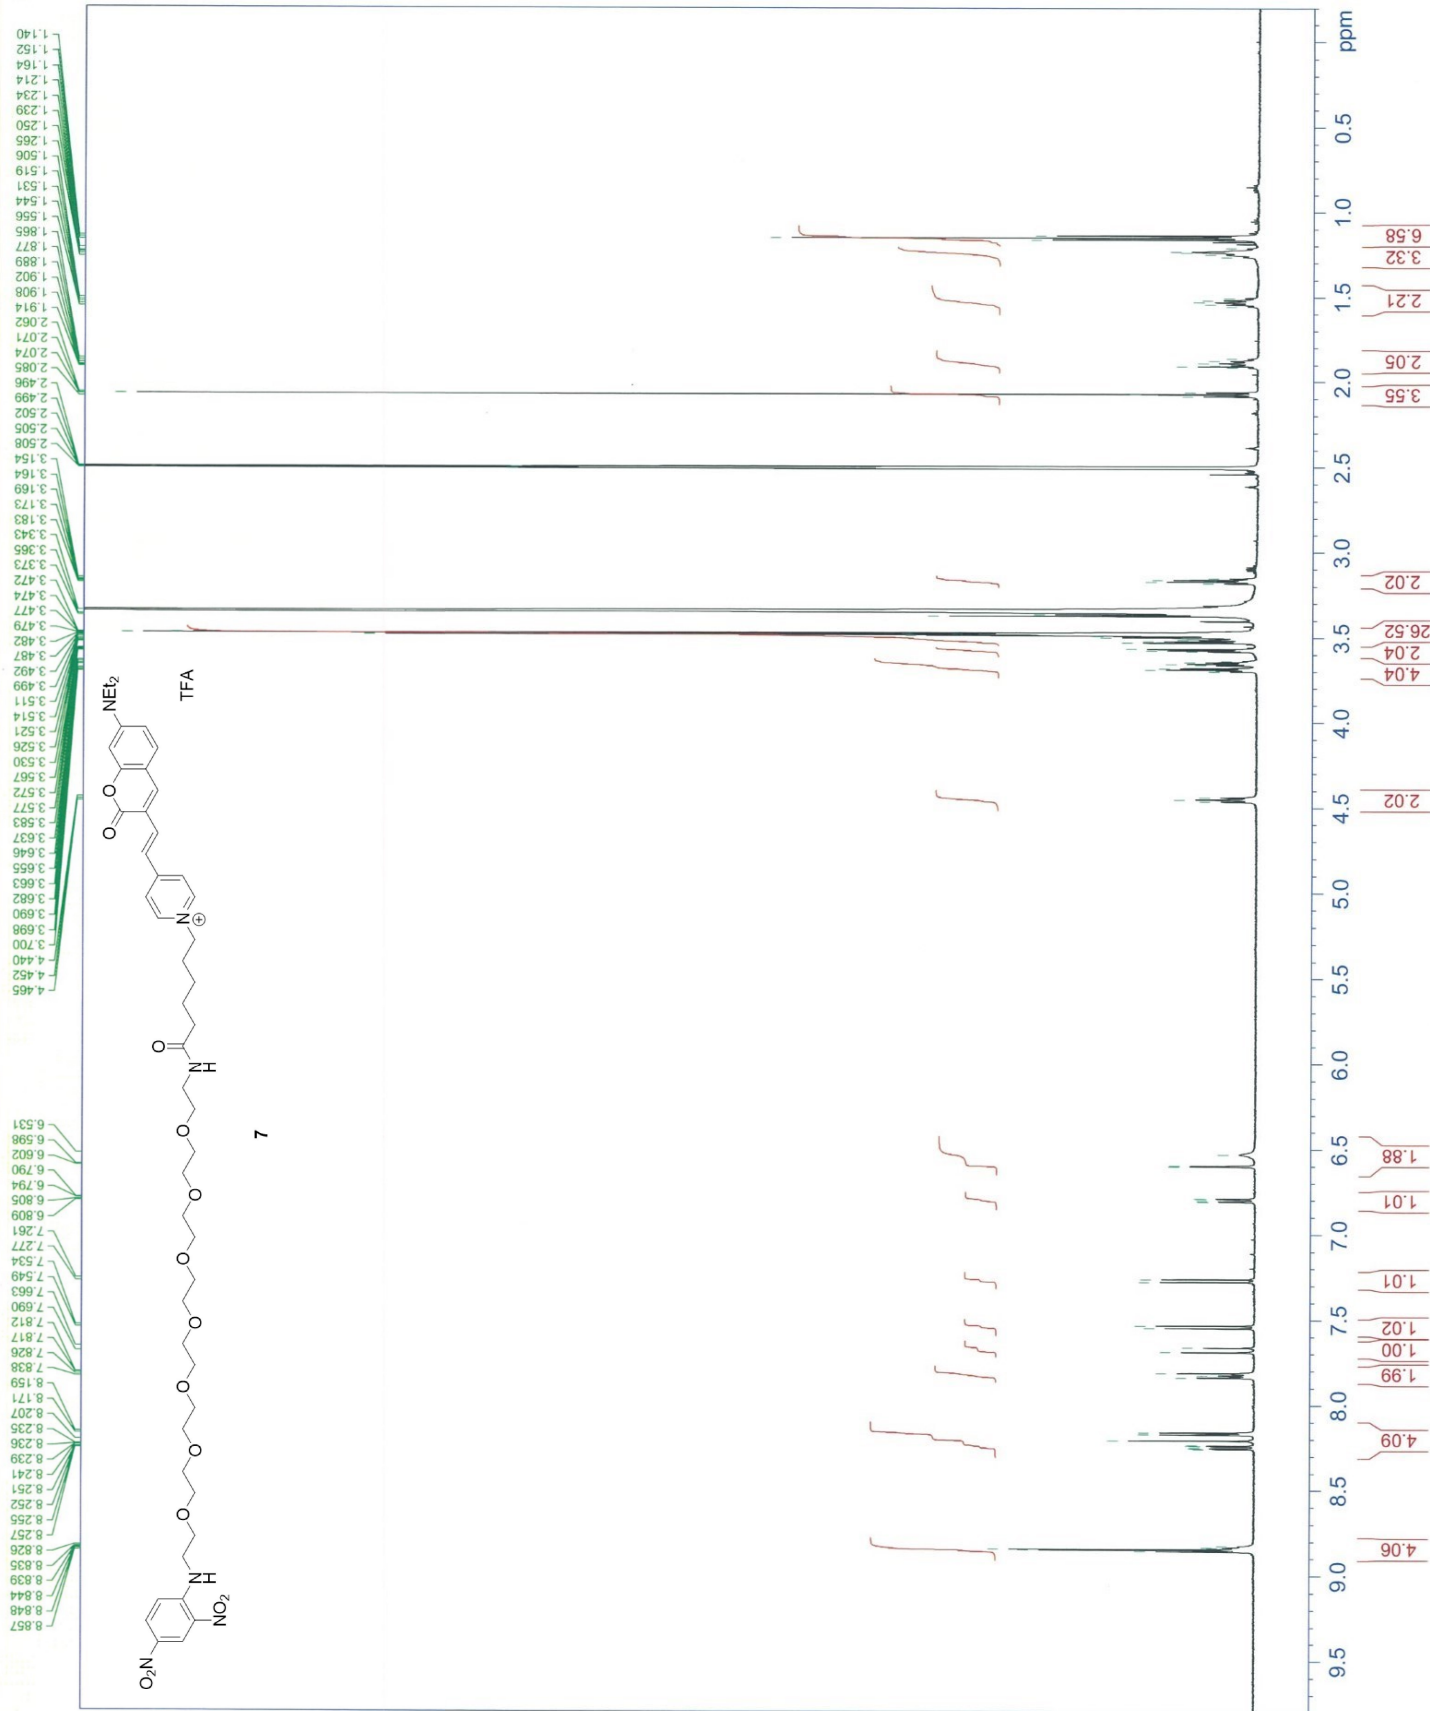



|         |                 |
|---------|-----------------|
| CPDPRG2 | waltz16         |
| NUC2    | 1H              |
| PCPD2   | 70.00 usec      |
| PL2     | -2.80 dB        |
| PL12    | 11.18 dB        |
| PL13    | 13.00 dB        |
| PL2W    | 23.69219017 W   |
| PL12W   | 0.94755661 W    |
| PL13W   | 0.62316805 W    |
| SFO2    | 600.1324005 MHz |
| SI      | 131072          |
| SF      | 150.9028976 MHz |
| WDW     | EM              |
| SSB     | 0               |
| LB      | 0.20 Hz         |
| GB      | 0               |
| PC      | 1.40            |

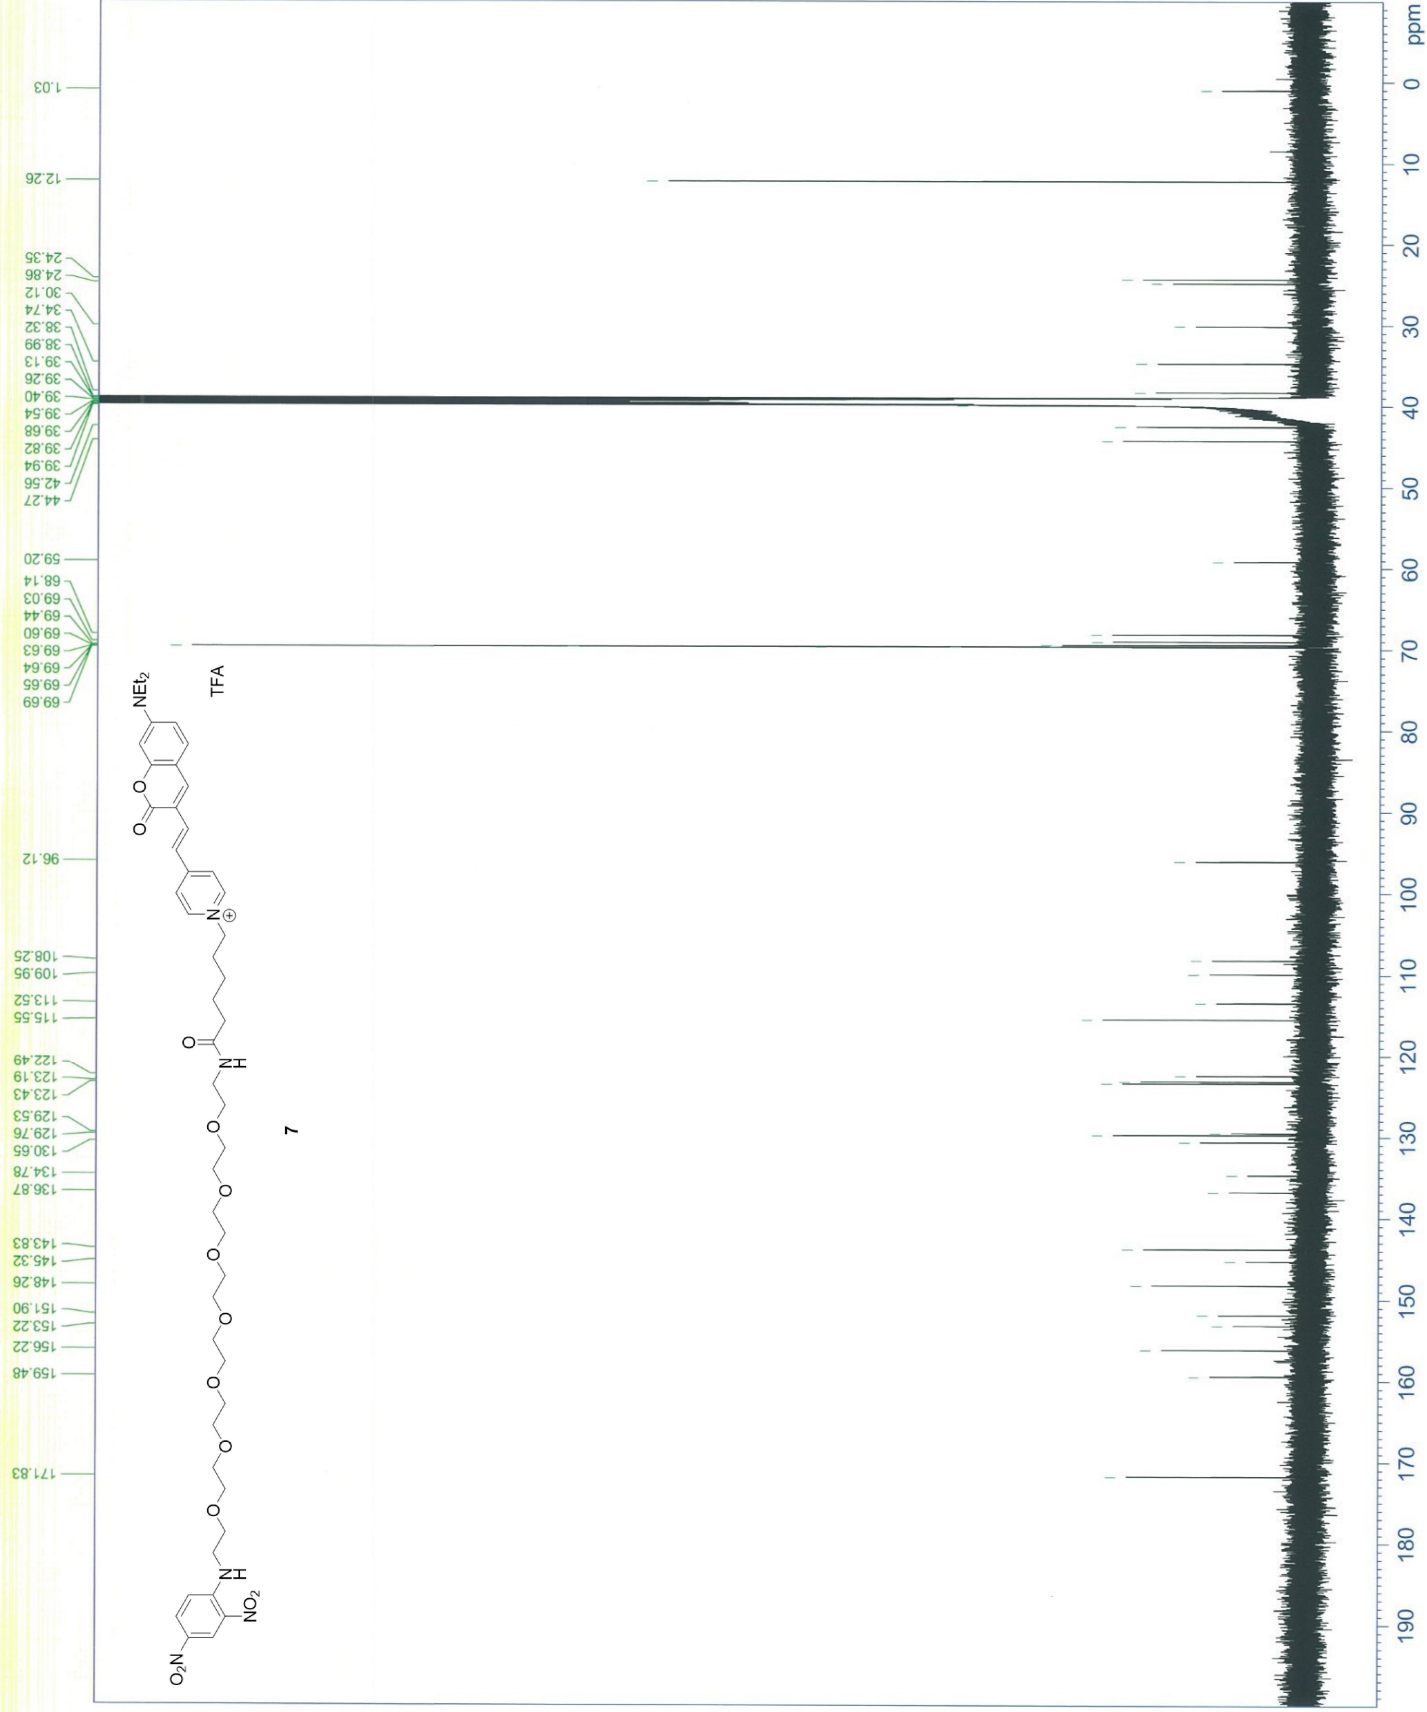

DFILE COMNT  
DATIM OBNUG  
EXMOD OBFRQ  
OBSET OBFIN  
POINT  
FREQU  
SCANS  
ACQTM  
PD  
PW1  
IRNUG  
CTEMP  
SLVNT  
EXREF  
BF  
RGAIN

EXMOD  
OBFRQ  
OBSET  
OBFIN  
POINT  
FREQU  
SCANS  
ACQTM  
PD  
PW1  
IRNUC  
CTEMP  
SLVNT  
EXREF  
BF  
RGAIN

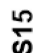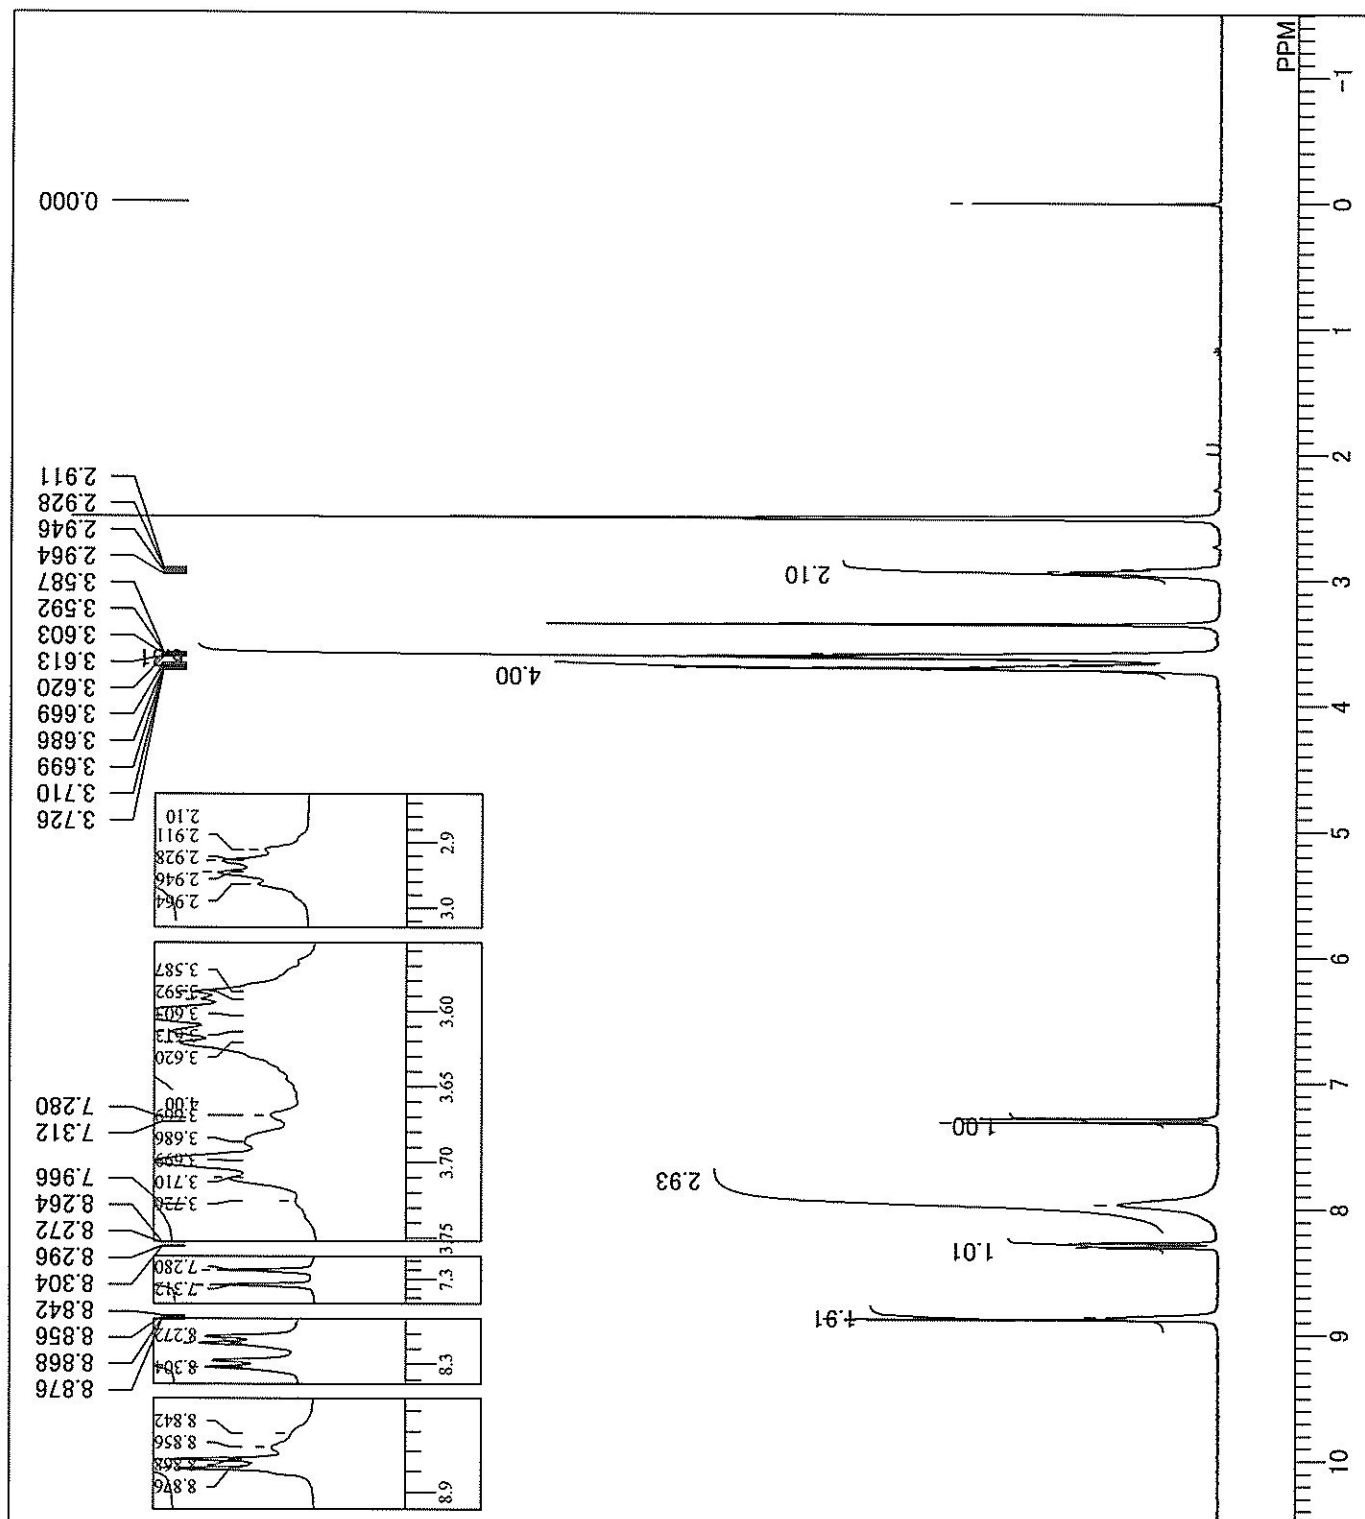

Supplement: c8cc03805h1.pdf [file c8cc03805h1.pdf]
